# Supplementary material for: Socio-economic determinants of maternal health care utilization in Kailahun District, Sierra Leone, 2020
Source: BMC Pregnancy Childbirth. 2022 Apr 1;22:276. doi: 10.1186/s12884-022-04597-z (PMC8976326; doi:10.1186/s12884-022-04597-z)
Supplement: Supplementary file 1 — Additional file 1. [file 12884_2022_4597_MOESM1_ESM.xlsx]

## Sheet: Sheet1
No	Locality Name	EA Code	Sections	Chiefdom	Period of stay at address	Age	Age last birth	Schooling	Educational Level	Religion	Ethnicity	Number of children	Parity	Number of births in past 5yrs	Marital Status	Occupation	Distance to Health facility(Mins)	Husband's Education	Husband's Occupation	Residence	Type of floor	Type of toilet	ANC	ANC provider	place of ANC	ANC from Skilled provider	Months of First ANC	Number of ANC	BP	Urine Sample	Body weight	Blood sample	TT	Fansidar/Antimalaria	SBA	Delivery assistant	Place of Delivery	Duration of stay after delivery(days)	delivery outcome	Mode of delivery	Postnatal care	First postnatal check( Hours)	Postnatal care provider	Follow-up after dicharged	Follow up time(days)	Follow-up provider	Place of follow-up
1	Foidu	1	Kama Dakaleley	Kissi Kama	4	40	39	No	None	Christian	Kissi	5	6	2	Married	Farmer	<30	Primary	Carpenter	Rural	Natural	Pit/others	Yes	Nurse	CHP	Yes	2	8	Yes	Yes	Yes	No	2	Yes	No	Nurse	CHP	3	Born alive	Normal	Yes	6hrs	Nurse	Yes	2	TBA	Patient Home
2	Ngoo	14	Upper Kuiva	Mandu	Always	28	28	Yes	Primary	Christian	Mende	2	4	1	married	Farmer	>60	None	Farmer	Rural	Modern	Pit/others	Yes	MCHAide	CHC	Yes	5	4	Yes	Yes	Yes	Yes	1	Yes	No	MCHAide	CHC	2	Born alive	Normal	Yes	1hrs	MCHAide	Yes	2	TBA	Patient Home
3	Ngoo	14	upper Kuiva	Mandu	Always	16	16	Yes	Junior Secondary	christian	Mende	2	2	2	married	Trader	>60	None	Trader	Rural	Modern	Pit/others	Yes	MCHAide	CHC	Yes	4	6	Yes	No	Yes	Yes	2	Yes	No	MCHAide	CHC	4hrs	Born alive	Normal	Yes	1hrs	MCHAide	Yes	3	CHW	Patient Home
4	Ngoo	14	Upper Kuiva	Mandu	Always	25	25	Yes	Junior Secondary	Islam	Mende	4	5	3	Married	Farmer	>60	Senior Secondary	Farmer	Rural	Modern	Pit/others	Yes	MCHAide	CHC	Yes	4	5	Yes	No	Yes	Yes	1	Yes	No	MCHAide	CHC	2hrs	Born alive	Normal	Yes	1hrs	MCHAide	Yes	2	TBA	Patient Home
5	Ngoo	14	Upper Kuiva	Mandu	Always	33	33	No	None	Islam	Mende	5	7	2	Married	farmer	30-60	None	Farmer	Rural	Natural	Pit/others	Yes	MCHAide	CHC	Yes	4	5	Yes	No	Yes	Yes	2	Yes	No	MCHAide	CHC	1	Born alive	Normal	Yes	1hrs	MCHAide	Yes	2	TBA	Patient Home
6	Ngoo	14	Upper Kuiva	Mandu	Always	19	18	Yes	Primary	Islam	Mende	1	1	1	Married	Farmer	30-60	Primary	Farmer	Rural	Modern	Pit/others	Yes	MCHAide	CHC	Yes	5	8	Yes	Yes	Yes	Yes	2	Yes	No	MCHAide	CHC	1	Born alive	Normal	Yes	2hrs	MCHAide	Yes	3	CHW	Patient Home
7	Ngoo	14	upper Kuiva	Mandu	3	28	28	Yes	Senior Secondary	Islam	Mende	1	1	1	Married	Student	>60	Senior Secondary	Student	Rural	Modern	Pit/others	Yes	Midwife	CHC	Yes	5	5	Yes	Yes	Yes	Yes	3	Yes	Yes	Midwife	CHC	3	Born alive	Normal	Yes	2hrs	MCHAide	Yes	7	Nurse	CHC
8	Ngoo	14	Upper Kuiva	Mandu	Always	20	20	Yes	Primary	Islam	Mende	2	2	2	Married	Farmer	30-60	None	Farmer	Urban	Modern	Pit/others	Yes	TBA	CHC	No	5	8	Yes	No	Yes	Yes	2	Yes	Yes	Midwife	CHC	1	Born alive	Normal	Yes	2hrs	MCHAide	Yes	2	TBA	Patient Home
9	Ngoo	14	Upper Kuiva	Mandu	Always	20	20	No	None	Islam	Mende	1	2	2	Married	Tailor	>60	None	Maison	Urban	Modern	pit/others	Yes	TBA	CHC	No	4	9	Yes	Yes	Yes	Yes	3	Yes	No	MCHAide	CHC	3	Born alive	Normal	Yes	2hrs	MCHAide	N0	0	0	0
10	Ngoo	14	Upper Kuiva	Mandu	Always	22	22	No	None	Islam	Mende	1	3	2	Married	Farmer	>60	Junior Secondary	Maison	Urban	Modern	Pit/others	Yes	TBA	CHC	No	3	8	Yes	No	Yes	Yes	2	Yes	No	MCHAide	CHC	1	Born alive	normal	Yes	1hrs	MCHAide	N0	0	0	0
11	Ngoo	14	upper Kuiva	Mandu	Always	33	33	Yes	Primary	Islam	Mende	5	6	2	Married	Farmer	>60	None	Farmer	Urban	Modern	Pit/others	Yes	TBA	CHC	No	5	8	Yes	Yes	Yes	Yes	2	Yes	Yes	Midwife	CHC	2hrs	Born alive	Normal	Yes	1hrs	MCHAide	Yes	2	Midwife	CHC
12	Mobai	4	Upper Kuiva	Mandu	Always	20	20	Yes	Junior Secondary	Islam	Mende	3	3	2	Married	Farmer	<30	Senior Secondary	Farmer	Urban	Natural	Pit/others	Yes	MCHAide	CHC	Yes	6	2	Yes	Yes	Yes	Yes	2	Yes	No	MCHAide	CHC	6hrs	Born alive	Normal	Yes	2hrs	MCHAide	N0	0	0	0
13	Mobai	4	Upper Kuiva	Mandu	Always	30	29	Yes	Primary	Islam	Mende	3	6	3	Married	Farmer	<30	Junior Secondary	Farmer	Urban	Natural	Pit/others	Yes	MCHAide	CHC	Yes	3	4	Yes	No	Yes	Yes	2	Yes	No	MCHAide	CHC	2hrs	Born alive	Normal	Yes	1hrs	MCHAide	N0	0	0	0
14	Baiima	4	Upper Kuiva	Mandu	2	19	19	No	None	Islam	Mende	1	1	1	Single	Tailor	30-60	No	No	Urban	Natural	Pit/others	Yes	MCHAide	CHC	Yes	3	5	Yes	Yes	Yes	Yes	Don’t Know	Yes	No	MCHAide	CHC	2hrs	Born alive	Normal	Yes	1hrs	MCHAide	Yes	1	MCHAide	Patient Home
15	Mobai	4	upper Kuiva	Mandu	Always	20	19	Yes	Junior Secondary	Islam	Mende	1	1	1	Married	Farmer	<30	senior Secondary	Farmer	Urban	Natural	Pit/others	Yes	Nurse	CHC	Yes	4	4	Yes	Yes	Yes	Yes	3	Yes	No	MCHAide	CHC	2hrs	Born alive	Normal	Yes	1hrs	MCHAide	N0	0	0	0
16	Mobai	4	Upper Kuiva	Mandu	Always	33	33	No	None	Islam	Mende	3	4	2	Married	Farmer	<30	None	Bike rider	Urban	Natural	Pit/others	Yes	MCHAide	CHC	Yes	3	5	Yes	Yes	Yes	Yes	2	Yes	No	MCHAide	CHC	8hrs	Born alive	Normal	Yes	1hrs	MCHAide	N0	0	0	0
17	Mobai	4	upper Kuiva	Mandu	<1	19	19	Yes	Junior Secondary	Islam	Mende	1	1	1	Married	Student	<30	Senior Secondary	Student	Urban	Natural	Pit/others	Yes	MCHAide	CHC	Yes	6	3	Yes	Yes	Yes	Yes	2	Yes	No	MCHAide	CHC	4hrs	Born alive	Normal	Yes	2hrs	MCHAide	Yes	1	MCHAide	Patient Home
18	Mobai	4	Upper Kuiva	Mandu	Always	31	31	Yes	Primary	Islam	Mende	3	3	2	Separated	Trader	30-60	Vocational	HCW	Urban	Modern	Pit/others	Yes	MCHAide	CHC	Yes	4	4	Yes	No	Yes	Yes	2	Yes	No	MCHAide	CHC	2	Born alive	Normal	Yes	2hrs	MCHAide	Yes	2	MCHAide	Patient Home
19	Mobai	4	Upper Kuiva	Mandu	Always	37	37	No	None	Islam	Mende	2	2	1	Married	Farmer	<30	None	Farmer	Urban	Modern	Pit/others	Yes	MCHAide	CHC	Yes	4	8	Yes	Yes	Yes	Yes	2	Yes	No	MCHAide	CHC	8hrs	Born alive	Normal	Yes	1hrs	MCHAide	Yes	2	MCHAide	Patient Home
20	Baiima	4	Gbongre	Mandu	2	18	18	Yes	Junior Secondary	Islam	Mende	1	1	1	Living together	Student	<30	Senior Secondary	Student	Urban	Modern	Pit/others	Yes	MCHAide	CHC	Yes	4	5	Yes	Yes	Yes	Yes	3	Yes	No	MCHAide	CHC	2hrs	Born alive	Normal	Yes	1hrs	MCHAide	N0	0	0	0
21	Tikonko	7	Lower Kuiva	Mandu	Always	23	23	Yes	Junior Secondary	Islam	Mende	3	3	2	Married	Farmer	>60	Vocational	Teacher	Rural	Modern	Pit/others	Yes	MCHAide	CHC	Yes	3	3	Yes	Yes	Yes	Yes	2	Yes	No	MCHAide	CHC	1hrs	Born alive	Normal	Yes	1hrs	MCHAide	N0	0	0	0
22	Tikonko	7	Lower Kuiva	Mandu	Always	32	31	No	None	Islam	Mende	4	5	2	Married	Farmer	>60	None	Farmer	Rural	Modern	Pit/others	Yes	MCHAide	CHC	Yes	3	8	Yes	Yes	Yes	Yes	2	Yes	No	MCHAide	CHC	4hrs	Born alive	Normal	Yes	3hrs	MCHAide	Yes	1	MCHAide	Patient Home
23	Mobai	4	Upper Kuiva	Mandu	Always	25	25	Yes	Junior Secondary	Islam	Mende	2	3	2	Single	Trader	<30	No	No	Urban	Modern	Pit/others	Yes	MCHAide	CHC	Yes	5	4	Yes	Yes	Yes	Yes	3	Yes	No	MCHAide	CHC	1hrs	Born alive	Normal	Yes	1hrs	MCHAide	Yes	2	MCHAide	Patient Home
24	Tikonko	7	Lower Kuiva	Mandu	Always	22	21	Yes	Senior Secondary	Islam	Mende	1	1	1	Married	Student	>60	Junior Secondary	Bike rider	Rural	Modern	Pit/others	Yes	MCHAide	CHC	Yes	4	6	Yes	Yes	Yes	Yes	2	Yes	No	MCHAide	CHC	3hrs	Born alive	Normal	Yes	1hrs	MCHAide	Yes	1	MCHAide	Patient Home
25	Mobai	4	Upper Kuiva	Mandu	3	19	19	Yes	Primary	Christian	Mende	1	1	1	Married	Farmer	<30	Junior Secondary	Tailor	Urban	Modern	Pit/others	Yes	MCHAide	CHC	Yes	3	4	Yes	Yes	Yes	Yes	3	Yes	No	MCHAide	CHC	5	Born alive	Normal	Yes	1hrs	MCHAide	Yes	1	MCHAide	Patient Home
26	Mobai	4	Upper Kuiva	Mandu	Always	31	31	Yes	Junior Secondary	Christian	Mende	3	3	1	Married	Trader	<30	Senior Secondary	Trader	Urban	Modern	Pit/others	Yes	Midwife	CHC	Yes	3	8	Yes	Yes	Yes	Yes	2	Yes	Yes	Midwife	CHC	3hrs	Born alive	Normal	Yes	1hrs	Midwife	Yes	1	MCHAide	Patient Home
27	Baiima	4	Gbongre	Mandu	Always	34	34	Yes	Senior Secondary	Islam	Mende	6	6	2	Married	Trader	<30	None	Trader	Urban	Modern	Pit/others	Yes	MCHAide	CHC	Yes	4	8	Yes	No	Yes	Yes	2	Yes	No	MCHAide	CHC	8hrs	Born alive	Normal	Yes	1hrs	MCHAide	Yes	1	MCHAide	Patient Home
28	Tikonko	7	Lower Kuiva	Mandu	Always	30	30	No	None	Islam	Mende	5	5	2	Married	Farmer	>60	None	Bike rider	Rural	Modern	Pit/others	Yes	MCHAide	CHC	Yes	3	4	Yes	Yes	Yes	Yes	4	Yes	No	MCHAide	CHC	1	Born alive	Normal	Yes	2hrs	MCHAide	N0	0	0	0
29	Tikonko	7	Lower Kuiva	Mandu	Always	23	23	Yes	Junior Secondary	Christian	Mende	3	3	2	Married	Farmer	>60	Senior Secondary	Court clerk	Rural	Modern	Pit/others	Yes	MCHAide	CHC	Yes	3	8	Yes	Yes	Yes	Yes	3	Yes	No	MCHAide	CHC	2	Born alive	Normal	Yes	1hrs	MCHAide	Yes	2	MCHAide	Patient Home
30	Tikonko	7	Lower Kuiva	Mandu	Always	35	34	No	None	Islam	Mende	6	8	2	Married	Farmer	>60	Junior Secondary	Farmer	Rural	Natural	Pit/others	Yes	MCHAide	CHC	Yes	3	5	Yes	Yes	Yes	Yes	2	Yes	No	MCHAide	CHC	1	Born alive	Normal	Yes	1hrs	MCHAide	Yes	1	MCHAide	Patient Home
31	Tikonko	7	Lower Kuiva	Mandu	Always	30	30	No	None	Christian	Mende	3	3	2	Married	Farmer	>60	Vocational	HCW	Rural	Modern	Pit/others	Yes	MCHAide	CHC	Yes	6	3	Yes	Yes	Yes	Yes	1	Yes	No	MCHAide	CHC	2	Born alive	Normal	Yes	2hrs	MCHAide	N0	0	0	0
32	Messima	14	Upper Kuiva	Mandu	Always	27	26	No	None	Islam	Mende	3	3	1	Married	Trader	30-60	Vocational	Teacher	Rural	modern	Pit/others	Yes	MCHAide	CHC	Yes	4	8	Yes	Yes	Yes	Yes	3	Yes	No	MCHAide	CHC	2hrs	Born alive	Normal	Yes	1hrs	MCHAide	Yes	3	MCHAide	Patient Home
33	Messima	14	Upper Kuiva	Mandu	Always	20	20	Yes	Junior Secondary	islam	Mende	1	2	2	Living together	Student	30-60	Senior Secondary	Student	Rural	Modern	Pit/others	Yes	MCHAide	CHC	Yes	5	4	Yes	Yes	Yes	Yes	3	Yes	No	MCHAide	CHC	2	Born alive	Normal	Yes	1hrs	MCHAide	Yes	3	CHW	Patient Home
34	Messima	14	Upper Kuiva	Mandu	Always	25	25	Yes	Junior Secondary	Islam	Mende	2	3	2	Married	Trader	30-60	Senior Secondary	Farmer	Rural	Modern	Pit/others	Yes	Midwife	CHC	Yes	5	8	Yes	Yes	Yes	Yes	3	Yes	Yes	Midwife	CHC	1	Born alive	Normal	Yes	1hrs	MCHAide	Yes	7	Midwife	CHC
35	Messima	14	Upper Kuiva	Mandu	Always	18	17	Yes	Senior Secondary	Islam	Mende	1	1	1	Living together	Student	30-60	Primary	Farmer	Rural	Natural	Pit/others	Yes	MCHAide	CHC	Yes	3	8	Yes	Yes	Yes	Yes	2	Yes	No	MCHAide	CHC	10hrs	Born alive	Normal	Yes	1hrs	MCHAide	Yes	4hrs	MCHAide	Patient Home
36	Messima	14	Upper Kuiva	Mandu	Always	30	30	No	None	Islam	Mende	5	5	2	Married	Farmer	30-60	Primary	Farmer	Rural	Natural	Pit/others	Yes	Midwife	CHC	Yes	6	4	Yes	No	Yes	Yes	3	Yes	Yes	Midwife	CHC	8hrs	Born alive	Normal	Yes	1hrs	Midwife	N0	0	0	0
37	Ngoo	14	Upper Kuiva	Mandu	Always	30	30	No	None	Islam	Mende	4	9	1	Married	farmer	>60	None	Farmer	Rural	Natural	Pit/others	Yes	MCHAide	CHC	Yes	3	8	Yes	Yes	Yes	Yes	2	Yes	No	MCHAide	CHC	2hrs	Born alive	Normal	Yes	1hrs	MCHAide	Yes	2	TBA	Patient Home
38	Messima	14	Upper Kuiva	Mandu	Always	30	30	No	None	Islam	Mende	7	7	2	Married	Farmer	>60	Senior Secondary	Farmer	Rural	Natural	Pit/others	Yes	Midwife	CHC	Yes	4	4	Yes	No	Yes	Yes	1	Yes	Yes	Midwife	CHC	10hrs	Born alive	Normal	Yes	1hrs	Midwife	N0	0	0	0
39	Sengama	5	Buiima	Penguia	Always	32	31	Yes	Junior Secondary	Christian	Mende	4	5	3	Married	Farmer	>60	Primary	Farmer	Rural	Natural	Pit/others	Yes	Nurse	CHP	Yes	6	4	Yes	Yes	Yes	Yes	3	Yes	No	MCHAide	CHP	21	Born alive	Normal	Yes	1hrs	MCHAide	Yes	3	MCHAide	CHP
40	Sengama	5	Buiima	Penguia	Always	19	18	Yes	Junior Secondary	Christian	Mende	1	1	1	Married	Farmer	>60	None	Farmer	Rural	Natural	Pit/others	Yes	Nurse	CHP	Yes	3	5	Yes	Yes	Yes	Yes	4	Yes	No	MCHAide	CHP	4	Born alive	Normal	Yes	1hrs	MCHAide	Yes	4	MCHAide	CHP
41	Sengama	5	Buiima	Penguia	10	28	26	Yes	Junior Secondary	Christian	Mende	5	6	3	Married	Trader	30-60	Junior Secondary	Carpenter	Rural	Natural	Pit/others	Yes	Nurse	CHP	Yes	6	5	Yes	No	Yes	Yes	3	Yes	No	MCHAide	CHP	2	Born alive	Normal	Yes	3hrs	MCHAide	Yes	5	MCHAide	CHP
42	Sengama	5	Buiima	Penguia	Always	27	26	Yes	Junior Secondary	Islam	Mende	2	2	1	Married	Farmer	>60	Senior Secondary	Farmer	Rural	Natural	Pit/others	Yes	Nurse	CHP	Yes	3	4	Yes	Yes	Yes	Yes	3	Yes	No	MCHAide	CHP	2	Born alive	Normal	Yes	5hrs	MCHAide	Yes	7	MCHAide	CHP
43	Sengama	5	Buiima	Penguia	Always	36	35	No	None	Islam	Mende	6	6	4	Married	Farmer	>60	Junior Secondary	Farmer	Rural	Natural	Pit/others	Yes	Nurse	CHP	Yes	2	5	Yes	Yes	Yes	Yes	4	Yes	No	MCHAide	CHP	5	Born alive	Normal	Yes	3hrs	MCHAide	Yes	5	MCHAide	CHP
44	Sengama	5	Buiima	Penguia	Always	30	30	Yes	Primary	Christian	Mende	5	5	4	Married	Farmer	>60	Junior Secondary	Farmer	Rural	Natural	Pit/others	Yes	Nurse	CHP	Yes	3	5	Yes	Yes	Yes	Yes	4	Yes	No	MCHAide	CHP	3	Born alive	Normal	Yes	4hrs	MCHAide	Yes	6	MCHAide	CHP
45	Sengama	5	Buiima	Penguia	6	39	38	No	None	Christian	Kono	5	5	2	Married	Farmer	>60	None	Farmer	Rural	Natural	Pit/others	Yes	Nurse	CHP	Yes	3	3	Yes	Yes	Yes	Yes	2	Yes	No	MCHAide	CHP	4	Born alive	Normal	Yes	5hrs	MCHAide	Yes	7	MCHAide	CHP
46	Sengama	5	Buiima	Penguia	Always	30	28	No	None	Christian	Mende	5	6	3	Married	Farmer	>60	None	Farmer	Rural	Natural	Pit/others	Yes	Nurse	CHP	Yes	3	4	Yes	Yes	Yes	Yes	2	Yes	No	MCHAide	CHP	2	Born alive	Normal	Yes	4hrs	MCHAide	Yes	3	MCHAide	CHP
47	Sengama	5	Buiima	Penguia	Always	19	17	Yes	Junior Secondary	Christian	Mende	1	1	1	Divorced	Farmer	>60	No	No	Rural	Natural	Pit/others	Yes	Nurse	CHP	Yes	3	3	Yes	Yes	Yes	Yes	3	Yes	No	MCHAide	CHP	3	Born alive	Normal	Yes	4hrs	MCHAide	Yes	5	MChAide	CHP
48	Sengama	5	Buiima	Penguia	Always	25	23	No	None	Christian	Mende	5	6	2	Married	Farmer	30-60	None	Farmer	Rural	Natural	Pit/others	Yes	Nurse	CHP	Yes	3	3	Yes	Yes	Yes	Yes	3	Yes	No	MCHAide	CHP	3	Born alive	Normal	Yes	3	MCHAide	Yes	8	MCHAide	CHP
49	Sellu	5	Lombama	Penguia	Always	25	23	Yes	Junior Secondary	Christian	Mende	2	3	2	Married	Farmer	30-60	Vocational	Teacher	Rural	Natural	Pit/others	Yes	TBA	CHP	No	3	5	Yes	No	Yes	Yes	2	Don’t know	No	TBA	CHP	3	Born alive	Normal	Yes	3	TBA	N0	0	0	0
50	Sellu	5	Lombama	Penguia	Always	35	33	No	None	Christian	Mende	6	6	2	Married	Farmer	>60	None	Farmer	Rural	Natural	Pit/others	Yes	Nurse	CHP	Yes	4	5	Yes	No	Yes	Yes	3	Yes	No	MCHAide	CHP	3	Born alive	Normal	No	0	0	N0	0	0	0
51	Sellu	5	Lombama	Penguia	Always	36	34	No	None	Christian	Kono	6	8	2	Married	Farmer	>60	Junior Secondary	Farmer	Rural	Natural	Pit/others	Yes	Nurse	CHP	Yes	4	3	Yes	Yes	Yes	Yes	2	Yes	No	MCHAide	CHP	2	Born alive	Normal	Yes	2hrs	MCHAide	Yes	5hrs	MCHAide	CHP
52	Sellu	5	Lombama	Penguia	Always	36	35	No	None	Islam	Mende	7	9	3	Married	Farmer	>60	None	Farmer	Rural	Natural	Pit/others	Yes	Nurse	CHP	Yes	3	5	Yes	Yes	Yes	Yes	3	Yes	No	MCHAide	CHP	3	Born alive	Normal	Yes	7	MCHAide	N0	0	0	0
53	Sellu	5	Lombama	Penguia	Always	28	27	Yes	Primary	Christian	Kissi	1	1	1	Married	Farmer	30-60	Primary	Farmer	Rural	natural	Pit/others	Yes	Nurse	CHP	Yes	3	4	Yes	Yes	Yes	Yes	1	Yes	No	TBA	CHP	3	Born alive	Normal	Yes	3hrs	MCHAide	N0	0	0	0
54	Sellu	5	Lombama	Penguia	3	20	18	No	None	Christian	Mende	1	1	1	Married	Farmer	30-60	None	Farmer	Rural	Natural	Pit/others	Yes	TBA	CHP	No	3	3	Yes	Yes	Yes	Yes	Don’t Know	Yes	No	TBA	CHP	1	Born alive	Normal	Yes	3hrs	TBA	N0	0	0	0
55	Sellu	5	Lombama	Penguia	Always	30	29	Yes	Primary	Islam	Kissi	4	5	2	Married	Farmer	30-60	None	Farmer	Rural	Natural	Pit/others	Yes	Nurse	CHP	Yes	5	4	Yes	No	Yes	Yes	2	Yes	No	TBA	CHP	3	Born alive	Normal	Yes	4hrs	MCHAide	Yes	7	TBA	Patient Home
56	Sellu	5	Lombama	Penguia	Always	36	36	No	None	Christian	Kissi	4	5	1	Married	Farmer	<30	None	Farmer	Rural	Natural	Pit/others	Yes	Nurse	CHP	Yes	3	5	Yes	No	Yes	Yes	3	Yes	No	MCHAide	CHP	3	Born alive	Normal	N0	0	0	N0	0	0	0
57	Sellu	5	Lombama	Penguia	5	18	17	No	None	Islam	Mende	4	4	2	Married	Farmer	<30	None	Farmer	Rural	Natural	Pit/others	Yes	Nurse	CHP	Yes	5	5	Yes	Yes	Yes	Yes	2	Yes	No	MCHAide	CHP	3	Born alive	Normal	Yes	5	MCHAide	N0	0	0	0S
58	Sellu	5	Lombama	Penguia	Always	25	23	No	None	Christian	Mende	3	4	2	Single	Farmer	>60	No	No	Rural	Natural	Pit/others	Yes	Nurse	CHP	Yes	3	4	Yes	Yes	Yes	Yes	3	Yes	No	MCHAide	CHP	3	Born alive	Normal	Yes	3hrs	MCHAide	Yes	5hrs	MCHAide	Patient Home
59	Gawama	1	Upper Samie	Malema	Always	30	30	Yes	Primary	Islam	Mende	4	4	1	Married	Farmer	30-60	None	Farmer	Rural	Natural	Pit/others	Yes	Midwife	CHC	Yes	Don’t know	8	Yes	Yes	Yes	Yes	2	Yes	Yes	Midwife	CHC	3	Born alive	Normal	Yes	3hrs	MCHAide	Yes	4hrs	CHW	Patient Home
60	Gawama	1	Upper Samie	Malema	Always	35	34	No	None	Islam	Mende	5	5	1	Married	Farmer	30-60	None	Farmer	Rural	Natural	Pit/others	Yes	Midwife	CHC	Yes	5	8	Yes	Yes	Yes	Yes	2	Yes	Yes	Midwife	CHC	3	Born alive	Normal	Yes	1hrs	Midwife	Yes	3hrs	CHW	Patient Home
61	Gawama	1	Upper Samie	Malema	3	22	21	Yes	Primary	Islam	Mende	2	2	2	Married	Farmer	30-60	None	Farmer	Rural	Natural	Pit/others	Yes	Midwife	CHC	Yes	6	4	Yes	Yes	Yes	Yes	2	Yes	Yes	Midwife	CHC	2	Born alive	Normal	Yes	2hrs	MCHAide	Yes	5hrs	CHW	Patient Home
62	Gawama	1	Upper Samie	Malema	Always	19	18	Yes	Junior Secondary	Islam	Mende	1	2	1	Married	Housewife	30-60	None	Carpenter	Rural	Natural	Pit/others	Yes	Midwife	CHC	Yes	3	8	Yes	Yes	Yes	Yes	3	Yes	Yes	Midwife	CHC	3	Born alive	Normal	Yes	3hrs	Midwife	Yes	5hrs	CHW	Patient Home
63	Gawama	1	Upper Samie	Malema	Always	30	30	No	None	Islam	Mende	7	8	2	Married	Farmer	30-60	None	Farmer	Rural	Natural	Pit/others	Yes	Midwife	CHC	Yes	4	5	Yes	Yes	Yes	Yes	2	Yes	Yes	Midwife	CHC	3	Born alive	Normal	Yes	2hrs	Midwife	N0	0	0	0
64	Gawama	1	Upper Samie	Malema	Always	25	24	Yes	Primary	Islam	Mende	4	4	2	Married	Farmer	30-60	Vocational	Teacher	Rural	Natural	Pit/others	Yes	Midwife	CHC	Yes	3	8	Yes	Yes	Yes	Yes	2	Yes	Yes	Midwife	CHC	1	Born alive	Normal	Yes	1hrs	Midwife	Yes	7	CHW	Patient Home
65	Gawama	1	Upper Samie	Malema	Always	37	36	No	None	Islam	Mende	6	6	2	Married	Farmer	30-60	Primary	Farmer	Rural	Natural	Pit/others	Yes	Midwife	CHC	Yes	3	6	Yes	Yes	Yes	Yes	2	Yes	Yes	Midwife	CHC	6hrs	Born alive	Normal	Yes	2hrs	MCHAide	Yes	6	CHW	Patient Home
66	Gawama	1	Upper Samie	Malema	3	25	25	No	None	Islam	Mende	4	4	2	Married	Farmer	30-60	Primary	Bike rider	Rural	Natural	Pit/others	Yes	Midwife	CHC	Yes	3	8	Yes	Yes	Yes	Yes	2	Yes	Yes	Midwife	CHC	3	Born alive	Normal	Yes	1hrs	MIdwife	N0	0	0	0
67	Gawama	1	Upper Samie	Malema	4	30	29	No	None	Islam	Mende	4	7	1	Married	Farmer	30-60	None	Farmer	Rural	Natural	Pit/others	Yes	Midwife	CHC	Yes	5	6	Yes	No	Yes	Yes	2	Yes	Yes	Midwife	CHC	4	Born alive	Normal	Yes	2hrs	Midwife	Yes	4	CHW	Patient Home
68	Gawama	1	Upper Samie	Malema	Always	29	28	No	None	Islam	Mende	4	4	2	Married	Farmer	30-60	None	Farmer	Rural	Natural	Pit/others	Yes	Midwife	CHC	Yes	3	3	Yes	Yes	Yes	Yes	2	Yes	Yes	Midwife	CHC	3	Born alive	Normal	Yes	1hrs	Midwife	Yes	1hrs	CHW	Patient Home
69	Tewar	6	Njagbla	Malema	Always	28	28	Yes	Primary	Islam	Mende	4	4	2	Married	Farmer	30-60	None	Farmer	Rural	Natural	Pit/others	Yes	Midwife	CHC	Yes	3	8	Yes	Yes	Yes	Yes	2	Yes	Yes	Midwife	CHC	8hrs	Born alive	Normal	Yes	2hrs	Midwife	Yes	8hrs	TBA	Patient Home
70	Tewar	6	Njagbla	Malema	Always	35	34	No	None	Islam	Kissi	6	6	2	Married	Farmer	30-60	None	farmer	Rural	Natural	Pit/others	Yes	midwife	CHC	Yes	3	6	Yes	Yes	Yes	Yes	2	Yes	Yes	Midwife	CHC	1hrs	Born alive	Normal	Yes	1hrs	MCHAide	Yes	1	TBA	Patient Home
71	Tewar	6	Njagbla	Malema	Always	19	19	Yes	Primary	Islam	Mende	1	1	1	Married	Farmer	30-60	None	Farmer	Rural	Natural	Pit/others	Yes	Midwife	CHC	Yes	4	9	Yes	Yes	Yes	Yes	2	Yes	Yes	Midwife	CHC	3	Born alive	Normal	Yes	2hrs	Midwife	Yes	6	CHW	Patient Home
72	Tewar	6	Njagbla	Malema	Always	20	20	Yes	Junior Secondary	Islam	Mende	3	3	2	Living together	Farmer	>60	None	Farmer	Rural	Natural	Pit/others	Yes	MCHAide	CHP	Yes	2	6	Yes	Yes	Yes	Yes	2	Yes	No	MCHAide	CHP	3	Born alive	Normal	Yes	2hrs	MCHAide	N0	0	0	0
73	Nagbana	6	Njagbla	Malema	Always	28	28	Yes	Primary	Islam	Mende	3	3	2	Married	Farmer	>60	None	Farmer	Rural	Natural	Pit/others	Yes	MCHAide	CHP	Yes	3	8	Yes	Yes	Yes	Yes	2	Yes	No	MCHAide	CHP	3	Born alive	Normal	Yes	1hrs	MCHAide	Yes	6	MCHAide	Patient Home
74	Kpetema	6	Njagbla	Malema	Always	18	18	Yes	Junior Secondary	Christian	Mende	1	1	1	Single	Student	>60	No	No	Rural	Natural	Pit/others	Yes	MCHAide	MCHP	Yes	3	8	Yes	Yes	Yes	Yes	2	Yes	No	MCHAide	MCHP	1hrs	Born alive	Normal	Yes	1	MCHAide	Yes	1	CHW	Patient Home
75	Gandohun	6	Njagbla	Malema	Always	21	21	Yes	Junior Secondary	Islam	Mende	2	2	1	Married	Farmer	30-60	None	Farmer	Rural	Natural	Pit/others	Yes	MCHAide	CHP	Yes	4	7	Yes	Yes	Yes	Yes	2	Yes	No	MCHAide	CHP	1hrs	Born alive	Normal	Yes	1hrs	MCHAide	Yes	5	MCHAide	Patient Home
76	Bendu	6	Njagbla	Malema	4	27	26	No	None	Islam	Mende	2	2	2	Married	Farmer	>60	None	Farmer	Rural	Natural	Pit/others	Yes	MCHAide	CHP	Yes	3	6	Yes	Yes	Yes	Yes	2	Yes	No	MCHAide	CHP	1hrs	Born alive	Normal	Yes	1hrs	MCHAide	Yes	3hrs	TBA	Patient Home
77	Bendu	6	Njagbla	Malema	Always	30	30	No	None	Islam	Mende	3	3	1	Married	Farmer	>60	None	Farmer	Rural	Natural	Pit/others	Yes	MCHAide	CHP	Yes	3	9	Yes	Yes	Yes	Yes	2	Yes	No	MCHAide	CHP	1hrs	Born alive	Normal	Yes	1hrs	MCHAide	Yes	1hrs	TBA	Patient Home
78	Kpetema	6	Njagbla	Malema	Always	30	29	Yes	Primary	Islam	Mende	4	4	2	Married	Farmer	>60	Primary	Farmer	Rural	Natural	Pit/others	Yes	Midwife	CHC	Yes	3	8	Yes	Yes	Yes	Yes	2	Yes	Yes	Midwife	CHC	1hrs	Born alive	Normal	Yes	2hrs	Midwife	Yes	3hrs	CHW	Patient Home
79	Kaikor Yeihun	3	Lower Samie	Malema	3	30	29	No	None	Islam	Mende	3	4	2	Married	Farmer	30-60	Junior Secondary	Farmer	Rural	Natural	Pit/others	Yes	MCHAide	MCHP	Yes	4	7	Yes	Yes	Yes	Yes	2	Yes	No	MCHAide	MCHP	3	Born alive	Normal	Yes	4hrs	MCHAide	Yes	5	TBA	Patient Home
80	Kaikor Yeihun	3	Lower Samie	Malema	Always	25	25	Yes	Primary	Christian	Mende	4	4	2	Married	Farmer	<30	Junior Secondary	Farmer	Rural	Natural	Pit/others	Yes	MCHAide	CHC	Yes	3	5	Yes	Yes	Yes	Yes	2	Yes	No	MCHAide	MCHP	3	Born alive	Normal	Yes	5hrs	MCHAide	N0	0	0	0
81	Baka	3	Lower Samie	Malema	Always	23	22	Yes	Junior Secondary	Christian	Mende	2	3	1	Living together	Housewife	30-60	Higher	Accountant	Rural	Natural	Pit/others	Yes	MCHAide	MCHP	Yes	3	8	Yes	Yes	Yes	Yes	2	Yes	No	MCHAide	MCHP	3	Born alive	Normal	Yes	3hrs	MCHAide	Yes	3hrs	CHW	Patient Home
82	Baka	3	Lower Samie	Malema	3	22	22	No	None	Islam	Mende	4	4	2	Living together	Housewife	30-60	Junior Secondary	Bike rider	Rural	Natural	Pit/others	Yes	Midwife	CHC	Yes	3	7	Yes	Yes	Yes	Yes	3	Yes	Yes	Midwife	CHC	3	Born dead	Assisted	Yes	1hrs	Midwife	Yes	3hrs	CHW	Patient Home
83	Baka	3	Lower Samie	Malema	Always	20	20	Yes	Primary	Christian	Mende	3	3	1	Married	Trader	30-60	Senior Secondary	Bike rider	Rural	Natural	Pit/others	Yes	MCHAide	MCHP	Yes	2	9	Yes	Yes	Yes	Yes	2	Yes	No	MCHAide	MCHP	3	Born alive	Normal	Yes	2hrs	MCHAide	Yes	6hrs	CHW	Patient Home
84	Kaikor Yeihun	3	Lower Samie	Malema	Always	20	19	Yes	Primary	Christian	Mende	1	1	1	Married	Housewife	<30	Junior Secondary	Farmer	Rural	Natural	Pit/others	Yes	MCHAide	MCHP	Yes	3	5	Yes	Yes	Yes	Yes	2	Yes	No	MCHAide	MCHP	3	Born alive	Normal	Yes	3hrs	MChAide	Yes	5	MCHAide	Patient Home
85	Bafehun	3	Lower Samie	Malema	Always	22	21	Yes	Primary	Islam	Mende	3	3	2	Married	Farmer	30-60	None	Farmer	Rural	Natural	Pit/others	Yes	MCHAide	MCHP	Yes	3	6	Yes	Yes	Yes	Yes	2	Yes	No	MCHAide	MCHP	3	Born alive	Normal	Yes	2hrs	MCHAide	Yes	5hrs	TBA	Patient Home
86	Bafehun	3	Lower Samie	Malema	Always	20	20	Yes	Primary	Islam	Kissi	1	1	1	Married	Farmer	30-60	None	Miner	Rural	Natural	Pit/others	Yes	MCHAide	MCHP	Yes	4	4	Yes	Yes	Yes	Yes	2	Yes	No	MCHAide	MCHP	3	Born alive	Normal	Yes	3hrs	MCHAide	Yes	3hrs	TBA	Patient Home
87	Kamatahun	3	Lower Samie	Malema	3	19	19	Yes	Primary	Islam	Mende	2	2	1	Married	Farmer	30-60	Senior Secondary	Student	Rural	Natural	Pit/others	Yes	MCHAide	MCHP	Yes	Don’t know	4	Yes	Yes	Yes	Yes	2	Yes	No	MCHAide	MCHP	3	Born alive	Normal	Yes	3hrs	MCHAide	Yes	4	TBA	Patient Home
88	Kamatahun	3	Lower Samie	Malema	Always	28	27	Yes	Primary	Islam	Mende	4	4	2	Married	Farmer	30-60	None	Farmer	Rural	Natural	Pit/others	Yes	MCHAide	MCHP	Yes	3	6	Yes	Yes	Yes	Yes	2	Yes	No	MCHAide	MCHP	3	Born alive	Normal	Yes	4hrs	MCHAide	Yes	1	TBA	Patient Home
89	Sellu	5	Lombama	Penguia	4	18	16	No	None	Islam	Mende	1	1	1	Married	Farmer	30-60	None	Farmer	Rural	Modern	Pit/others	Yes	Nurse	CHP	Yes	3	5	Yes	Yes	Yes	Yes	4	Yes	No	MCHAide	CHP	3	Born alive	Normal	Yes	3hrs	MCHAide	N0	0	0	0
90	Niahun Gbuyama	2	Sei 2	Njaluahun	13	32	31	No	None	Islam	Mende	4	5	2	Married	Housewife	<30	None	Trader	Rural	Modern	Pit/others	Yes	Nurse	CHP	Yes	3	5	Yes	Yes	Yes	Yes	3	Yes	No	MCHAide	CHP	3	Born alive	Normal	Yes	4	MCHAide	Yes	9	MCHAide	Patient Home
91	Niahun Gbuyama	2	Sei 2	Njaluahun	Always	33	31	Yes	Primary	Christian	Mende	2	3	2	Married	Trader	<30	None	Farmer	Rural	Natural	Pit/others	Yes	Nurse	CHP	Yes	4	6	Yes	Yes	Yes	Yes	3	Yes	No	Nurse	CHP	3	Born alive	Normal	Yes	1hrs	Nurse	Yes	1	Nurse	Patient Home
92	Niahun Gbuyama	2	Sei 2	Njaluahun	Always	19	18	Yes	Senior Secondary	Islam	Mende	2	2	2	Single	Housewife	<30	No	No	Rural	Modern	Pit/others	Yes	Midwife	CHP	Yes	5	4	Yes	Yes	Yes	Yes	2	Yes	No	Nurse	CHP	3	Born alive	Normal	Yes	1hrs	Nurse	Yes	2	Nurse	Patient Home
93	Niahun Gbuyama	2	Sei 2	Njaluahun	Always	29	27	No	None	Christian	Mende	2	3	1	Married	Farmer	<30	No	Miner	Rural	Natural	Pit/others	Yes	Nurse	CHP	Yes	5	4	Yes	Yes	Yes	Yes	3	Yes	No	Nurse	CHP	3	Born alive	Normal	Yes	1hrs	Nurse	Yes	2	Nurse	Patient Home
94	Niahun Gbuyama	2	Sei 2	Njaluahun	Always	33	31	Yes	Primary	Christian	Mende	4	5	1	Married	Farmer	<30	Junior Secondary	Miner	Rural	Natural	Pit/others	B	Nurse	CHP	Yes	1	5	Yes	Yes	Yes	Yes	5	Yes	No	Nurse	CHP	3	Born alive	Normal	Yes	!hrs	Nurse	Yes	7	Nurse	Patient Home
95	Niahun Gbuyama	2	Sei 2	Njaluahun	3	19	17	Yes	Junior Secondary	Christian	Mende				Separated	Hair dresser	<30	No	No	Rural	Natural	Pit/others	Yes	Nurse	CHP	Yes	2	5	Yes	Yes	Yes	Yes	5	Yes	No	Nurse	CHP	3	Born alive	normal	Yes	1hrs	Nurse	Yes	3	MCHAide	Patient Home
96	Kekehun	2	Bumasadu	Kissi Teng	6	27	26	No	None	Christian	Kissi	2	2	2	Married	Farmer	>60	Primary	Carpenter	Rural	Natural	Pit/others	Yes	Nurse	CHC	Yes	4	4	Yes	No	Yes	Yes	3	Yes	No	MCHAide	CHC	3	Born alive	Normal	Yes	1	MCHAide	Yes	2	CHW	Patient Home
97	Kekehun	2	Bumasadu	Kissi Teng	2	35	33	No	None	Christian	Kissi	3	3	2	Living together	Farmer	>60	Primary	Farmer	Rural	Natural	Pit/others	Yes	Nurse	CHC	Yes	3	7	Yes	Yes	Yes	Yes	2	Yes	No	MCHAide	CHC	3	Born alive	Normal	Yes	3hrs	MCHAide	N0	0	0	0
98	Kekehun	2	Bumasadu	Kissi Teng	10	30	30	Yes	Primary	Christian	Kissi	5	5	2	Married	Farmer	>60	Junior Secondary	Farmer	Rural	Natural	Pit/others	Yes	Nurse	CHC	Yes	3	4	Yes	Yes	Yes	Yes	2	Yes	No	MCHAide	CHC	2	Born alive	Normal	Yes	2hrs	MCHAide	N0	0	0	0
99	Yalamba	2	Bumasadu	Kissi Teng	15	30	29	No	None	Christian	Kissi	2	2	1	Living together	Farmer	>60	None	Maison	Rural	Natural	Pit/others	Yes	Nurse	CHC	Yes	4	5	Yes	Yes	Yes	Yes	3	Yes	No	MCHAide	CHC	3	Born alive	Normal	Yes	4hrs	MCHAide	Yes	4	CHW	Patient Home
100	Yalamba	2	Bumasadu	Kissi Teng	9	24	24	Yes	Primary	Christian	Kissi	3	3	2	Married	Farmer	>60	Junior Secondary	CHW	Rural	Modern	Pit/others	Yes	Nurse	CHC	Yes	3	6	Yes	Yes	Yes	Yes	2	Yes	No	MCHAide	CHC	3	Born alive	Normal	Yes	3hrs	MCHAide	N0	0	0	0
101	Yalamba	2	Bumasadu	Kissi Teng	9	25	23	Yes	Primary	Christian	Kissi	2	2	1	Married	Farmer	>60	Junior Secondary	Carpenter	Rural	Modern	Pit/others	Yes	Doctor	CHC	Yes	2	6	Yes	Yes	Yes	Yes	3	Yes	No	MCHAide	CHC	3	Born alive	Normal	Yes	3hrs	MCHAide	Yes	3	CHW	Patient Home
102	Yalamba	2	Bumasadu	Kissi Teng	8	20	19	Yes	Junior Secondary	Christian	Kissi	1	1	1	Living together	Farmer	>60	Junior Secondary	Farmer	Rural	Natural	Pit/others	Yes	Nurse	MCHP	Yes	3	4	Yes	Yes	Yes	Yes	3	Yes	No	MCHAide	MCHP	3	Born alive	Normal	Yes	3hrs	MCHAide	N0	0	0	0
103	Bondee	2	Bumasadu	Kissi Teng	4	37	36	Yes	Primary	Christian	Kissi	4	4	1	Married	Farmer	>60	Primary	Farmer	Rural	Natural	Pit/others	Yes	Nurse	CHP	Yes	4	6	Yes	Yes	Yes	Yes	2	Yes	No	MCHAide	CHC	3	Born alive	Normal	Yes	2hrs	MCHAide	Yes	3	CHW	Patient Home
104	Bondee	2	Bumasadu	Kissi Teng	5	25	23	Yes	Primary	Christian	Kissi	2	2	1	Married	Farmer	>60	Senior Secondary	Teacher	Rural	Natural	Pit/others	Yes	Nurse	CHC	Yes	3	8	Yes	Yes	Yes	Yes	2	Yes	Yes	Doctor	Hospital	11	Born alive	CS	Yes	1hrs	Doctor	N0	0	0	0
105	Bondee	2	Bumasadu	Kissi Teng	5	25	23	No	None	Christian	Kissi	2	2	1	Married	Farmer	>60	Junior Secondary	Farmer	Rural	Natural	Pit/others	Yes	Nurse	CHC	Yes	3	5	Yes	Yes	Yes	Yes	2	Yes	No	MCHAide	CHC	3	Born alive	Normal	Yes	2hrrs	MCHAide	N0	0	0	0
106	Bandakolo	5	Lela	Kissi Teng	20	30	28	Yes	Primary	Christian	Kissi	3	3	1	Living together	Farmer	>60	Junior Secondary	Farmer	Rural	Modern	Pit/others	Yes	Nurse	CHC	Yes	3	5	Yes	Yes	Yes	Yes	2	Yes	Yes	MIdwife	CHC	3	Born alive	Normal	Yes	2hrs	MCHAide	N0	0	0	0
107	Bandakolo	5	Lela	Kissi Teng	15	20	19	Yes	Primary	Christian	Kissi	1	1	1	Single	Farmer	>60	None	Bike rider	Rural	Natural	Pit/others	Yes	Nurse	CHC	Yes	4	2	Yes	Yes	Yes	Yes	2	Yes	Yes	Midwife	Hospital	3	Born alive	Normal	Yes	1	Midwife	N0	0	0	0
108	Bandakolo	5	Lela	Kissi Teng	10	23	22	Yes	Senior Secondary	Christian	Kissi	2	2	2	Living together	Farmer	>60	No	No	Rural	Modern	Pit/others	Yes	Midwife	CHC	Yes	3	4	Yes	Yes	Yes	Yes	1	Yes	Yes	Doctor	Hospital	1	Born alive	CS	Yes	1hrs	Midwife	Yes	3	Midwife	Patient Home
109	Bandakolo	5	Lela	Kissi Teng	5	17	16	No	None	Christian	Kissi	1	1	1	Living together	Farmer	>60	Primary	Farmer	Rural	Natural	Pit/others	Yes	Nurse	CHC	Yes	3	4	Yes	Yes	Yes	Yes	2	Yes	Yes	Doctor	Hospital	7	Born alive	CS	Yes	1hrs	Doctor	Yes	2	Midwife	Patient Home
110	Palama	5	Lela	Kissi Teng	3	20	19	Yes	Junior Secondary	Christian	Kissi	2	2	2	Married	Farmer	>60	Junior Secondary	Farmer	Rural	Natural	Pit/others	Yes	Midwife	CHC	Yes	4	6	Yes	Yes	Yes	Yes	2	Yes	Yes	Midwife	CHC	2	Born alive	Normal	Yes	2hrs	Midwife	N0	0	0	0
111	Palama	5	Lela	Kissi Teng	4	22	21	Yes	Primary	Christian	Kissi	1	1	1	Living together	Farmer	>60	Junior Secondary	Farmer	Rural	Natural	Pit/others	Yes	Nurse	CHC	Yes	2	5	Yes	Yes	Yes	Yes	3	Yes	No	MCHAide	CHC	2	Born alive	Normal	Yes	1hrs	MCHAide	N0	0	0	0
112	Palama	5	Lela	Kissi Teng	10	20	19	Yes	Junior Secondary	Christian	Kissi	1	1	1	Living together	Farmer	>60	Junior Secondary	Farmer	Rural	Natural	Pit/others	Yes	Nurse	CHC	Yes	3	6	Yes	Yes	Yes	Yes	2	Yes	No	MCHAide	CHC	4	Born alive	Normal	Yes	2hrs	MCHAide	Yes	4	MCHAide	Patient Home
113	Bandakolo	5	Lela	Kissi Teng	5	20	19	No	None	Christian	Kissi	1	1	1	Single	Farmer	>60	No	No	Rural	Natural	Pit/others	Yes	Nurse	CHC	Yes	3	3	Yes	Yes	Yes	Yes	2	Yes	Yes	Midwife	Hospital	3	Born alive	Normal	Yes	1hrs	Midwife	N0	0	0	0
114	Palama	5	Lela	Kissi Teng	4	20	18	No	None	Christian	Kissi	1	1	1	Living together	Farmer	>60	Senior Secondary	Farmer	Rural	Natural	Pit/others	Yes	Nurse	CHC	Yes	4	6	Yes	Yes	Yes	Yes	2	Don’t know	No	MCHAide	CHC	7	Born alive	Normal	Yes	2hrs	MCHAide	N0	0	0	0
115	Palama	5	Lela	Kissi Teng	Always	36	35	Yes	Primary	Christian	Kissi	5	8	2	Married	Farmer	>60	None	Farmer	Rural	Natural	Pit/others	Yes	Nurse	CHC	Yes	4	5	Yes	No	Yes	Yes	0	Yes	No	MCHAide	CHC	7	Born alive	Normal	Yes	1hrs	MCHAide	N0	0	0	0
116	Kpongoma	5	Konio	Kissi Teng	Always	28	26	No	None	Christian	Kissi	3	4	1	Married	Farmer	>60	Primary	Farmer	Rural	Natural	Pit/others	Yes	TBA	CHC	No	3	6	Yes	Yes	Yes	Yes	Don’t Know	Yes	Yes	Midwife	CHC	2	Born alive	Normal	Yes	1hrs	MCHAide	Yes	14	TBA	Patient Home
117	Pailuan	5	Konio	Kissi Teng	1	23	21	Yes	Primary	Islam	Kissi	1	1	1	Married	Farmer	>60	Junior Secondary	Farmer	Rural	Natural	Pit/others	Yes	Nurse	CHP	Yes	3	6	Yes	Yes	Yes	Yes	Don’t Know	Yes	No	TBA	CHP	3	Born alive	Normal	Yes	1hrs	MCHAide	Yes	7	MCHAide	Patient Home
118	Pailuan	5	Konio	Kissi Teng	Always	25	24	Yes	Primary	Christian	Kissi	5	5	1	Married	Farmer	>60	None	Farmer	Rural	Natural	Pit/others	Yes	Nurse	CHC	Yes	3	7	Yes	Yes	Yes	Yes	2	Yes	No	MCHAide	CHC	3	Born alive	Normal	Yes	1hrs	MCHAide	Yes	14	TBA	Patient Home
119	Pailuan	5	konio	Kissi Teng	Always	30	28	No	None	Christian	Kissi	5	5	2	Married	Farmer	>60	Primary	Farmer	Rural	Natural	Pit/others	Yes	Nurse	CHC	Yes	5	Don’t know	Yes	Yes	Yes	Yes	1	Yes	Yes	Midwife	CHC	10	Born alive	Normal	Yes	2hrs	MCHAide	N0	0	0	0
120	Sokoma	5	Konio	Kissi Teng	Always	20	19	Yes	Junior Secondary	Christian	Kissi	1	1	1	Single	Farmer	>60	No	No	Rural	Natural	Pit/others	Yes	TBA	CHC	No	4	5	Yes	Yes	Yes	Yes	3	yes	Yes	Midwife	CHC	3	Born alive	Normal	Yes	1hrs	Midwife	Yes	3	TBA	Patient Home
121	Sokoma	5	Konio	Kissi Teng	Always	27	27	Yes	Primary	Christian	Kissi	2	3	1	Married	Farmer	>60	None	Farmer	Rural	Natural	Pit/others	Yes	TBA	CHC	No	Don’t know	6	Yes	Yes	Yes	Yes	2	Yes	Yes	Midwife	CHC	2	Born alive	Normal	Yes	2hrs	Midwife	Yes	12	TBA	Patient Home
122	Sokoma	5	Konio	Kissi Teng	5	20	20	No	None	Christian	Kissi	2	2	2	Married	Farmer	>60	Junior Secondary	Bike rider	Rural	Natural	Pit/others	Yes	Nurse	CHC	Yes	8	1	Yes	Yes	Yes	Yes	2	Yes	No	MChAide	CHC	3	Born alive	Normal	Yes	1hrs	MCHAide	Yes	14	TBA	Patient Home
123	Gbongoma	5	Konio	Kissi Teng	6	23	22	No	None	Christian	Kissi	2	2	2	Married	Farmer	>60	Vocational	Teacher	Rural	Natural	Pit/others	Yes	Nurse	CHC	Yes	3	6	Yes	Yes	Yes	Yes	Don’t Know	Yes	Yes	Midwife	CHC	3	Born alive	Normal	Yes	1hrs	Midwife	N0	0	0	0
124	Gbongoma	5	Konio	Kissi Teng	Always	30	30	No	None	Islam	Kissi	3	3	2	Married	Trader	>60	Vocational	Teacher	Rural	Modern	Pit/others	Yes	Nurse	CHC	Yes	3	7	Yes	Yes	Yes	Yes	2	Yes	Yes	Midwife	CHC	3	Born alive	Normal	Yes	1hrs	Midwife	Yes	11	MCHAide	Patient Home
125	Gbongoma	5	Konio	Kissi Teng	Always	21	19	Yes	Junior Secondary	Islam	Kissi	2	2	2	Married	Farmer	>60	None	Farmer	Rural	Natural	Pit/others	Yes	TBA	CHC	No	5	5	Yes	Yes	Yes	Yes	Don’t Know	Don’t know	Yes	Midwife	CHC	2	Born alive	Normal	Yes	1hrs	Midwife	N0	0	0	0
126	Koindu	3	Torli	Kissi Teng	Always	38	37	Yes	Junior Secondary	Islam	Mende	3	4	1	Married	Trader	<30	Vocational	Teacher	Urban	Modern	Pit/others	Yes	Nurse	CHC	Yes	3	6	Yes	Yes	Yes	Yes	2	Yes	Yes	Midwife	CHC	1	Born alive	Normal	Yes	2hrs	Midwife	Yes	4	MCHAide	CHC
127	Koindu	3	Torli	Kissi Teng	7	37	36	Yes	Junior Secondary	Christian	Kissi	3	4	1	Married	Trader	<30	Vocational	Teacher	Urban	Modern	Pit/others	Yes	Nurse	CHC	Yes	3	6	Yes	Yes	Yes	Yes	2	Yes	Yes	Midwife	CHC	3	Born alive	Normal	Yes	2hrs	Midwife	Yes	4	MCHAide	CHC
128	Koindu	3	Torli	Kissi Teng	5	29	29	Yes	Senior Secondary	Islam	Kissi	3	3	1	Married	Trader	<30	None	Trader	Urban	Modern	Pit/others	Yes	Nurse	CHC	Yes	3	7	Yes	Yes	Yes	Yes	2	Yes	Yes	Midwife	CHC	2	Born alive	Normal	Yes	2hrs	Midwife	Yes	3hrs	MCHAide	Patient Home
129	Koindu	3	Torli	Kissi Teng	3	35	33	Yes	Primary	Christian	Kissi	3	3	1	Married	Trader	<30	Senior Secondary	Electrician	Urban	Modern	Pit/others	Yes	Nurse	CHC	Yes	3	7	Yes	Yes	Yes	Yes	3	Yes	No	TBA	Ambulance	2hrs	Born alive	Normal	Yes	3hrs	TBA	N0	0	0	0
130	Koindu	3	Torli	Kissi Teng	4	21	21	Yes	Senior Secondary	Christian	Kissi	1	1	1	Single	Student	<30	No	No	Urban	Natural	Pit/others	Yes	Nurse	CHC	Yes	3	7	Yes	No	Yes	Yes	3	Yes	Yes	Midwife	CHC	3	Born alive	Normal	Yes	2hrs	Midwife	Yes	12	TBA	Patient Home
131	Koindu	3	Torli	Kissi Teng	5	37	36	No	None	Christian	Kissi	5	5	1	Married	Farmer	<30	Junior Secondary	Maison	Urban	Natural	Pit/others	Yes	TBA	CHC	No	6	5	Yes	Yes	Yes	No	2	Yes	Yes	Midwife	CHC	2	Born alive	Normal	Yes	2hrs	Midwife	N0	0	0	0
132	Koindu	3	Torli	Kissi Teng	4	25	23	No	None	Christian	Kissi	1	5	2	Married	Farmer	<30	None	Farmer	Urban	Natural	Pit/others	Yes	TBA	CHC	No	4	Don’t know	Yes	Yes	Yes	Yes	3	Yes	Yes	Midwife	CHC	2	Born alive	Normal	Yes	2hrs	Midwife	N0	0	0	0
133	Koindu	3	Torli	Kissi Teng	5	28	27	Yes	Primary	Islam	Fullah	4	5	2	Divorced	Trader	<30	No	No	Urban	Natural	Pit/others	Yes	Midwife	CHC	Yes	3	4	Yes	Yes	Yes	Yes	3	Yes	Yes	Midwife	CHC	3	Born alive	Normal	Yes	3hrs	Midwife	N0	0	0	0
134	Koindu	3	Torli	Kissi Teng	7	28	26	Yes	Senior Secondary	Islam	Creole	2	4	2	Married	Trader	<30	Higher	Student	Urban	Modern	Pit/others	Yes	Nurse	CHC	Yes	3	5	Yes	Yes	Yes	Yes	3	Yes	Yes	Midwife	CHC	3	Born alive	Normal	Yes	2hrs	Midwife	Yes	14	Midwife	Patient Home
135	Koindu	3	Torli	Kissi Teng	6	26	24	Yes	Senior Secondary	Islam	Kissi	4	4	1	Married	Trader	<30	Higher	Teacher	Urban	Modern	Pit/others	Yes	TBA	CHC	No	4	6	Yes	No	Yes	Yes	3	Yes	Yes	Midwife	CHC	3	Born alive	Normal	Yes	1hrs	Midwife	Yes	14	Midwife	Patient Home
136	Borbu	3	Kuiva Njagor	Yawei	20	30	23	No	None	Islam	Mende	6	9	3	Living together	Farmer	30-60	None	Farmer	Rural	Modern	Pit/others	Yes	Nurse	CHP	Yes	3	8	Yes	No	Yes	Yes	3	Yes	No	MCHAide	CHP	3	Born alive	Normal	Yes	1hrs	MCHAide	Yes	7	MCHAide	CHP
137	Borbu	3	Kuiva Njagor	Yawei	10	25	23	Yes	Senior Secondary	Islam	Mende	1	1	1	Separated	Student	<30	No	No	Rural	Modern	Pit/others	Yes	Nurse	CHP	Yes	2	8	Yes	Yes	Yes	No	Don’t Know	Yes	No	MCHAide	CHP	2	Born alive	Normal	Yes	2	Nurse	N0	0	0	0
138	Borbu	3	Kuiva Njagor	Yawei	1	26	24	Yes	Junior Secondary	Islam	Mende	3	3	2	Living together	Farmer	>60	Senior Secondary	Trader	Rural	Modern	Pit/others	Yes	Nurse	CHP	Yes	3	6	Yes	No	Yes	Yes	3	Yes	No	MCHAide	CHP	7	Born alive	Normal	No	0	0	0	0	0	0
139	Borbu	3	Kuiva Njagor	Yawei	3	19	19	Yes	primary	Christian	Kono	2	4	2	Living together	Farmer	30-60	None	Tailor	Rural	Modern	Pit/others	Yes	Nurse	CHP	Yes	5	8	Yes	Yes	Yes	Yes	3	Yes	No	MCHAide	CHP	4	Born alive	Normal	Yes	2	MCHAide	Yes	7	TBA	Patient Home
140	Borbu	3	Kuiva Njagor	Yawei	1	20	20	Yes	Primary	Islam	Mende	2	3	1	Married	Farmer	>60	Junior Secondary	Farmer	Rural	Modern	Pit/others	Yes	Nurse	CHP	Yes	4	9	Yes	Yes	Yes	Yes	3	Yes	No	MCHAide	CHP	7	Born alive	Normal	Yes	1	MCHAide	N0	0	0	0
141	Borbu	3	Kuiva Njagor	Yawei	1	19	19	No	None	Islam	Mende	1	2	1	Married	Farmer	30-60	None	Bike rider	Rural	Modern	Pit/others	Yes	Nurse	CHP	Yes	2	7	Yes	Yes	Yes	Yes	3	Yes	No	MCHAide	CHP	1	Born alive	Normal	Yes	1	MCHAide	Yes	2	MCHAide	Patient Home
142	Borbu	3	Kuiva Njagor	Yawei	3	30	28	No	None	Islam	Mende	6	8	1	Married	Farmer	30-60	None	Carpenter	Rural	Modern	Pit/others	Yes	Nurse	CHP	Yes	3	9	No	Yes	Yes	Yes	3	Yes	No	MCHAide	CHP	3	Born alive	Normal	Yes	3	MCHAide	Yes	7	MCHAide	Patient Home
143	Borbu	3	Kuiva Njagor	Yawei	10	30	28	No	None	Islam	Mende	6	9	3	Living together	Farmer	30-60	Primary	Farmer	Rural	Modern	Pit/others	Yes	Nurse	CHP	Yes	3	7	Yes	No	Yes	Yes	Don’t Know	Yes	No	MCHAide	CHP	3	Born alive	Normal	Yes	1hrs	MCHAide	Yes	7	TBA	Patient Home
144	Borbu	3	Kuiva Njagor	Yawei	Always	25	25	No	None	Islam	Mende	5	7	2	Married	Farmer	>60	Junior Secondary	Farmer	Rural	Modern	Pit/others	Yes	Nurse	CHP	Yes	3	7	Yes	Yes	Yes	Yes	3	Yes	No	MCHAide	CHP	3	Born alive	Normal	Yes	3	MCHAide	N0	0	0	0
145	Borbu	3	Kuiva Njagor	Yawei	2	35	33	No	None	Islam	Mende	5	7	2	Living together	Farmer	>60	None	Farmer	Rural	Modern	Pit/others	Yes	Nurse	CHP	Yes	3	8	Yes	No	Yes	Yes	3	Yes	No	MCHAide	CHP	2	Born alive	Normal	Yes	2	MCHAide	N0	0	0	0
146	Kwellu Ngieya	1	Kuiva Mende	Yawei	1	20	20	Yes	Junior Secondary	Christian	Fullah	2	2	1	Living together	Housewife	<30	Senior Secondary	Maison	Rural	Modern	Pit/others	Yes	Nurse	CHP	Yes	6	4	Yes	No	Yes	No	1	Yes	No	MCHAide	CHP	3	Born alive	Normal	Yes	3	TBA	Yes	3	TBA	CHP
147	Kwellu Ngieya	1	Kuiva Mende	Yawei	Always	45	43	No	None	Christian	Kono	5	6	2	Married	Housewife	<30	None	Farmer	Rural	Modern	Pit/others	Yes	TBA	CHP	No	3	4	Yes	Yes	Yes	Yes	2	Yes	No	MCHAide	CHP	3	Born alive	Normal	Yes	3	MCHAide	Yes	2	TBA	Patient Home
148	Kwellu Ngieya	1	Kuiva Mende	Yawei	2	27	27	Yes	Junior Secondary	Christian	Mende	3	3	1	Married	Housewife	<30	None	Mechanic	Rural	Modern	Pit/others	Yes	Nurse	CHP	Yes	3	6	Yes	Yes	Yes	Yes	2	Yes	No	MCHAide	CHP	3	Born alive	Normal	Yes	4	MCHAide	Yes	3	TBA	Other hpme
149	Kwellu Ngieya	1	Kuiva Mende	Yawei	15	35	33	Yes	Primary	Christian	Mende	5	5	2	Married	Farmer	<30	Junior Secondary	Farmer	Rural	Modern	Pit/others	Yes	Nurse	CHP	Yes	2	5	Yes	Yes	Yes	Yes	2	Yes	No	MCHAide	CHP	3	Born alive	Normal	Yes	3	MCHAide	Yes	4	TBA	Other hpme
150	Kwellu Ngieya	1	Kuiva Mende	Yawei	15	28	27	Yes	Junior Secondary	Christian	Kono	1	2	2	Married	Farmer	<30	None	Farmer	Rural	Modern	Pit/others	Yes	TBA	CHP	No	3	4	Yes	Yes	Yes	Yes	3	Yes	No	MCHAide	CHP	2	Born alive	Normal	Yes	3	MCHAide	Yes	3	MCHAide	Patient Home
151	Kwellu Ngieya	1	Kuiva Mende	Yawei	Always	20	20	Yes	Primary	Christian	Kono	3	3	2	Married	Farmer	<30	Junior Secondary	Teacher	Rural	Modern	Pit/others	Yes	Nurse	CHP	Yes	3	9	Yes	Yes	Yes	Yes	2	Yes	No	MCHAide	CHP	3	Born alive	Normal	Yes	2hrs	MCHAide	Yes	5hrs	TBA	Patient Home
152	Kwellu Ngieya	1	Kuiva Mende	Yawei	Always	38	37	No	None	Christian	Kono	5	5	2	Married	Farmer	<30	None	Farmer	Rural	Modern	Pit/others	Yes	TBA	CHP	No	3	8	Yes	Yes	Yes	Yes	3	Yes	No	MCHAide	CHP	3	Born alive	Normal	Yes	3	TBA	Yes	3	TBA	Patient Home
153	Kwellu Ngieya	1	Kuiva Mende	Yawei	Always	23	23	No	None	Christian	Kono	2	4	1	Married	Farmer	<30	None	Bike rider	Rural	Modern	Pit/others	Yes	MCHAide	CHP	Yes	3	9	Yes	Yes	Yes	Yes	2	Yes	No	MCHAide	CHP	3	Born alive	Normal	Yes	2hrs	MCHAide	Yes	7	TBA	Patient Home
154	Kwellu Ngieya	1	Kuiva Mende	Yawei	15	25	24	No	None	Islam	Fullah	2	4	3	Married	Trader	<30	Junior Secondary	Bike rider	Rural	Modern	Pit/others	Yes	Nurse	CHP	Yes	3	5	Yes	Yes	Yes	Yes	2	Yes	No	MCHAide	CHP	3	Born alive	Normal	Yes	3	MCHAide	Yes	3	MCHAide	Patient Home
155	Kwellu Ngieya	1	Kuiva Mende	Yawei	Always	25	25	No	None	Christian	Mende	5	5	2	Married	Farmer	<30	None	Farmer	Rural	Modern	Pit/others	Yes	TBA	CHP	No	3	5	Yes	Yes	Yes	Yes	2	Yes	No	MCHAide	CHP	3	Born alive	Normal	Yes	1hrs	MCHAide	Yes	7	MCHAide	Patient Home
156	Baaka	11	Bendu	Yawei	Always	30	29	No	None	Islam	Mende	5	5	2	Married	Housewife	>60	Senior Secondary	CHW	Rural	Modern	Pit/others	Yes	Nurse	CHC	Yes	2	5	Yes	Yes	Yes	Yes	2	Yes	No	MCHAide	CHP	4	Born alive	Normal	Yes	2hrs	MCHAide	Yes	2	MCHAide	Patient Home
157	Baaka	11	Bendu	Yawei	8	34	33	No	None	Christian	Limba	8	8	2	Married	Farmer	>60	None	Trader	Rural	Modern	Pit/others	Yes	Nurse	CHP	Yes	3	5	Yes	No	Yes	Yes	2	Yes	No	MCHAide	CHP	1	Born alive	Normal	No	0	0	0	0	0	0
158	Baaka	11	Bendu	Yawei	Always	18	17	Yes	Primary	Islam	Mende	2	2	2	Married	Farmer	>60	None	Farmer	Rural	Modern	Pit/others	Yes	Nurse	CHP	Yes	4	6	Yes	Yes	Yes	Yes	2	Yes	No	MCHAide	CHP	3	Born alive	Normal	Yes	2hrs	MCHAide	Yes	3hrs	MCHAide	CHP
159	Baaka	11	Bendu	Yawei	Always	36	36	No	None	Islam	Mende	7	8	1	Married	Farmer	>60	Junior Secondary	CHW	Rural	Modern	Pit/others	Yes	Nurse	CHC	Yes	3	6	Yes	Yes	Yes	Yes	2	Yes	No	MCHAide	CHC	3	Born alive	Normal	Yes	3hrs	MCHAide	Yes	3	TBA	Patient Home
160	Baaka	11	Bendu	Yawei	Always	21	21	Yes	Junior Secondary	Christian	Mende	2	2	1	Living together	Trader	>60	Senior Secondary	Student	Rural	Modern	Pit/others	Yes	Nurse	CHC	Yes	3	8	Yes	No	Yes	Yes	2	Yes	No	MCHAide	CHC	1	Born alive	Normal	Yes	1hrs	MCHAide	Yes	3hrs	TBA	Patient Home
161	Baaka	11	Bendu	Yawei	Always	23	23	Yes	Senior Secondary	Islam	Mende	2	2	2	Married	Housewife	>60	Senior Secondary	Bike rider	Rural	Modern	Pit/others	Yes	Nurse	CHP	Yes	3	6	Yes	Yes	Yes	Yes	2	Yes	No	MCHAide	CHP	1	Born alive	Normal	Yes	2hrs	MCHAide	N0	0	0	0
162	Baaka	11	Bendu	Yawei	Always	25	25	Yes	Junior Secondary	Islam	Mende	4	4	3	Married	Farmer	>60	None	Farmer	Rural	Modern	Pit/others	Yes	Nurse	CHC	Yes	3	8	Yes	Yes	Yes	Yes	2	Yes	No	MCHAide	CHC	1	Born alive	Normal	Yes	1hrs	MCHAide	Yes	3hrs	MCHAide	CHC
163	Baaka	11	Bendu	Yawei	Always	26	25	No	None	Islam	Mende	3	3	1	Married	Farmer	>60	None	Carpenter	Rural	Modern	Pit/others	Yes	Nurse	CHP	Yes	4	5	Yes	Yes	Yes	Yes	2	Yes	No	MCHAide	CHP	1	Born alive	Normal	Yes	1hrs	MCHAide	Yes	3	MCHAide	Patient Home
164	Baaka	11	Bendu	Yawei	Always	17	17	Yes	Junior Secondary	Christian	Mende	1	1	1	Living together	Housewife	>60	None	Trader	Rural	Modern	Pit/others	Yes	Nurse	CHP	Yes	3	8	Yes	Yes	Yes	Yes	2	Yes	No	MCHAide	CHP	3	Born alive	Normal	Yes	2hrs	MCHAide	Yes	3	MCHAide	Patient Home
165	Baaka	11	Bendu	Yawei	Always	36	36	No	None	Islam	Mende	5	5	1	Married	Farmer	>60	None	Farmer	Rural	Modern	Pit/others	Yes	Nurse	CHC	Yes	2	7	Yes	Yes	Yes	Yes	2	Yes	No	MCHAide	CHC	3	Born alive	Normal	No	0	0	0	0	0	0
166	Giehun Town	2	Giehun	Luawa	1	25	25	Yes	Senior Secondary	Islam	Mende	1	1	1	Married	Trader	<30	Junior Secondary	Trader	Urban	Modern	Flush	Yes	MCHAide	CHP	Yes	3	8	Yes	Yes	No	Yes	2	Yes	No	MCHAide	CHP	7hrs	Born alive	Normal	Yes	1hrs	MCHAide	Yes	3	MCHAide	Patient Home
167	Giehun Town	2	Giehun	Luawa	16	18	17	Yes	Junior Secondary	Islam	Mende	1	1	1	Single	Student	<30	No	No	Urban	Natural	Pit/others	Yes	MCHAide	CHP	Yes	5	7	Yes	No	Yes	Yes	2	Yes	No	MCHAide	CHP	2	Born alive	Normal	Yes	2hrs	MCHAide	N0	0	0	0
168	Giehun Town	2	Giehun	Luawa	1	35	35	Yes	Primary	Islam	Mende	7	9	3	Married	Farmer	>60	Junior Secondary	Farmer	Urban	Natural	Pit/others	Yes	MCHAide	CHP	Yes	4	10	Yes	No	Yes	No	2	Yes	No	MCHAide	CHP	1	Born alive	Normal	Yes	1hrs	MCHAide	N0	0	0	0
169	Giehun Town	2	Giehun	Luawa	5	18	17	Yes	Junior Secondary	Islam	Mende	1	1	1	Single	Student	<30	No	No	Urban	Natural	Pit/others	Yes	MCHAide	CHP	Yes	2	8	Yes	Yes	Yes	Yes	3	Yes	No	MCHAide	CHP	3	Born alive	Normal	Yes	4hrs	MCHAide	Yes	3	MCHAide	CHP
170	Giehun Town	2	Giehun	Luawa	5	23	22	Yes	Junior Secondary	Christian	Mende	2	2	1	Living together	Farmer	<30	Senior Secondary	Farmer	Urban	Natural	Pit/others	Yes	MCHAide	CHP	Yes	3	4	Yes	Yes	Yes	Yes	2	Yes	No	MCHAide	CHP	1hrs	Born alive	Normal	Yes	1hrs	MCHAide	Yes	1	CHO	CHP
171	Giehun Town	2	Giehun	Luawa	10	20	19	No	None	Islam	Mende	1	1	1	Married	Farmer	<30	Senior Secondary	Farmer	Urban	Natural	Pit/others	Yes	MCHAide	CHP	Yes	4	4	Yes	Yes	Yes	Yes	1	Yes	No	MCHAide	CHP	1hrs	Born alive	Normal	Yes	10hrs	MCHAide	Yes	2	MCHAide	CHP
172	Giehun Town	2	Giehun	Luawa	2	40	39	No	None	Islam	Mende	4	6	1	Married	Farmer	<30	Junior Secondary	HCW	Urban	Natural	Pit/others	Yes	MCHAide	CHP	Yes	4	4	Yes	Yes	Yes	Yes	1	Yes	Yes	Doctor	Hospital	21	Born alive	CS	Yes	1hrs	Midwife	Yes	3	Midwife	Hospital
173	Giehun Town	2	Giehun	Luawa	7	28	27	Yes	Primary	Islam	Fullah	4	4	1	Married	Trader	<30	Primary	Trader	Urban	Natural	Pit/others	Yes	MCHAide	CHP	Yes	4	3	Yes	Yes	Yes	Yes	1	Yes	No	MCHAide	CHP	1	Born alive	Normal	Yes	1hrs	MCHAide	Yes	1	MCHAide	CHP
174	Giehun Town	2	Giehun	Luawa	4	28	28	Yes	Primary	Christian	Mende	2	2	1	Living together	Trader	<30	Junior Secondary	Trader	Urban	Natural	Pit/others	Yes	MCHAide	CHP	Yes	5	4	Yes	Yes	Yes	Yes	1	Yes	No	MCHAide	CHP	8hrs	Born alive	Normal	Yes	1hrs	MCHAide	Yes	1	MCHAide	CHP
175	Giehun Town	2	Giehun	Luawa	7	29	28	Yes	Junior Secondary	Islam	Mende	2	2	1	Living together	Trader	<30	Senior Secondary	Teacher	Urban	Natural	Pit/others	Yes	MCHAide	CHP	Yes	4	4	Yes	Yes	Yes	Yes	1	Yes	No	MCHAide	CHP	1hrs	Born alive	Normal	Yes	1	MCHAide	Yes	2	MCHAide	CHP
176	Nyanyahun	3	Mofindor	Luawa	Always	20	19	Yes	Junior Secondary	Christian	Mende	1	2	1	Living together	Housewife	>60	Junior Secondary	Farmer	Rural	Natural	Pit/others	Yes	Midwife	Hospital	Yes	5	3	Yes	Yes	Yes	Yes	2	Yes	Yes	Midwife	Hospital	2	Born alive	Normal	Yes	2hrs	Midwife	Yes	3	CHW	Other hpme
177	Nyanyahun	3	Mofindor	Luawa	Always	20	19	Yes	Senior Secondary	Christian	Mende	1	1	1	Living together	Housewife	>60	Junior Secondary	Farmer	Rural	Natural	Pit/others	Yes	Nurse	CHP	Yes	6	5	Yes	No	Yes	Yes	3	Yes	No	TBA	Other Home	1hrs	Born alive	Normal	Yes	1hrs	TBA	Yes	3hrs	TBA	Patient Home
178	Nyanyahun	3	Mofindor	Luawa	1	25	25	No	None	Christian	Mende	4	4	2	Married	Farmer	30-60	Primary	Farmer	Rural	Modern	Pit/others	Yes	Nurse	CHP	Yes	5	4	Yes	Yes	Yes	Yes	2	Yes	Yes	Midwife	Hospital	8hrs	Born alive	Normal	Yes	2hrs	Midwife	Yes	3	MCHAide	Patient Home
179	Nyanyahun	3	Mofindor	Luawa	3	22	21	Yes	Junior Secondary	Islam	Mende	2	3	2	Married	Housewife	>60	Vocational	Teacher	Rural	Modern	Pit/others	Yes	Midwife	Hospital	Yes	4	4	Yes	Yes	Yes	Yes	3	Yes	Yes	Midwife	Hospital	3	Born alive	Normal	Yes	2hrs	Midwife	Yes	3	TBA	Patient Home
180	Nyanyahun	3	Mofindor	Luawa	Always	24	23	Yes	Junior Secondary	Christian	Kissi	3	4	2	Married	Housewife	30-60	Senior Secondary	Farmer	Rural	Modern	Pit/others	Yes	Nurse	CHP	Yes	6	4	Yes	No	Yes	Yes	3	Yes	Yes	Midwife	Hospital	2	Born alive	Normal	Yes	1hrs	Midwife	Yes	3	McHAide	CHP
181	Nyanyahun	3	Mofindor	Luawa	Always	19	19	Yes	Primary	Christian	Mende	1	1	1	Married	Farmer	>60	Junior Secondary	Farmer	Rural	Modern	Pit/others	Yes	Nurse	CHC	Yes	5	3	Yes	Yes	Yes	Yes	2	Yes	Yes	Midwife	Hospital	2	Born alive	Normal	Yes	1hrs	Midwife	Yes	8hrs	Relative	Patient Home
182	Nyanyahun	3	Mofindor	Luawa	Always	20	20	Yes	Junior Secondary	Christian	Mende	1	1	1	Living together	Housewife	>60	Junior Secondary	Bike rider	Rural	Natural	Pit/others	Yes	Nurse	CHC	Yes	5	4	Yes	Yes	Yes	Yes	3	Don’t know	Yes	Midwife	Hospital	3	Born alive	Normal	Yes	1hrs	Midwife	Yes	3	MCHAide	Patient Home
183	Nyanyahun	3	Mofindor	Luawa	Always	20	20	Yes	Primary	Christian	Kissi	2	2	1	Married	Trader	>60	Senior Secondary	HCW	Rural	Modern	Pit/others	Yes	Midwife	CHC	Yes	5	2	Yes	No	Yes	Yes	2	Yes	Yes	Midwife	Hospital	1	Born alive	Normal	Yes	1hrs	Midwife	Yes	8	Relative	Patient Home
184	Nyanyahun	3	Mofindor	Luawa	Always	19	17	Yes	Junior Secondary	Christian	Mende	1	1	1	Living together	Housewife	>60	Senior Secondary	Student	Rural	Natural	Pit/others	Yes	Nurse	CHC	Yes	5	4	Yes	Yes	Yes	Yes	3	Yes	Yes	Midwife	Hospital	2	Born alive	Normal	Yes	1	MCHAide	Yes	4	MCHAide	CHP
185	Nyanyahun	3	Mofindor	Luawa	Always	25	25	Yes	Primary	Christian	Mende	3	3	2	Married	Housewife	>60	Senior Secondary	Student	Rural	Natural	Pit/others	Yes	Midwife	Hospital	Yes	6	1	Yes	Yes	Yes	No	1	Yes	No	TBA	Her Home	3hrs	Born alive	Normal	Yes	1hrs	TBA	Yes	4	TBA	Patient Home
186	Tongoyama	46	Luawa Fogiuya	Luawa	1	22	22	Yes	Primary	Christian	Mende	4	4	3	Married	Farmer	<30	None	Farmer	Urban	Natural	Pit/others	Yes	Midwife	Hospital	Yes	5	4	Yes	No	Yes	Yes	2	Yes	Yes	Midwife	Hospital	2	Born alive	Normal	Yes	1hrs	Midwife	N0	0	0	0
187	Tongoyama	46	Luawa Fogiuya	Luawa	19	39	39	Yes	Primary	Islam	Mende	4	8	1	Married	Farmer	<30	Junior Secondary	Tailor	Urban	Natural	Pit/others	Yes	Midwife	Hospital	Yes	5	3	Yes	Yes	Yes	Yes	2	Yes	Yes	Midwife	Hospital	1	Born alive	Normal	Yes	1hrs	Midwife	N0	0	0	0
188	Gitiby	46	Luawa Fogiuya	Luawa	2	20	18	Yes	Senior Secondary	Christian	Mende	1	1	1	Married	Housewife	<30	Senior Secondary	Jobless	Urban	Modern	Pit/others	Yes	Midwife	Hospital	Yes	3	5	Yes	Yes	Yes	Yes	2	Yes	Yes	Midwife	Hospital	1	Born alive	Normal	Yes	2hrs	Midwife	N0	0	0	0
189	Tongoyama	46	Luawa Fogiuya	Luawa	1	18	17	No	None	Christian	Mende	1	1	1	Married	Farmer	<30	Junior Secondary	Farmer	Urban	Modern	Pit/others	Yes	Midwife	Hospital	Yes	4	4	Yes	Yes	Yes	Yes	2	Yes	Yes	Midwife	Hospital	3	Born alive	Assisted	Yes	1hrs	Midwife	N0	0	0	0
190	Gbanyawallu	46	Luawa Fogiuya	Luawa	9	20	20	Yes	Junior Secondary	Islam	Mende	1	2	1	Single	Jobless	<30	No	No	Urban	Modern	Pit/others	Yes	Nurse	CHP	Yes	4	5	Yes	Yes	Yes	Yes	2	Yes	Yes	Midwife	Hospital	2	Born alive	Normal	Yes	1hrs	Midwife	N0	0	0	0
191	Tongoyama	46	Luawa Fogiuya	Luawa	16	25	23	Yes	Vocational	Islam	Madingo	1	1	1	Single	Nurse	<30	No	No	Urban	Modern	Pit/others	Yes	CHO	CHC	Yes	4	6	Yes	Yes	Yes	Yes	3	Yes	Yes	Midwife	Hospital	1	Born alive	Normal	Yes	1hrs	Midwife	Yes	1	Nurse	Patient Home
192	Tongoyama	46	Luawa Fogiuya	Luawa	Always	20	20	Yes	Senior Secondary	Islam	Madingo	1	1	1	Living together	Student	<30	Senior Secondary	Jobless	Urban	Modern	Pit/others	Yes	Midwife	Hospital	Yes	5	5	No	No	No	No	2	Yes	Yes	Midwife	Hospital	1	Born alive	Normal	Yes	1hrs	Midwife	N0	0	0	0
193	Massanta	63	Luawa Fogiuya	Luawa	2	25	25	Yes	Primary	Christian	Mende	4	4	2	Married	Housewife	<30	Vocational	Teacher	Urban	Modern	Pit/others	Yes	Midwife	Hospital	Yes	6	2	Yes	Yes	Yes	Yes	2	Yes	Yes	Midwife	Hospital	4	Born alive	Normal	Yes	1hrs	Midwife	N0	0	0	0
194	Massanta	63	Luawa Fogiuya	Luawa	1	20	20	Yes	Senior Secondary	Christian	Kissi	1	1	1	Living together	Student	<30	Vocational	Trader	Urban	Natural	Pit/others	Yes	Midwife	Hospital	Yes	5	5	Yes	Yes	Yes	Yes	2	Yes	Yes	Midwife	Hospital	2	Born alive	Normal	Yes	2hrs	Midwife	N0	0	0	0
195	Massanta	63	Luawa Fogiuya	Luawa	5	28	28	Yes	Primary	Christian	Kissi	4	4	2	Married	Housewife	<30	Junior Secondary	Farmer	Urban	Modern	Pit/others	Yes	Midwife	Hospital	Yes	3	6	Yes	Yes	Yes	Yes	2	Yes	Yes	Midwife	Hospital	1	Born alive	Assisted	Yes	1hrs	Midwife	N0	0	0	0
196	Massanta	63	Luawa Fogiuya	Luawa	10	27	26	No	None	Christian	Kissi	3	3	1	Married	Trader	30-60	Vocational	Carpenter	Urban	Modern	Pit/others	Yes	Midwife	Hospital	Yes	4	5	Yes	No	Yes	Yes	2	Yes	Yes	Doctor	Hospital	5	Born alive	CS	Yes	1hrs	Doctor	Yes	3	Midwife	Hospital
197	Massanta	63	Luawa Fogiuya	Luawa	2	21	21	Yes	Junior Secondary	Islam	Mende	3	3	2	Married	Housewife	30-60	None	Carpenter	Urban	Natural	Pit/others	Yes	CHO	Hospital	Yes	5	5	Yes	Yes	Yes	No	2	Yes	Yes	Midwife	Hospital	3	Born alive	Normal	Yes	2hrs	Midwife	N0	0	0	0
198	Massanta	63	Luawa Fogiuya	Luawa	1	18	18	No	None	Islam	Fullah	1	2	2	Married	Housewife	30-60	Senior Secondary	Teacher	Urban	Modern	Pit/others	Yes	CHO	Hospital	Yes	4	7	Yes	No	Yes	Yes	3	Yes	Yes	Midwife	Hospital	1	Born alive	Normal	Yes	1hrs	Midwife	N0	0	0	0
199	Massanta	63	Luawa Fogiuya	Luawa	5	23	23	Yes	Primary	Islam	Fullah	3	3	2	Married	Housewife	30-60	None	Trader	Urban	Modern	Pit/others	Yes	CHO	Hospital	Yes	1	4	Yes	No	Yes	Yes	3	Yes	Yes	Midwife	Hospital	1	Born alive	Normal	Yes	1hrs	Midwife	N0	0	0	0
200	Massanta	63	Luawa Fogiuya	Luawa	20	23	23	No	None	Islam	Fullah	4	4	2	Married	Housewife	30-60	None	Trader	Urban	Modern	Pit/others	Yes	CHO	Hospital	Yes	4	4	Yes	No	Yes	Yes	3	Yes	Yes	Midwife	Hospital	1	Born alive	Normal	Yes	1hrs	Midwife	N0	0	0	0
201	Massanta	63	Luawa Fogiuya	Luawa	1	32	32	Yes	Senior Secondary	Islam	kissi	3	4	2	Married	Housewife	30-60	Junior Secondary	Security	Urban	Modern	Pit/others	Yes	CHO	Hospital	Yes	5	2	Yes	No	Yes	Yes	2	Yes	Yes	Doctor	Hospital	7	Born alive	CS	Yes	1hrs	Midwife	Yes	3	Midwife	Hospital
202	Massanta	63	Luawa Fogiuya	Luawa	2	27	27	No	None	Islam	Fullah	4	4	2	Married	Housewife	30-60	Primary	Bike rider	Urban	Modern	Pit/others	Yes	Midwife	Hospital	Yes	4	2	Yes	No	Yes	Yes	2	Yes	Yes	Midwife	Hospital	1	Born alive	Normal	Yes	1hrs	Midwife	N0	0	0	0
203	Dodowo Junction	31	Luawa Fogiuya	Luawa	3	21	21	Yes	Junior Secondary	Christian	Mende	3	3	2	Living together	Trader	<30	Senior Secondary	Farmer	Urban	Natural	Pit/others	Yes	Nurse	Hospital	Yes	3	4	Yes	Yes	Yes	Yes	2	Yes	Yes	Midwife	Hospital	1	Born alive	Normal	Yes	1hrs	Nurse	N0	0	0	0
204	Dodowo Junction	31	Luawa Fogiuya	Luawa	1	25	24	Yes	Junior Secondary	Islam	Mende	2	3	3	Married	Trader	<30	Junior Secondary	Bike rider	Urban	Natural	Pit/others	Yes	Nurse	Hospital	Yes	5	2	Yes	No	Yes	No	2	Yes	Yes	Midwife	Hospital	1	Born alive	Normal	Yes	1hrs	Midwife	N0	0	0	0
205	Dodowo Junction	31	Luawa Fogiuya	Luawa	1	30	29	No	None	Islam	Mende	1	3	3	Widow	Farmer	<30	None	Farmer	Urban	Natural	Pit/others	Yes	Nurse	Hospital	Yes	3	5	Yes	Yes	Yes	Yes	2	Yes	Yes	Midwife	Hospital	1	Born alive	Normal	Yes	1hrs	Midwife	Yes	1	Midwife	Hospital
206	Dodowo Junction	31	Luawa Fogiuya	Luawa	1	27	27	Yes	Primary	Islam	Mende	6	6	2	Living together	Trader	<30	Higher	Teacher	Urban	Natural	Pit/others	Yes	Nurse	Hospital	Yes	4	3	Yes	Yes	Yes	Yes	2	Yes	Yes	Doctor	Hospital	7	Born alive	Assisted	Yes	1hrs	Midwife	Yes	3	Midwife	Hospital
207	Dodowo Junction	31	Luawa Fogiuya	Luawa	20	26	26	Yes	Junior Secondary	Islam	Mende	2	2	2	Married	Trader	<30	Senior Secondary	Tailor	Urban	Natural	Pit/others	Yes	Nurse	Hospital	Yes	6	4	Yes	Yes	Yes	Yes	Don’t Know	Yes	Yes	Midwife	Hospital	2	Born alive	Normal	Yes	1hrs	Nurse	Yes	1	Nurse	Hospital
208	Dodowo Junction	31	Luawa Fogiuya	Luawa	3	22	21	Yes	Senior Secondary	Islam	Kissi	2	2	1	Married	Student	<30	Senior Secondary	Jobless	Urban	Natural	Pit/others	Yes	Midwife	Hospital	Yes	3	5	Yes	No	Yes	No	2	Yes	Yes	Midwife	Hospital	2	Born alive	Normal	Yes	1hrs	Doctor	N0	0	0	0
209	Dodowo Junction	31	Luawa Fogiuya	Luawa	1	17	17	Yes	Junior Secondary	Islam	Mende	1	1	1	Living together	Student	>60	Senior Secondary	Student	Urban	Natural	Pit/others	Yes	Midwife	Hospital	Yes	4	4	Yes	No	Yes	Yes	2	Yes	Yes	Midwife	Hospital	1	Born alive	Normal	Yes	1hrs	Doctor	Yes	2	Midwife	Hospital
210	Dodowo Junction	31	Luawa Fogiuya	Luawa	13	23	22	Yes	Senior Secondary	Christian	Mende	2	2	1	Living together	Teacher	<30	Junior Secondary	Driver	Urban	Natural	Pit/others	Yes	Midwife	CHC	Yes	6	3	Yes	Yes	Yes	Yes	2	Yes	Yes	Midwife	Hospital	1	Born alive	Normal	Yes	1hrs	Midwife	Yes	1	Nurse	Patient Home
211	Dodowo Junction	31	Luawa Fogiuya	Luawa	3	26	25	Yes	Senior Secondary	Islam	Kissi	1	2	1	Living together	Housewife	<30	Vocational	Teacher	Urban	Natural	Pit/others	Yes	CHO	Hospital	Yes	6	3	Yes	Yes	Yes	Yes	2	No	Yes	Doctor	Hospital	5	Born alive	CS	Yes	1hrs	Doctor	Yes	2	Doctor	Hospital
212	Dodowo Junction	31	Luawa Fogiuya	Luawa	1	22	21	Yes	Junior Secondary	Islam	Mende	1	1	1	Living together	Student	30-60	Vocational	Teacher	Urban	Natural	Pit/others	Yes	MCHAide	CHC	Yes	3	8	Yes	Yes	Yes	No	3	Yes	No	MCHAide	MCHP	7	Born alive	Normal	Yes	1hrs	MCHAide	Yes	3	MCHAide	Patient Home
213	Baoma	1	Gbela	Luawa	5	35	34	Yes	Junior Secondary	Islam	Mende	4	5	2	Married	Farmer	<30	None	Farmer	Rural	Natural	Pit/others	Yes	MCHAide	CHP	Yes	4	5	Yes	No	Yes	No	2	Yes	No	MCHAide	CHP	1	Born alive	Normal	Yes	1hrs	MCHAide	N0	0	0	0
214	Baoma	1	Gbela	Luawa	2	30	29	Yes	Primary	Islam	Mende	4	5	2	Married	Farmer	<30	Primary	Farmer	Rural	Natural	Pit/others	Yes	McHAide	CHP	Yes	3	4	Yes	Yes	Yes	Yes	1	Yes	No	MCHAide	CHP	7	Born alive	Normal	Yes	1hrs	MCHAide	Yes	4	MCHAide	CHP
215	Baoma	1	Gbela	Luawa	1	20	19	Yes	Primary	Islam	Mende	2	2	2	Married	Farmer	<30	None	Farmer	Rural	Natural	Pit/others	Yes	MCHAide	CHP	Yes	2	4	Yes	Yes	Yes	No	4	Yes	No	MCHAide	CHP	3	Born alive	Normal	Yes	2hrs	MCHAide	N0	0	0	0
216	Baoma	1	Gbela	Luawa	2	21	20	No	None	Islam	Mende	1	1	1	Living together	Housewife	30-60	None	Tailor	Rural	Natural	Pit/others	Yes	MCHAide	CHP	Yes	3	3	Yes	Yes	Yes	Yes	1	Yes	No	MCHAide	CHP	10hrs	Born alive	Normal	Yes	1hrs	MCHAide	Yes	2	MCHAide	CHP
217	Baoma	1	Gbela	Luawa	4	25	25	No	None	Christian	Kissi	3	5	2	Living together	Farmer	<30	None	Farmer	Rural	Natural	Pit/others	Yes	MCHAide	CHP	Yes	4	5	Yes	Yes	Yes	Yes	2	Yes	No	MCHAide	CHP	3	Born alive	Normal	Yes	1hrs	MCHAide	Yes	3	MCHAide	CHP
218	Baoma	1	Gbela	Luawa	2	19	19	Yes	Primary	Christian	Mende	2	2	2	Living together	Farmer	30-60	Primary	Maison	Rural	Natural	Pit/others	Yes	Nurse	CHP	Yes	4	2	Yes	Yes	Yes	Yes	1	Yes	Yes	Doctor	Hospital	6	Born alive	CS	Yes	2hrs	Midwife	Yes	3	Nurse	CHP
219	Baoma	1	Gbela	Luawa	15	30	29	No	None	Islam	Mende	5	5	1	Married	Farmer	<30	None	Farmer	Rural	Natural	Pit/others	Yes	MCHAide	CHP	Yes	3	4	Yes	Yes	Yes	Yes	3	Yes	No	MCHAide	CHP	12hrs	Born alive	Normal	Yes	1hrs	MCHAide	N0	0	0	0
220	Baoma	1	Gbela	Luawa	10	30	30	No	None	Christian	Mende	5	6	2	Married	Farmer	<30	None	Farmer	Rural	Natural	Pit/others	Yes	MCHAide	CHP	Yes	3	3	Yes	Yes	Yes	Yes	3	Yes	No	MChAide	CHP	1	Born alive	Normal	Yes	1hrs	MCHAide	Yes	3	TBA	Patient Home
221	Baoma	1	Gbela	Luawa	2	20	19	Yes	Junior Secondary	Christian	Mende	2	2	1	Living together	Farmer	<30	None	Farmer	Rural	Natural	Pit/others	Yes	MCHAide	CHP	Yes	4	5	Yes	Yes	Yes	Yes	3	Yes	No	MCHAide	CHP	1	Born alive	Normal	Yes	1hrs	MCHAide	Yes	2	TBA	Patient Home
222	Baoma	1	Gbela	Luawa	10	42	41	No	None	Islam	Mende	5	8	3	Married	Farmer	<30	None	Blacksmith	Rural	Natural	Pit/others	Yes	MCHAide	CHP	Yes	3	6	Yes	Yes	Yes	Yes	3	Yes	No	MChAide	CHP	1	Died few days	Normal	Yes	1hrs	MCHAide	N0	0	0	0
223	Pewama	3	Sienga	Dea	Always	18	16	No	None	Islam	Mende	1	1	1	Married	Farmer	30-60	None	Farmer	Rural	Natural	Pit/others	Yes	Nurse	CHP	Yes	Don’t know	4	Yes	No	Yes	No	3	Yes	Yes	Doctor	Hospital	7	Born alive	Assisted	Yes	2hrs	Midwife	Yes	14	MCHAide	CHP
224	Pewama	3	Sienga	Dea	Always	20	18	Yes	Primary	Islam	Mende	1	1	1	Married	Farmer	30-60	Primary	Jobless	Rural	Natural	Pit/others	Yes	Nurse	CHP	Yes	Don’t know	4	Yes	No	Yes	No	3	Yes	No	MCHAide	CHP	4	Born alive	Normal	Yes	2hrs	MCHAide	Yes	3	CHw	Patient Home
225	Baoma	3	Sienga	Dea	Always	19	18	Yes	Primary	Islam	Mende	1	1	1	Married	Farmer	>60	None	Farmer	Rural	Natural	Pit/others	Yes	Nurse	CHP	Yes	Don’t know	6	Yes	No	Yes	No	3	Yes	Yes	Doctor	Hospital	14	Born alive	CS	Yes	1hrs	Midwife	Yes	3	CHW	Patient Home
226	Baoma	3	Sienga	Dea	Always	26	25	No	None	Islam	Mende	3	3	2	Married	Farmer	>60	None	Farmer	Rural	Natural	Pit/others	Yes	Nurse	CHP	Yes	4	4	Yes	No	Yes	No	3	Yes	No	MCHAide	CHP	2	Born alive	Normal	Yes	2hrs	MCHAide	Yes	3	CHW	Patient Home
227	Baoma	3	Sienga	Dea	Always	30	29	No	None	Islam	Mende	4	4	2	Married	Farmer	>60	Senior Secondary	Farmer	Rural	Natural	Pit/others	Yes	Nurse	CHP	Yes	4	6	Yes	No	Yes	No	3	Yes	No	MCHAide	CHP	4	Born alive	Normal	Yes	1hrs	MCHAide	Yes	2	CHW	Patient Home
228	Pewama	3	Sienga	Dea	Always	26	24	No	None	Islam	Mende	3	3	2	Married	Farmer	30-60	None	Farmer	Rural	Natural	Pit/others	Yes	Nurse	CHP	Yes	Don’t know	6	Yes	No	Yes	No	3	Yes	No	TBA	CHP	3	Born alive	Normal	Yes	1hrs	MCHAide	Yes	2	CHW	Patient Home
229	Pewama	3	Sienga	Dea	Always	30	28	Yes	Primary	Islam	Mende	4	4	2	Married	Farmer	30-60	None	Farmer	Rural	Natural	Pit/others	Yes	Nurse	CHP	Yes	3	5	Yes	No	Yes	No	3	Yes	No	MCHAide	CHP	4	Born alive	Normal	Yes	2hrs	MCHAide	Yes	3	CHW	Patient Home
230	Pewama	3	Sienga	Dea	Always	36	34	No	None	Islam	Mende	8	8	2	Married	Farmer	30-60	None	Farmer	Rural	Natural	Pit/others	Yes	Nurse	CHP	Yes	3	5	Yes	No	Yes	No	3	Yes	No	MCHAide	CHP	3	Born alive	Normal	Yes	1hrs	MCHAide	Yes	2	CHW	Patient Home
231	Baoma	3	Sienga	Dea	Always	28	27	Yes	Senior Secondary	Islam	Mende	2	2	1	Married	Farmer	>60	None	Farmer	Rural	Natural	Pit/others	Yes	Nurse	CHP	Yes	Don’t know	6	Yes	No	Yes	No	3	Yes	No	MCHAide	CHP	3	Born alive	Normal	Yes	1hrs	MCHAide	Yes	3	CHW	Patient Home
232	Baoma	3	Sienga	Dea	Always	33	32	No	None	Islam	Mende	7	7	2	Married	Farmer	>60	None	Farmer	Rural	Natural	Pit/others	Yes	Nurse	CHP	Yes	4	4	Yes	No	Yes	No	3	Yes	No	MCHAide	CHP	3	Born alive	Normal	Yes	2hrs	MCHAide	Yes	3	CHW	Patient Home
233	Niahun Gbuyama	2	Sei 2	Njaluahun	7	23	22	Yes	Junior Secondary	Christian	Mende	4	4	3	Married	Farmer	<30	Senior Secondary	Security	Rural	Natural	Pit/others	Yes	MCHAide	CHP	Yes	3	6	Yes	Yes	Yes	Yes	3	Yes	No	MCHAide	CHP	4	Born alive	Normal	Yes	1hrs	MCHAide	Yes	1	Nurse	Patient Home
234	NIahun Gbuyama	2	Sei 2	Njaluahun	18	34	32	No	Mone	Christian	Mende	4	4	1	Married	Housewife	<30	None	Farmer	Rural	Modern	Pit/others	Yes	MCHAide	CHP	Yes	3	4	Yes	Yes	Yes	Yes	3	Yes	No	MCHAide	CHP	3	Born alive	Normal	Yes	1hrs	MCHAide	Yes	2	MCHAide	Patient Home
235	NIahun Gbuyama	2	Sei 2	Njaluahun	20	32	30	No	None	Christian	Mende	3	3	2	Married	Farmer	<30	None	Miner	Rural	Natural	Pit/others	Yes	MCHAide	CHP	Yes	3	6	Yes	Yes	Yes	Yes	4	Yes	No	MCHAide	CHP	3	Born alive	Normal	Yes	1hrs	MCHAide	Yes	2	MCHAide	Patient Home
236	Segbwema Town	23	Sei 1	Njaluahun	19	28	26	No	Junior Secondary	Islam	Mende	3	3	3	Separated	Trader	30-60	No	No	Urban	Natural	Pit/others	Yes	Nurse	CHC	Yes	4	3	Yes	Yes	Yes	Yes	3	Yes	Yes	Midwife	CHC	5	Born alive	Normal	Yes	1hrs	Midwife	N0	0	0	0
237	Segbwema Town	23	Sei 1	Njaluahun	6	18	17	Yes	Primary	Islam	Mende	1	1	1	Married	Tailor	30-60	None	Farmer	Urban	Natural	Pit/others	Yes	Nurse	CHC	Yes	3	7	Yes	Yes	Yes	Yes	4	Yes	No	MCHAide	Private	14	Born alive	Normal	Yes	1hrs	MCHAide	N0	0	0	0
238	Segbwema Town	23	Sei 1	Njaluahun	3	19	17	Yes	Senior Secondary	Christian	Mende	1	1	1	Living together	Student	30-60	Higher	Teacher	Urban	Modern	Pit/others	Yes	Nurse	CHC	Yes	3	5	Yes	Yes	Yes	Yes	3	yes	Yes	Midwife	CHC	4	Born alive	Normal	Yes	1hrs	Midwife	Yes	3hrs	Midwife	Patient Home
239	Segbwema Town	23	sei 1	Njaluahun	11	26	25	No	None	Islam	Mende	3	3	1	Married	Trader	>60	Junior Secondary	Trader	Urban	Modern	Pit/others	Yes	Nurse	Private	Yes	5	5	Yes	Yes	Yes	Yes	3	Yes	Yes	Midwife	Private	14	Born alive	CS	Yes	1hrs	Doctor	N0	0	0	0
240	Segbwema Town	23	Sei 1	Njaluahun	Always	25	24	Yes	Vocational	Christian	Mende	1	1	1	Living together	Housewife	30-60	Higher	Doctor	Urban	Modern	Flush	Yes	Doctor	Hospital	Yes	3	10	Yes	Yes	Yes	Yes	3	Yes	Yes	Doctor	Hospital	4	Born alive	Normal	Yes	1hrs	Midwife	Yes	0	0	0
241	Segbwema Town	23	Sei 1	Njaluahun	Always	28	27	No	None	Islam	Mende	3	4	2	Married	Farmer	30-60	Junior Secondary	Farmer	Urban	Natural	Pit/others	Yes	Nurse	Hospital	Yes	6	5	Yes	Yes	Yes	Yes	3	Yes	Yes	Midwife	Hospital	4	Born alive	Normal	Yes	1hrs	Midwife	Yes	14	Midwife	Hospital
242	Segbwema Town	23	Sei 1	Njaluahun	1	25	24	Yes	Junior Secondary	Islam	Temne	1	4	4	Married	Trader	<30	Senior Secondary	Trader	Urban	Modern	Pit/others	Yes	Nurse	CHC	Yes	3	5	Yes	Yes	Yes	Yes	5	Yes	No	MCHAide	CHC	3	Born alive	Normal	Yes	1hrs	Nurse	Yes	7	Nurse	CHP
243	Segbwema Town	23	Sei 1	Njaluahun	5	20	19	Yes	Senior Secondary	Islam	Mende	1	1	1	Separated	Student	30-60	Senior Secondary	Trader	Urban	Modern	Pit/others	Yes	Nurse	CHC	Yes	3	5	Yes	Yes	Yes	Yes	3	Yes	No	MCHAide	CHC	3	Born alive	Normal	Yes	1hrs	Nurse	Yes	7	Nurse	Patient Home
244	Segbwema Town	23	Sei 1	Njaluahun	25	35	34	Yes	Primary	Christian	Mende	6	6	2	Married	Farmer	>60	None	Farmer	Urban	Modern	Pit/others	Yes	Nurse	CHC	Yes	2	6	Yes	Yes	Yes	Yes	4	Yes	Yes	Midwife	CHC	7	Born alive	Normal	Yes	1hrs	Midwife	N0	0	0	0
245	Segbwema Town	23	Sei 1	Njaluahun	Always	20	18	No	None	Islam	mende	2	2	2	Married	Housewife	30-60	Senior Secondary	Trader	Urban	Natural	Pit/others	Yes	Nurse	Private	Yes	4	5	Yes	Yes	Yes	Yes	3	Yes	Yes	Midwife	Private	3	Born alive	Normal	Yes	1hrs	Midwife	N0	0	0	0
246	Ngiema	3	Lower kpombali	Luawa	Always	16	16	Yes	Primary	Islam	Mende	1	1	1	Married	Farmer	<30	Primary	Farmer	Rural	Natural	Pit/others	Yes	Nurse	CHP	Yes	4	7	Yes	Yes	Yes	Yes	2	Yes	No	MCHAide	CHP	3	Born alive	Normal	Yes	1hrs	MCHAide	Yes	3hrs	MCHAide	Patient Home
247	Ngiema	3	Lower kpombali	Luawa	Always	20	18	Yes	Primary	Islam	Mende	1	1	1	Married	Farmer	<30	None	Farmer	Rural	Natural	Pit/others	Yes	Nurse	CHP	Yes	3	7	Yes	Yes	Yes	Yes	3	Yes	Yes	Midwife	Hospital	7	Born alive	Assisted	Yes	1	Midwife	Yes	3	MCHAide	Patient Home
248	Ngiema	3	Lower kpombali	Luawa	Always	18	18	Yes	Primary	Islam	Mende	1	1	1	Married	Farmer	<30	Primary	Farmer	Rural	Natural	Pit/others	Yes	Nurse	CHP	Yes	3	7	Yes	Yes	Yes	Yes	3	Yes	Yes	MCHAide	CHP	3	Born alive	Normal	Yes	1hrs	MCHAide	Yes	3	MCHAide	Patient Home
249	Ngiema	3	Lower kpombali	Luawa	Always	15	15	No	None	Islam	Mende	1	1	1	Married	Farmer	<30	None	Farmer	Rural	Natural	Pit/others	Yes	Nurse	CHP	Yes	4	3	Yes	Yes	Yes	Yes	3	Yes	No	MCHAide	CHP	3	Born alive	Normal	Yes	1hrs	MCHAide	Yes	3	MCHAide	Patient Home
250	Ngevolu	15	Luawa Fogiuya	Luawa	2	21	21	Yes	Junior Secondary	Islam	Mende	2	2	1	Married	Farmer	>60	None	Farmer	Rural	Natural	Pit/others	Yes	Nurse	CHP	Yes	1	5	Yes	No	Yes	Yes	3	Yes	No	MCHAide	CHP	1	Born alive	Normal	Yes	1hrs	MCHAide	N0	0	0	0
251	Ngevolu	15	Luawa Fogiuya	Luawa	Always	23	23	No	None	Islam	Mende	5	5	1	Married	Farmer	>60	Senior Secondary	Teacher	Rural	Natural	Pit/others	Yes	Nurse	CHP	Yes	4	6	Yes	Yes	Yes	Yes	3	Yes	No	MCHAide	CHP	3	Born alive	Normal	Yes	1hrs	MCHAide	Yes	3	TBA	Patient Home
252	Ngevolu	15	Luawa Fogiuya	Luawa	Always	20	20	Yes	Primary	Islam	Mende	1	1	1	Married	Farmer	>60	Senior Secondary	Farmer	Rural	Natural	Pit/others	Yes	Nurse	CHP	Yes	4	6	Yes	Yes	Yes	Yes	3	Yes	No	MCHAide	CHP	3	Born alive	Normal	Yes	1hrs	MCHAide	Yes	3	TBA	Patient Home
253	Namiema	15	Luawa Fogiuya	Luawa	4	22	22	No	None	Christian	Kissi	2	2	1	Married	Farmer	>60	Junior Secondary	Farmer	Rural	Natural	Pit/others	Yes	Nurse	CHP	Yes	3	4	Yes	Yes	Yes	Yes	3	Yes	No	MCHAide	CHP	1	Born alive	Normal	Yes	1hrs	MCHAide	Yes	3	TBA	Patient Home
254	Namiema	15	Luawa Fogiuya	Luawa	Always	35	35	No	None	Christian	Mende	5	5	2	Married	Farmer	>60	None	Farmer	Rural	Natural	Pit/others	Yes	Nurse	CHP	Yes	6	4	Yes	Yes	Yes	Yes	3	Yes	Yes	Midwife	Hospital	2	Born alive	Normal	Yes	1hrs	Midwife	Yes	3	TBA	Patient Home
255	Namiema	15	Luawa Fogiuya	Luawa	7	25	25	No	None	Islam	Mende	2	2	2	Married	Farmer	>60	Senior Secondary	Farmer	Rural	Natural	Pit/others	Yes	Nurse	CHP	Yes	2	5	Yes	Yes	Yes	Yes	3	Yes	No	MCHAide	CHP	2	Born alive	Normal	Yes	1hrs	MCHAide	Yes	4	TBA	Patient Home
256	Namiema	15	Luawa Fogiuya	Luawa	Always	20	20	Yes	Senior Secondary	Islam	Mende	2	2	2	Living together	Student	>60	Senior Secondary	Student	Rural	Natural	Pit/others	Yes	Nurse	CHP	Yes	6	4	Yes	Yes	Yes	Yes	3	Yes	No	MCHAide	CHP	1	Born alive	Normal	Yes	1hrs	MChAide	Yes	3	TBA	Patient Home
257	Jujuma	15	Luawa Fogiuya	Luawa	Always	19	19	Yes	Senior Secondary	islam	Mende	2	2	2	Living together	Student	>60	Senior Secondary	Trader	Rural	Natural	Pit/others	Yes	Nurse	CHP	Yes	3	6	Yes	Yes	Yes	Yes	2	Yes	No	MCHAide	CHP	2	Born alive	Normal	Yes	1hrs	MCHAide	Yes	4	TBA	Patient Home
258	Jujuma	15	Luawa Fogiuya	Luawa	Always	22	21	Yes	Primary	Christian	Mende	3	3	2	Married	Farmer	>60	Junior Secondary	Farmer	Rural	Natural	Pit/others	Yes	Nurse	CHP	Yes	3	7	Yes	Yes	Yes	Yes	2	Yes	No	MCHAide	CHP	3	Born alive	Normal	Yes	1hrs	MCHAide	Yes	3	TBA	Patient Home
259	Jujuma	15	Luawa Fogiuya	Luawa	1	18	16	Yes	Junior Secondary	Christian	Mende	1	1	1	Living together	Student	>60	Junior Secondary	Trader	Rural	Natural	Pit/others	Yes	Nurse	CHP	Yes	3	5	Yes	Yes	Yes	Yes	3	Yes	Yes	Midwife	Hospital	2	Born alive	Normal	Yes	1hrs	Midwife	Yes	3hrs	TBA	Patient Home
260	Ngiema	3	Luawa kpombali	Luawa	5	23	21	Yes	Junior Secondary	Islam	Mende	2	2	2	Married	Trader	<30	Vocational	Teacher	Rural	Natural	Pit/others	Yes	Nurse	CHP	Yes	3	7	Yes	Yes	Yes	Yes	4	Yes	No	MCHAide	CHP	3	Born alive	Normal	Yes	1hrs	MCHAide	Yes	4	MCHAide	Patient Home
261	Ngiema	3	Lower kpombali	Luawa	4	20	18	Yes	Junior Secondary	Christian	Mende	1	1	1	Living together	Trader	<30	Primary	Farmer	Rural	Natural	Pit/others	Yes	Nurse	CHP	Yes	3	8	Yes	Yes	Yes	Yes	4	Yes	No	MCHAide	CHP	3	Born alive	Normal	Yes	1hrs	MCHAide	Yes	3	MCHAide	Patient Home
262	Ngiema	3	Lower kpombali	Luawa	Always	30	28	Yes	Primary	Islam	Mende	3	3	1	Married	Farmer	<30	None	Farmer	Rural	Natural	Pit/others	Yes	Nurse	Hospital	Yes	3	5	Yes	Yes	Yes	Yes	2	Yes	No	MCHAide	CHP	2	Born alive	Normal	Yes	1hrs	MCHAide	Yes	4	MCHAide	Patient Home
263	Ngiema	3	Lower kpombali	Luawa	Always	25	23	No	None	Islam	Mende	5	5	2	Married	Farmer	<30	None	Farmer	Rural	Natural	Pit/others	Yes	Nurse	CHP	Yes	4	6	Yes	Yes	Yes	Yes	2	Yes	No	MCHAide	CHP	2	Born alive	Normal	Yes	1hrs	MCHAide	Yes	3	MCHAide	Patient Home
264	Ngiema	3	Lower kpombali	Luawa	1	21	19	Yes	Junior Secondary	Islam	Mende	1	1	1	Living together	Student	<30	Senior Secondary	Student	Rural	Natural	Pit/others	Yes	Nurse	CHP	Yes	4	7	Yes	Yes	Yes	Yes	2	Yes	No	MCHAide	CHP	3	Born alive	Normal	Yes	1hrs	MCHAide	Yes	5	MCHAide	Patient Home
265	Ngiema	3	Lower kpombali	Luawa	Always	19	19	Yes	Junior Secondary	Islam	Mende	1	1	1	Married	Farmer	<30	Junior Secondary	Farmer	Rural	Natural	Pit/others	Yes	Nurse	CHP	Yes	2	5	Yes	Yes	Yes	Yes	3	Yes	No	MCHAide	CHP	3	Born alive	Normal	Yes	1hrs	MCHAide	Yes	3	MCHAide	Patient Home
266	Foidu	1	Kama Dakaleley	Kissi Kama	1	19	18	Yes	Junior Secondary	Christian	Kisi	1	1	1	Married	Farmer	<30	Primary	Farmer	Rural	Natural	Pit/others	Yes	Nurse	CHP	Yes	2	8	Yes	No	Yes	No	2	Yes	No	MCHAide	CHP	3	Born alive	Normal	Yes	3	MCHAide	Yes	3	MCHAide	Patient Home
267	Foidu	1	Kama Dakaleley	Kissi Kama	15	36	35	Yes	Junior Secondary	Christian	Kissi	6	8	2	Married	Farmer	<30	Vocational	Teacher	Rural	Natural	Pit/others	Yes	Nurse	CHP	Yes	3	4	Yes	Yes	Yes	No	Don’t Know	Yes	No	Nurse	CHP	3	Born alive	Normal	Yes	6hrs	MCHAide	Yes	7	Nurse	Patient Home
268	Foidu	1	Kama Dakaleley	Kissi Kama	15	24	23	Yes	Junior Secondary	Christian	Kissi	2	2	1	Married	Farmer	<30	Vocational	Teacher	Rural	Natural	Pit/others	Yes	Nurse	CHP	Yes	2	6	Yes	Yes	Yes	Yes	2	Yes	No	MCHAide	CHP	3	Born alive	Normal	Yes	6hrs	MCHAide	Yes	10	MCHAide	Patient Home
269	Foidu	1	Kama Dakaleley	Kissi Kama	12	30	29	Yes	Primary	Christian	Kissi	4	4	2	Married	Farmer	<30	Senior Secondary	Farmer	Rural	Natural	Pit/others	Yes	Nurse	CHP	Yes	3	5	Yes	Yes	Yes	No	2	Yes	No	Nurse	CHP	3	Born alive	Normal	Yes	6hrs	Nurse	Yes	7	Nurse	Patient Home
270	Foidu	1	Kama Dakaleley	Kissi Kama	10	40	40	Yes	Primary	Christian	kissi	6	6	2	Married	Farmer	<30	None	Farmer	Rural	Natural	Pit/others	Yes	Nurse	CHP	Yes	3	5	Yes	Yes	Yes	No	3	Yes	No	MCHAide	CHP	3	Born alive	Normal	Yes	4hrs	MCHAide	Yes	5	MCHAide	Patient Home
271	Foidu	1	Kama Dakaleley	Kissi Kama	Always	20	19	Yes	Senior Secondary	Christian	Kissi	1	1	1	Single	Student	<30	No	No	Rural	Natural	Pit/others	Yes	Nurse	CHP	Yes	3	7	Yes	Yes	Yes	Yes	3	Yes	No	MCHAide	CHP	3	Born alive	Normal	Yes	6hrs	MCHAide	Yes	7	MCHAide	Patient Home
272	Foidu	1	Kama Dakaleley	Kissi Kama	10	25	24	No	None	Traditional	Kissi	3	3	2	Married	Farmer	<30	Junior Secondary	Farmer	Rural	Natural	Pit/others	Yes	Nurse	CHP	Yes	3	6	Yes	No	Yes	No	2	Yes	No	MCHAide	CHP	3	Born alive	Normal	Yes	3hrs	MCHAide	Yes	7	MCHAide	Patient Home
273	Foidu	1	Kama Dakaleley	Kissi Kama	18	20	18	Yes	Primary	Christian	Kissi	1	1	1	Single	Farmer	<30	No	No	Rural	Natural	Pit/others	Yes	Nurse	CHP	Yes	3	6	Yes	No	Yes	No	2	Yes	No	Nurse	CHP	5	Born alive	Normal	Yes	6hrs	Nurse	Yes	2	Nurse	Patient Home
274	Foidu	1	Kama Dakaleley	Kissi Kama	15	32	32	Yes	Junior Secondary	Christian	Kissi	4	5	2	Married	Trader	<30	Higher	Immigration Officer	Rural	Natural	Pit/others	Yes	Nurse	CHP	Yes	3	15	Yes	Yes	Yes	Yes	2	Yes	No	Nurse	CHC	3	Born alive	Normal	Yes	3hrs	MCHAide	Yes	7	TBA	Patient Home
275	Mano-Porboh	1	Kama Toh	Kissi Kama	5	24	23	No	None	Christian	Kissi	2	2	2	Married	Farmer	30-60	None	Farmer	Rural	Natural	Pit/others	Yes	Nurse	CHC	Yes	4	5	Yes	No	No	Yes	2	Yes	No	MCHAide	CHC	4	Born alive	Normal	Yes	7hrs	MCHAide	Yes	3	CHW	Patient Home
276	Mano-Porboh	1	Kama Toh	Kissi Kama	5	22	21	Yes	Senior Secondary	Christian	Kissi	1	1	1	Married	Student	30-60	Vocational	Teacher	Rural	Natural	Pit/others	Yes	Nurse	CHC	Yes	6	3	Yes	Yes	Yes	Yes	1	Yes	Yes	Midwife	CHC	4	Born alive	Normal	Yes	6hrs	Midwife	N0	0	0	0
277	Mano-Porboh	1	Kama Toh	Kissi Kama	17	36	35	No	None	Christian	Kissi	6	8	3	Married	Farmer	30-60	None	Farmer	Rural	Natural	Pit/others	Yes	Nurse	CHC	Yes	6	4	Yes	Yes	No	Yes	2	Yes	No	MCHAide	CHC	3	Born alive	Normal	Yes	12hrs	MCHAide	N0	0	0	0
278	Mano-Porboh	1	Kama Toh	Kissi Kama	Always	21	20	Yes	Junior Secondary	Christian	Kissi	1	1	1	Married	Farmer	30-60	Senior Secondary	Student	Rural	Natural	Pit/others	Yes	Nurse	CHC	Yes	4	6	Yes	No	No	Yes	2	Yes	Yes	Doctor	Hospital	40	Born alive	CS	Yes	3hrs	Doctor	N0	0	0	0
279	Mano-Porboh	1	Kama Toh	Kissi Kama	Always	25	24	Yes	Primary	Christian	Kissi	3	3	2	Married	Farmer	30-60	Primary	Farmer	Rural	Natural	Pit/others	Yes	Nurse	CHC	Yes	4	6	No	No	No	Yes	2	Yes	No	MCHAide	CHC	3	Born alive	Normal	Yes	6hrs	MCHAide	N0	0	0	0
280	Sagbeh	1	Kama Toh	Kissi Kama	Always	19	18	Yes	Primary	Christian	Kissi	1	1	1	Married	Housewife	30-60	Senior Secondary	Student	Rural	Natural	Pit/others	Yes	Nurse	CHC	Yes	4	4	Yes	Yes	Yes	Yes	1	Yes	No	TBA	CHC	4	Born alive	Normal	Yes	2hrs	MCHAide	N0	0	0	0
281	Sagbeh	1	Kama Toh	Kissi Kama	1	24	23	Yes	Senior Secondary	Christian	Kissi	1	1	1	Widow	Student	30-60	No	No	Rural	Natural	Pit/others	Yes	TBA	CHC	No	3	6	Yes	No	Yes	Yes	1	Yes	Yes	Doctor	Hospital	12	Born alive	CS	Yes	3hrs	Midwife	Yes	21	Midwife	Patient Home
282	Sagbeh	1	Kama Toh	Kissi Kama	8	33	32	Yes	Junior Secondary	Christian	Kissi	6	6	3	Married	Farmer	30-60	None	Farmer	Rural	Natural	Pit/others	Yes	TBA	CHC	No	4	3	Yes	Yes	Yes	Yes	3	Yes	No	TBA	CHC	3	Born alive	Normal	Yes	2hrs	MCHAide	N0	0	0	0
283	Sagbeh	1	Kama Toh	Kissi Kama	4	25	24	No	None	Christian	Kissi	3	5	3	Married	Farmer	>60	Junior Secondary	Farmer	Rural	Natural	Pit/others	Yes	TBA	CHC	No	Don’t know	1	No	Yes	Yes	No	3	Yes	No	MCHAide	CHC	3	Born alive	Normal	Yes	8hrs	MCHAide	N0	0	0	0
284	Sagbeh	1	Kama Toh	Kissi Kama	2	35	34	No	None	Christian	Kissi	6	6	3	Married	Farmer	30-60	None	Farmer	Rural	Natural	Pit/others	Yes	Nurse	CHC	Yes	4	3	Yes	Yes	Yes	Yes	3	Yes	No	MCHAide	CHC	3	Born alive	Normal	Yes	3hrs	MCHAide	N0	0	0	0
285	Bunumbu	4	kimaya	Peje West	1	27	27	Yes	Senior Secondary	Islam	Mende	1	2	1	Married	Student	30-60	Senior Secondary	Trader	Urban	Natural	Pit/others	Yes	Midwife	CHC	Yes	6	3	Yes	Yes	Yes	Yes	3	Yes	Yes	Midwife	CHC	1	Born alive	Normal	Yes	1hrs	Midwife	N0	0	0	0
286	Bunumbu	4	Kimaya	Peje West	2	19	18	Yes	Primary	Islam	Mende	1	1	1	Married	Housewife	30-60	Junior Secondary	Farmer	Urban	Natural	Pit/others	Yes	Midwife	CHC	Yes	5	3	Yes	No	Yes	Yes	2	Yes	Yes	Midwife	CHC	6	Born alive	Normal	Yes	1hrs	Midwife	N0	0	0	0
287	Bunumbu	4	Kimaya	Peje West	Always	33	33	No	None	Islam	Mende	4	5	1	Married	Farmer	>60	Higher	Teacher	Urban	Natural	Pit/others	Yes	Nurse	CHC	Yes	4	7	Yes	Yes	Yes	Yes	Don’t Know	Yes	No	MCHAide	CHP	2	Born alive	Normal	Yes	1hrs	MCHAide	Yes	5	MCHAide	Patient Home
288	Bunumbu	4	Kimaya	Peje West	1	30	30	Yes	Junior Secondary	Christian	Mende	3	3	2	Married	Housewife	30-60	None	Trader	Urban	Natural	Pit/others	Yes	Midwife	CHC	Yes	4	4	Yes	No	Yes	Yes	3	Yes	Yes	MIdwife	CHC	6hrs	Born alive	Normal	Yes	1hrs	Midwife	N0	0	0	0
289	Bunumbu	4	Kimaya	Peje West	Always	25	24	Yes	Primary	Islam	Mende	3	3	2	Married	Housewife	30-60	Higher	Teacher	Urban	Natural	Pit/others	Yes	Midwife	CHC	Yes	5	5	Yes	No	Yes	Yes	3	Yes	Yes	Midwife	CHC	4hrs	Born alive	Normal	No	None	None	N0	0	0	0
290	Bunumbu	4	Kimaya	Peje West	Always	19	18	Yes	Primary	Christian	Mende	1	1	1	Single	Skilled worker	30-60	No	No	Urban	Natural	Pit/others	Yes	Midwife	CHC	Yes	5	5	Yes	No	Yes	Yes	3	Yes	Yes	Midwife	CHC	6hrs	Born alive	Normal	Yes	1hrs	Midwife	Yes	1	Relative	Patient Home
291	Bunumbu	4	Kimaya	Peje West	Always	19	19	Yes	Junior Secondary	Islam	Mende	2	2	2	Married	Housewife	30-60	Junior Secondary	Maison	Urban	Natural	Pit/others	Yes	Midwife	CHC	Yes	4	3	Yes	Yes	Yes	Yes	2	Yes	Yes	Midwife	CHC	2hrs	Born alive	Normal	Yes	1hrs	Midwife	Yes	3	Relative	Patient Home
292	Bunumbu	4	Kimaya	Peje West	1	27	26	Yes	Junior Secondary	Islam	Mende	3	3	2	Married	Housewife	<30	Junior Secondary	Carpenter	Urban	Natural	Pit/others	Yes	Midwife	CHC	Yes	2	7	Yes	Yes	Yes	Yes	3	Yes	Yes	Midwife	CHC	4wks	Born alive	Normal	Yes	2hrs	Midwife	Yes	7	Relative	Patient Home
293	Bunumbu	4	Kimaya	Peje West	15	30	29	Yes	Junior Secondary	Christian	Mende	3	3	2	Married	Housewife	<30	Senior Secondary	Trader	Urban	Natural	Pit/others	Yes	Midwife	CHC	Yes	3	Don’t know	Yes	Yes	Yes	Yes	2	Yes	Yes	Midwife	CHC	2	Born alive	Normal	Yes	1hrs	Midwife	Yes	3	Relative	Patient Home
294	Bunumbu	4	Kimaya	Peje West	Always	35	35	Yes	Junior Secondary	Christian	Mende	4	5	1	Married	Hairdress	<30	Higher	NGO	Urban	Natural	Pit/others	Yes	Midwife	CHC	Yes	4	7	Yes	Yes	Yes	Yes	2	Yes	Yes	Midwife	CHC	3	Born alive	Normal	Yes	1hrs	Midwife	Yes	1	Relative	Patient Home
295	Jokibu	2	Kpindima	Peje West	1	23	22	Yes	Primary	Islam	Mende	2	2	2	Married	Trader	30-60	Junior Secondary	Miner	Rural	Natural	Pit/others	Yes	Midwife	CHC	Yes	4	6	Yes	No	Yes	Yes	1	Yes	Yes	Midwife	CHC	3	Born alive	Normal	Yes	2hrs	Midwife	N0	0	0	0
296	Jokibu	2	Kpindima	Peje West	Always	27	26	Yes	Junior Secondary	Islam	Mende	4	4	1	Married	Farmer	<30	None	Maison	Rural	Natural	Pit/others	Yes	Nurse	CHP	Yes	4	6	Yes	No	Yes	Yes	3	Yes	No	MCHAide	CHP	3	Born alive	Normal	Yes	2hrs	MCHAide	Yes	4	MCHAide	Patient Home
297	Jokibu	2	Kpindima	Peje West	10	29	27	Yes	Junior Secondary	Islam	Mende	2	2	1	Married	Farmer	<30	Junior Secondary	Farmer	Rural	Natural	Pit/others	Yes	Nurse	CHP	Yes	3	7	Yes	Yes	Yes	Yes	3	Yes	No	MCHAide	CHP	2	Born alive	Normal	Yes	2hrs	MCHAide	Yes	5	TBA	Patient Home
298	Jokibu	2	kpindima	Peje West	5	40	38	No	None	Islam	Mende	6	6	1	Married	Farmer	>60	None	Farmer	Rural	Natural	Pit/others	Yes	Nurse	CHP	Yes	4	6	Yes	Yes	Yes	Yes	2	Yes	No	MCHAide	CHP	3	Born alive	Normal	Yes	2hrs	MCHAide	Yes	2	MCHAide	Patient Home
299	Jokibu	2	Kpindima	Peje West	8	26	25	Yes	Primary	Islam	Mende	2	2	1	Married	Farmer	>60	Primary	Farmer	Rural	Natural	Pit/others	Yes	Nurse	CHP	Yes	3	6	Yes	Yes	Yes	Yes	3	Yes	No	MCHAide	CHP	2	Born alive	Normal	Yes	3hrs	MCHAide	Yes	3	MCHAide	Patient Home
300	Jokibu	2	Kpindima	Peje West	5	38	37	No	None	Islam	Mende	4	5	1	Married	Farmer	<30	Junior Secondary	Trader	Rural	Natural	Pit/others	Yes	Nurse	CHP	Yes	3	6	Yes	Yes	Yes	Yes	3	Yes	No	MCHAide	CHP	3	Born alive	Normal	Yes	3hrs	MCHAide	Yes	7	TBA	Patient Home
301	Jokibu	2	Kpindima	Peje West	12	22	21	Yes	Junior Secondary	Christian	Mende	2	2	1	Married	Farmer	<30	None	Farmer	Rural	Natural	Pit/others	Yes	Nurse	CHP	Yes	5	5	Yes	Yes	Yes	Yes	3	Yes	No	MCHAide	CHP	3	Born alive	Normal	Yes	4hrs	MCHAide	N0	0	0	0
302	Jokibu	2	Kpindima	Peje West	Always	30	29	No	None	Christian	Mende	3	3	2	Married	Farmer	30-60	None	Farmer	Rural	Natural	Pit/others	Yes	Nurse	CHP	Yes	3	7	Yes	Yes	Yes	Yes	3	Yes	No	MCHAide	CHP	3	Born alive	Normal	Yes	1hrs	MCHAide	N0	0	0	0
303	Jokibu	2	Kpindima	Peje West	1	38	36	No	None	Christian	Mende	5	5	2	Married	Farmer	<30	None	Farmer	Rural	Natural	Pit/others	Yes	Midwife	CHC	Yes	5	7	Yes	Yes	Yes	Yes	3	Yes	Yes	Midwife	CHC	5	Born alive	Normal	Yes	1hrs	Midwife	Yes	1	TBA	Patient Home
304	Jokibu	2	Kpindima	Peje West	Always	24	23	Yes	Junior Secondary	Islam	Mende	2	2	2	Married	Farmer	30-60	None	Farmer	Rural	Natural	Pit/others	Yes	Nurse	CHP	Yes	4	5	Yes	Yes	Yes	Yes	4	Yes	No	MCHAide	CHP	2	Born alive	Normal	No	0	None	Yes	4	MCHAide	Patient Home
305	Batiama	7	Golama	Peje West	Always	21	21	Yes	Senior Secondary	Islam	Mende	1	1	1	Single	Student	>60	No	No	Rural	Natural	Pit/others	Yes	Midwife	CHC	Yes	5	8	Yes	Yes	Yes	Yes	2	Yes	Yes	Midwife	CHC	1	Born alive	Normal	Yes	1hrs	Midwife	Yes	2	TBA	Patient Home
306	Batiama	7	Golama	Peje West	7	30	29	Yes	Junior Secondary	Islam	Mende	3	3	3	Married	Farmer	>60	Primary	Farmer	Rural	Natural	Pit/others	Yes	Midwife	CHC	Yes	4	3	Yes	Yes	Yes	Yes	3	Yes	Yes	Midwife	CHC	1	Born alive	Normal	Yes	5hrs	Midwife	Yes	3	TBA	Patient Home
307	Batiama	7	Golama	Peje West	4	27	26	Yes	Junior Secondary	Islam	Mende	1	1	1	Married	Farmer	>60	None	Farmer	Rural	Natural	Pit/others	Yes	Midwife	CHC	Yes	5	4	Yes	Yes	Yes	Yes	3	Yes	Yes	Midwife	CHC	2	Born alive	Normal	Yes	1hrs	Midwife	Yes	2	TBA	Patient Home
308	Batiama	7	Golama	Peje West	Always	35	34	Yes	Primary	Islam	Mende	4	4	2	Married	Farmer	>60	Primary	Farmer	Rural	Natural	Pit/others	Yes	Midwife	CHC	Yes	4	5	Yes	Yes	Yes	Yes	2	Yes	Yes	Midwife	CHC	2	Born alive	Normal	Yes	1hrs	Midwife	Yes	3	TBA	Patient Home
309	Batiama	7	Golama	Peje West	3	19	19	Yes	Primary	Christian	Mende	2twin	1	1	Married	Farmer	>60	Primary	Farmer	Rural	Natural	Pit/others	Yes	Midwife	CHC	Yes	5	5	Yes	Yes	Yes	Yes	1	Yes	Yes	Doctor	Private	14	Born alive	CS	Yes	1hrs	Nurse	N0	0	0	0
310	Batiama	7	Golama	Peje West	Always	19	19	Yes	Primary	Christian	Mende	1	1	1	Married	Farmer	>60	Primary	Farmer	Rural	Natural	Pit/others	Yes	Midwife	CHC	Yes	4	6	Yes	Yes	Yes	Yes	3	Yes	Yes	Midwife	CHC	1	Born alive	Normal	Yes	1hrs	Midwife	Yes	3	CHW	Patient Home
311	Batiama	7	Golama	Peje West	5	26	24	Yes	Primary	Islam	Mende	3	3	1	Married	Trader	>60	Junior Secondary	Farmer	Rural	Natural	pit/others	Yes	Midwife	CHC	Yes	4	5	Yes	Yes	Yes	Yes	2	Yes	No	MCHAide	CHC	3	Born alive	Normal	Yes	1hrs	Midwife	Yes	2	TBA	Patient Home
312	Batiama	7	Golama	Peje West	Always	30	30	Yes	Primary	Christian	Mende	4	4	2	Married	Farmer	>60	Primary	Farmer	Rural	Natural	Pit/others	Yes	Nurse	CHP	Yes	3	6	Yes	Yes	Yes	Yes	3	Yes	Yes	Midwife	CHC	1	Born alive	Normal	Yes	1hrs	Midwife	Yes	3	TBA	Patient Home
313	Batiama	7	Golama	Peje West	Always	33	33	No	None	Christian	Mende	4	4	2	Married	Farmer	>60	Junior Secondary	Farmer	Rural	Natural	Pit/others	Yes	Midwife	CHC	Yes	3	6	Yes	Yes	Yes	Yes	3	Yes	Yes	Midwife	CHC	3	Born alive	Normal	Yes	1hrs	Midwife	Yes	4	TBA	Patient Home
314	Batiama	7	Golama	Peje West	Always	20	20	Yes	Junior Secondary	Islam	Mende	1	2	2	Married	Student	>60	Primary	Maison	Rural	Natural	Pit/others	Yes	Nurse	CHP	Yes	3	5	Yes	Yes	Yes	Yes	2	Yes	Yes	Midwife	CHC	1	Born alive	normal	Yes	1hrs	Midwife	Yes	2	TBA	Patient Home
315	Gbalama	3	Lower Tongi Tongi	Kissi Tongi	Always	21	20	No	None	Christian	Kissi	1	1	1	Married	Farmer	>60	None	Farmer	Rural	Natural	Pit/others	Yes	Nurse	CHP	Yes	3	3	Yes	Yes	Yes	No	3	Yes	No	MCHAide	CHP	3	Born alive	Normal	Yes	3days	MCHAide	Yes	7	CHW	Patient Home
316	Gbalama	3	Lower Tongi Tongi	Kissi Tongi	Always	32	31	No	None	Islam	Kissi	5	5	2	Married	Trader	<30	Vocational	Driver	Rural	Modern	Pit/others	Yes	Midwife	CHC	Yes	3	5	Yes	No	Yes	Yes	3	Yes	Yes	Midwife	CHC	2	Born alive	Normal	Yes	3days	MCHAide	N0	0	0	0
317	Gbalama	3	Lower Tongi Tongi	Kissi Tongi	3	22	21	Yes	Junior Secondary	Christian	Kissi	1	1	1	Divorced	Trader	>60	No	No	Rural	Modern	Pit/others	Yes	Nurse	CHP	Yes	3	4	Yes	Yes	Yes	Yes	4	Yes	No	MCHAide	CHP	3	Born alive	Normal	Yes	3days	MCHAide	Yes	5	CHW	Patient Home
318	Gbalama	3	Lower Tongi Tongi	Kissi Kama	Always	35	34	No	None	Christian	Kissi	4	4	2	Separated	Trader	>60	No	No	Rural	Natural	Pit/others	Yes	Nurse	CHP	Yes	4	4	Yes	Yes	Yes	Yes	3	Yes	Yes	Midwife	CHC	3	Born alive	Normal	Yes	3hrs	Midwife	Yes	7	CHW	Patient Home
319	Gbalama	3	Lower Tongi Tongi	Kissi Tongi	Always	35	34	No	None	Christian	Kissi	4	4	2	Married	Farmer	>60	Junior Secondary	Farmer	Rural	Modern	Pit/others	Yes	Midwife	CHC	Yes	3	6	Yes	Yes	Yes	Yes	4	Yes	Yes	Midwife	CHC	3	Born alive	Normal	Yes	2hrs	Midwife	N0	0	0	0
320	Gbalama	3	Lower Tongi Tongi	Kissi Tongi	Always	43	42	No	None	Christian	Kissi	7	7	2	Married	Farmer	>60	Primary	Farmer	Rural	Natural	Pit/others	Yes	Nurse	CHP	Yes	3	6	Yes	No	Yes	Yes	2	Yes	No	MCHAide	CHP	3	Born alive	Normal	Yes	2	MCHAide	N0	0	0	0
321	Gbalama	3	Lower Tongi Tongi	Kissi Tongi	Always	20	19	Yes	Junior Secondary	Christian	Kissi	2	2	1	Single	Farmer	>60	No	No	Rural	Natural	Pit/others	Yes	Midwife	CHP	Yes	3	5	Yes	Yes	Yes	Yes	3	Yes	No	MCHAide	CHP	3	Born alive	Normal	Yes	3hrs	MCHAide	Yes	3	TBA	Patient Home
322	Gbalama	3	Lower Tongi Tongi	Kissi Tongi	Always	19	18	No	None	Christian	Kissi	1	1	1	Married	Hairdress	<30	None	Farmer	Rural	Natural	Pit/others	Yes	Midwife	CHC	Yes	3	7	Yes	Yes	Yes	Yes	4	Yes	Yes	Midwife	CHC	3	Born alive	Normal	Yes	3hrs	Midwife	N0	0	0	0
323	Gbalama	3	Lower Tongi Tongi	Kissi Tongi	Always	20	19	No	None	Islam	Kissi	1	1	1	Single	Farmer	>60	No	No	Rural	Natural	Pit/others	Yes	Nurse	CHP	Yes	3	7	Yes	Yes	Yes	Yes	2	Yes	No	MCHAide	CHP	3	Born alive	Normal	Yes	3hrs	MCHAide	N0	0	0	0
324	Gbalama	3	Lower Tongi Tongi	Kissi Tongi	Always	20	19	Yes	Senior Secondary	Christian	Kissi	1	1	1	Married	Housewife	>60	Junior Secondary	Trader	Rural	Natural	Pit/others	Yes	Nurse	CHP	Yes	3	5	Yes	Yes	Yes	Yes	3	Yes	Yes	Doctor	Hospital	3	Born alive	Assisted	Yes	1hrs	Midwife	Yes	14	TBA	Patient Home
325	Gborwobu Gao	6	Gao	Luawa	3	17	15	Yes	Junior Secondary	Islam	Mende	1	1	1	Married	Trader	<30	None	Trader	Urban	Modern	Flush	Yes	Midwife	Hospital	Yes	3	4	Yes	Yes	Yes	Yes	5	Yes	Yes	Midwife	Hospital	3	Born alive	Normal	Yes	1hrs	Nurse	Yes	2	Nurse	Patient Home
326	Gborwobu Gao	6	Gao	Luawa	10	25	24	No	None	Islam	Mende	4	4	2	Married	Farmer	<30	None	Farmer	Urban	Modern	Flush	Yes	Nurse	CHP	Yes	3	6	Yes	Yes	Yes	Yes	4	Yes	No	MCHAide	CHP	3	Born alive	Normal	Yes	1	MCHAide	Yes	3	MCHAide	Patient Home
327	Gborwobu Gao	6	Gao	Luawa	8	23	22	Yes	Junior Secondary	Islam	Mende	3	3	1	Married	Farmer	<30	Senior Secondary	Farmer	Urban	Natural	Pit/others	Yes	Nurse	CHP	Yes	3	7	Yes	Yes	Yes	Yes	4	Yes	No	MCHAide	CHP	3	Born alive	Normal	Yes	3	MCHAide	Yes	2	MCHAide	Patient Home
328	Gborwobu Gao	6	Gao	Luawa	4	20	20	Yes	Primary	Islam	Kissi	1	1	1	Married	Farmer	<30	Senior Secondary	Bike rider	Urban	Natural	Pit/others	Yes	MCHAide	MCHP	No	5	5	Yes	Yes	Yes	Yes	3	Yes	No	MCHAide	MCHP	3	Born alive	Normal	Yes	1	MCHAide	N0	0	0	0
329	Gborwobu Gao	6	Gao	Luawa	7	20	19	No	None	Islam	Mende	2	2	1	Married	Farmer	<30	Senior Secondary	Imam	Urban	Natural	Pit/others	Yes	Nurse	CHP	Yes	3	6	Yes	Yes	Yes	Yes	4	Yes	No	MCHAide	CHP	3	Born alive	Normal	Yes	1	Nurse	Yes	2	MCHAide	Patient Home
330	Gborwobu Gao	6	Gao	Luawa	3	21	19	No	None	Islam	Mende	2	2	2	Widow	Farmer	<30	No	No	Urban	Natural	Pit/others	Yes	Nurse	CHP	Yes	3	4	Yes	Yes	Yes	Yes	4	Yes	No	MCHAide	CHP	3	Born alive	Normal	Yes	2	MCHAide	Yes	2	MCHAide	Patient Home
331	Gborwobu Gao	6	Gao	Luawa	Always	25	24	No	None	Islam	Mende	2	2	2	Married	Farmer	<30	None	Farmer	Urban	Natural	Pit/others	Yes	Nurse	CHP	Yes	2	8	Yes	Yes	Yes	Yes	4	Yes	No	MCHAide	CHP	3	Born alive	Normal	Yes	3	Nurse	Yes	2	Nurse	Patient Home
332	Gborwobu Gao	6	Gao	Luawa	Always	21	19	No	None	Islam	Mende	2	2	1	Married	Farmer	<30	None	Farmer	Urban	Natural	Pit/others	Yes	Nurse	CHP	Yes	2	7	Yes	Yes	Yes	Yes	4	Yes	No	MCHAide	CHP	3	Born alive	Normal	Yes	3hrs	Nurse	N0	0	0	0
333	Gborwobu Gao	6	Gao	Luawa	1	26	25	Yes	Senior Secondary	Islam	Mende	1	1	1	Living together	Student	<30	Vocational	Teacher	Urban	Natural	Pit/others	Yes	Nurse	CHP	Yes	6	4	Yes	No	Yes	No	4	Yes	No	MCHAide	CHP	3	Born alive	Normal	Yes	2hrs	Nurse	Yes	1	MCHAide	Patient Home
334	Gborwobu Gao	6	Gao	Luawa	10	25	23	Yes	Primary	Islam	Mende	4	4	2	Married	Farmer	<30	Junior Secondary	Bike rider	Urban	Natural	Pit/others	Yes	Nurse	CHP	Yes	3	7	Yes	Yes	Yes	Yes	3	Yes	No	Nurse	CHP	3	Born alive	Normal	Yes	6hrs	MCHAide	Yes	2	MCHAide	Patient Home
335	Kokombu	17	Upper kpombali	Luawa	5	30	28	No	None	Islam	Mende	5	5	3	Married	Farmer	<30	Primary	Trader	Rural	Natural	Pit/others	Yes	Nurse	CHP	Yes	3	4	Yes	Yes	Yes	Yes	3	Yes	No	MCHAide	CHP	3hrs	Born alive	Normal	No	0	0	0	0	0	0
336	Kokombu	17	Upper kpombali	Luawa	8	30	29	No	None	Islam	Mende	5	5	2	Married	Farmer	>60	None	Farmer	Rural	Natural	Pit/others	Yes	Nurse	CHP	Yes	2	8	Yes	Yes	Yes	Yes	3	Yes	No	MCHAide	CHP	1	Born alive	Normal	Yes	1	MCHAide	Yes	2	MCHAide	Patient Home
337	Kokombu	17	Upper kpombali	Luawa	Always	26	24	Yes	Primary	Islam	Mende	3	3	1	Married	Farmer	>60	Vocational	Maison	Rural	Natural	Pit/others	Yes	Nurse	CHP	Yes	2	9	Yes	Yes	Yes	Yes	2	Yes	No	MCHAide	CHP	1	Born alive	Normal	Yes	6hrs	MCHAide	N0	0	0	0
338	Senga	17	Upper kpombali	Luawa	4	21	19	Yes	Junior Secondary	Islam	Temne	2	2	2	Married	Student	>60	Junior Secondary	Farmer	Rural	Natural	Pit/others	Yes	Nurse	CHP	Yes	4	8	Yes	No	Yes	Yes	3	Yes	No	MCHAide	CHP	2	Born alive	Normal	Yes	5hrs	MCHAide	N0	0	0	0
339	Senga	17	Upper kpombali	Luawa	1	19	18	Yes	Junior Secondary	Islam	Mende	1	1	1	Single	Student	<30	No	No	Rural	Natural	Pit/others	Yes	Nurse	Hospital	Yes	2	10	Yes	Yes	Yes	Yes	3	Yes	Yes	Midwife	Hospital	3	Born alive	Normal	Yes	1hrs	Midwife	N0	0	0	0
340	Senga	17	Upper kpombali	Luawa	1	20	19	No	None	Islam	Mende	1	1	1	Married	Farmer	>60	None	Farmer	Rural	Natural	Pit/others	Yes	Nurse	CHP	Yes	4	5	Yes	Yes	Yes	Yes	2	Yes	No	MCHAide	CHP	3	Born alive	Normal	Yes	4hrs	MCHAide	N0	0	0	0
341	Bandoma	17	Upper kpombali	Luawa	5	21	19	No	None	Islam	Mende	2	2	2	Married	Farmer	>60	Vocational	Farmer	Rural	Natural	pit/others	Yes	Nurse	CHP	Yes	4	7	Yes	No	Yes	Yes	3	Yes	No	MCHAide	CHP	3	Born alive	Normal	Yes	1hrs	MChAide	N0	0	0	0
342	Levuma	17	Upper kpombali	Luawa	6	19	17	Yes	Junior Secondary	Islam	Mende	1	1	1	Single	Student	>60	No	No	Rural	Natural	Pit/others	Yes	Nurse	CHP	Yes	3	8	Yes	Yes	Yes	Yes	4	Yes	No	MCHAide	CHP	1	Born alive	Normal	Yes	5hrs	MCHAide	N0	0	0	0
343	Levuma	17	Upper kpombali	Luawa	10	22	20	Yes	Primary	Islam	Mende	3	3	1	Married	Farmer	>60	Primary	Farmer	Rural	Natural	Pit/others	Yes	Nurse	CHP	Yes	3	7	Yes	Yes	Yes	Yes	3	Yes	No	MCHAide	CHP	1	Born alive	Normal	Yes	1	MCHAide	Yes	2	MCHAide	Patient Home
344	Bandoma	17	Upper kpombali	Luawa	7	30	28	No	None	Islam	Mende	5	5	2	Married	Farmer	>60	None	Farmer	Rural	Natural	Pit/others	Yes	Nurse	CHP	Yes	4	6	Yes	Yes	Yes	Yes	3	Yes	No	MCHAide	CHP	1	Born alive	Normal	Yes	4hrs	MCHAide	N0	0	0	0
345	Nyandehun	11	Upper kpombali	Luawa	2	35	33	No	None	Islam	Mende	3	3	1	Living together	Trader	<30	None	Farmer	Urban	Natural	Pit/others	Yes	Nurse	CHP	Yes	3	6	Yes	No	Yes	No	2	Don’t know	No	Nurse	CHP	1	Born alive	Normal	Yes	3hrs	Nurse	Yes	2	TBA	Patient Home
346	Nyandehun	11	Upper kpombali	Luawa	5	30	30	No	None	Islam	Limba	4	4	2	Married	Farmer	<30	Primary	Farmer	Urban	Natural	Pit/others	Yes	Nurse	CHP	Yes	3	4	Yes	No	Yes	Yes	3	Yes	No	MCHAide	CHP	5	Born alive	Normal	No	0	0	N0	0	0	0
347	Nyandehun	11	Upper kpombali	Luawa	19	25	23	No	None	Islam	Mende	5	5	2	Married	Farmer	>60	None	Farmer	Urban	Natural	Pit/others	Yes	Nurse	CHP	Yes	3	5	Yes	No	Yes	Yes	2	Yes	No	MCHAide	CHP	1	Born alive	Normal	Yes	1	MCHAide	N0	0	0	0
348	Nyandehun	11	Upper kpombali	Luawa	4	28	26	Yes	Primary	Islam	Mende	3	3	2	Married	Farmer	<30	None	Farmer	Urban	Natural	Flush	Yes	Nurse	CHP	Yes	4	9	Yes	No	Yes	Yes	2	Yes	No	MCHAide	CHP	2	Born alive	Normal	Yes	1	MCHAide	N0	0	0	0
349	Nyandehun	11	Upper kpombali	Luawa	Always	19	18	Yes	Primary	Islam	Mende	1	1	1	Married	Farmer	<30	Senior Secondary	Maison	Urban	Natural	Pit/others	Yes	Nurse	CHP	Yes	1	9	Yes	No	Yes	Yes	1	Yes	No	MCHAide	CHP	1	Born alive	Normal	No	0	o	N0	0	0	0
350	Nyandehun	11	Upper kpombali	Luawa	4	35	33	No	None	Islam	Mandingo	5	5	2	Single	Trader	<30	No	No	Urban	Natural	Pit/others	Yes	Nurse	CHP	Yes	3	6	Yes	Yes	Yes	Yes	2	Yes	Yes	Midwife	Hospital	3	Born alive	Normal	Yes	4hrs	Midwife	Yes	6	MCHAide	Patient Home
351	Nyandehun	11	Upper kpombali	Luawa	4	20	18	Yes	Junior Secondary	Islam	Mende	1	1	1	Married	Trader	<30	Junior Secondary	Farmer	Urban	Natural	Pit/others	Yes	Nurse	CHP	Yes	4	6	No	No	Yes	Yes	3	Don’t know	No	TBA	CHP	1	Born alive	Normal	No	0	0	Yes	3	MCHAide	Patient Home
352	Nyandehun	11	Upper kpombali	Luawa	11	28	27	No	None	Christian	Mende	5	5	2	Married	Farmer	<30	None	Farmer	Urban	Natural	Pit/others	Yes	Nurse	CHP	Yes	3	4	Yes	No	Yes	Yes	2	Yes	No	MCHAide	CHP	1	Born alive	Normal	Yes	5hrs	MCHAide	N0	0	0	0
353	Nyandehun	11	Upper kpombali	Luawa	2	28	27	No	None	Islam	Mende	5	5	3	Married	Farmer	<30	None	Carpenter	Urban	Natural	Pit/others	Yes	Nurse	CHP	Yes	4	5	Yes	Yes	Yes	Yes	2	Yes	No	MCHAide	CHP	4	Born alive	Normal	Yes	3hrs	MCHAide	N0	0	0	0
354	Nyandehun	11	Upper kpombali	Luawa	Always	27	25	No	None	Islam	Mende	4	4	2	Married	Farmer	<30	Vocational	Maison	Urban	Natural	Pit/others	Yes	Nurse	CHP	Yes	3	8	Yes	Yes	Yes	Yes	3	Yes	No	MCHAide	CHP	3hrs	Born alive	Normal	No	0	0	N0	0	0	0
355	Fangamadu	4	Upper Tongi Tongi	Kissi Tongi	15	35	34	No	None	Islam	Kissi	4	4	1	Married	Housewife	>60	Junior Secondary	CDD	Rural	Natural	Pit/others	Yes	Nurse	CHP	Yes	4	6	Yes	No	Yes	Yes	3	Yes	No	MCHAide	CHP	3	Born alive	Normal	Yes	1hrs	MCHAide	Yes	2	MCHAide	Other home
356	Fangamadu	4	Upper Tongi Tongi	Kissi Tongi	10	43	42	No	None	Islam	Kissi	5	5	2	Married	Housewife	>60	None	Town Chief	Rural	Natural	Pit/others	Yes	Nurse	CHP	Yes	5	6	Yes	No	Yes	Yes	2	Yes	No	MCHAide	CHP	4	Born alive	Normal	Yes	1hrs	MCHAide	N0	0	0	0
357	Fangamadu	4	Upper Tongi Tongi	Kissi Tongi	11	36	35	Yes	Junior Secondary	Christian	Kissi	4	4	1	Married	Housewife	>60	Junior Secondary	Farmer	Rural	Natural	Pit/others	Yes	Nurse	CHP	Yes	3	7	Yes	No	Yes	Yes	2	Yes	Yes	Midwife	CHC	3	Born alive	Normal	Yes	1hrs	MCHAide	N0	0	0	0
358	Fangamadu	4	Upper Tongi Tongi	Kissi Tongi	Always	35	34	Yes	Primary	Islam	Kissi	4	4	1	Married	Housewife	>60	Junior Secondary	Farmer	Rural	Natural	Pit/others	Yes	Nurse	CHP	Yes	3	6	Yes	No	Yes	Yes	2	Yes	No	TBA	CHP	3	Born alive	Normal	Yes	1hrs	MCHAide	Yes	5	MCHAide	Other home
359	Fangamadu	4	Upper Tongi Tongi	Kissi Tongi	Always	40	39	Yes	Primary	Islam	Kissi	6	6	2	Married	Housewife	>60	Primary	Imam	Rural	Natural	Pit/others	Yes	Nurse	CHP	Yes	3	7	Yes	No	Yes	Yes	3	Yes	No	TBA	CHP	3	Born alive	Normal	Yes	1hrs	MCHAide	Yes	4	MCHAide	Other home
360	Woledu	4	Upper Tongi Tongi	Kissi Tongi	5	38	37	Yes	Primary	Christian	Kissi	4	4	2	Married	Housewife	>60	None	Farmer	Rural	Natural	Pit/others	Yes	Nurse	CHP	Yes	3	6	Yes	No	Yes	Yes	3	Yes	No	MCHAide	CHP	4	Born alive	Normal	Yes	1hrs	MCHAide	Yes	4	MCHAide	Other home
361	Woledu	4	Upper Tongi Tongi	Kissi Tongi	5	30	29	No	None	Christian	Kissi	6	6	1	Separated	Farmer	>60	No	No	Rural	Natural	Pit/others	Yes	Nurse	CHP	Yes	5	5	Yes	No	Yes	Yes	2	Yes	No	TBA	Other Home	7	Born alive	Normal	Yes	1hrs	Nurse	Yes	3	Nurse	Other home
362	Woledu	4	Upper Tongi Tongi	Kissi Tongi	4	40	39	No	None	Christian	Kissi	5	5	2	Married	Housewife	>60	None	Farmer	Rural	Natural	Pit/others	Yes	Nurse	CHP	Yes	3	7	Yes	No	Yes	Yes	3	Yes	No	MCHAide	CHP	3	Born alive	Normal	Yes	1hrs	MCHAide	Yes	4	MCHAide	Other home
363	Woledu	4	Upper Tongi Tongi	Kissi Tongi	4	25	24	Yes	Primary	Christian	Kissi	2	2	1	Separated	Farmer	>60	Junior Secondary	Bike rider	Rural	Natural	Pit/others	Yes	Nurse	CHP	Yes	3	5	Yes	No	Yes	Yes	3	Yes	No	MCHAide	CHP	5	Born alive	Normal	Yes	1hrs	MCHAide	N0	0	0	0
364	Woledu	4	Upper Tongi Tongi	Kissi Tongi	25	40	39	No	None	Christian	Kissi	6	6	2	Married	Housewife	>60	None	Farmer	Rural	Natural	Pit/others	Yes	Nurse	CHP	Yes	3	6	Yes	No	Yes	Yes	3	Yes	No	MCHAide	CHP	3	Born alive	Normal	Yes	1hrs	MCHAide	Yes	6	MCHAide	Other home
365	Taidu	8	Upper Konio	Kissi Tongi	1	31	30	Yes	Junior Secondary	Christian	Kissi	6	6	3	Married	Farmer	>60	Primary	Farmer	Rural	Natural	Pit/others	Yes	MCHAide	MCHP	Yes	4	2	Yes	Yes	Yes	Yes	2	Yes	No	MCHAide	MCHP	3	Born alive	Normal	Yes	1hrs	Nurse	Yes	21	CHW	Patient Home
366	Taidu	8	Upper Konio	Kissi Tongi	1	20	19	Yes	Senior Secondary	Christian	Kissi	1	1	1	Single	Student	30-60	No	No	Rural	Natural	Pit/others	Yes	TBA	MCHP	No	2	3	Yes	Yes	Yes	Yes	2	Yes	No	MCHAide	MCHP	3	Born alive	Normal	Yes	1hrs	Nurse	Yes	4	CHW	Patient Home
367	Taidu	8	Upper Konio	Kissi Tongi	7	22	21	Yes	Junior Secondary	Christian	kissi	2	2	2	Married	Farmer	30-60	Junior Secondary	Farmer	Rural	Natural	Pit/others	Yes	MCHAide	MCHP	Yes	3	7	Yes	Yes	Yes	Yes	2	Yes	No	MCHAide	MCHP	3	Born alive	Normal	Yes	1	MCHAide	Yes	3	CHW	Patient Home
368	Taidu	8	Upper Konio	Kissi Tongi	Always	18	18	Yes	Junior Secondary	Christian	Kissi	1	1	1	Single	Farmer	30-60	No	No	Rural	Natural	Pit/others	Yes	MCHAide	MCHP	Yes	3	5	Yes	Yes	Yes	Yes	2	Yes	No	MCHAide	MCHP	2	Born alive	Normal	Yes	3hrs	MCHAide	Yes	5	CHW	Patient Home
369	Taidu	8	Upper Konio	Kissi Tongi	Always	26	25	No	None	Christian	Kissi	3	3	1	Married	Farmer	30-60	None	Farmer	Rural	Natural	Pit/others	Yes	MCHAide	MCHP	Yes	3	5	Yes	Yes	Yes	Yes	2	Yes	No	MCHAide	MCHP	3	Born alive	Normal	Yes	3hrs	MCHAide	Yes	14	CHW	Patient Home
370	Taidu	8	Upper Konio	Kissi Tongi	16	32	31	No	None	Christian	Kissi	4	4	2	Married	Farmer	30-60	None	Farmer	Rural	Natural	Pit/others	Yes	MCHAide	MCHP	Yes	2	6	Yes	Yes	Yes	Yes	2	Yes	No	MCHAide	MCHP	3	Born alive	Normal	Yes	3hrs	MCHAide	Yes	14	CHW	Patient Home
371	Taidu	8	Upper Konio	Kissi Tongi	6	33	33	No	None	Islam	Kissi	3	3	2	Married	Farmer	30-60	None	Farmer	Rural	Natural	Pit/others	Yes	MCHAide	MCHP	Yes	3	6	Yes	Yes	Yes	Yes	2	Yes	No	MCHAide	MCHP	3	Born alive	Normal	Yes	6hrs	MCHAide	Yes	21	Nurse	CHC
372	Taidu	8	Upper Konio	Kissi Tongi	Always	20	19	No	None	Christian	Kissi	1	1	1	Married	Farmer	30-60	None	Farmer	Rural	Natural	Pit/others	Yes	MCHAide	MCHP	Yes	3	4	Yes	Yes	Yes	Yes	2	Yes	Yes	Doctor	Hospital	7	Born alive	CS	Yes	12hrs	Doctor	N0	0	0	0
373	Taidu	8	Upper Konio	Kissi Tongi	Always	39	38	No	None	Christian	Kissi	8	8	2	Married	Farmer	>60	Junior Secondary	Farmer	Rural	Natural	Pit/others	Yes	Midwife	CHC	Yes	3	6	Yes	Yes	Yes	Yes	2	Yes	No	MCHAide	CHC	3	Born alive	Normal	Yes	3hrs	Nurse	N0	0	0	0
374	Taidu	8	Upper Konio	Kissi Tongi	Always	30	29	Yes	Primary	Islam	Kissi	3	3	1	Married	Farmer	>60	None	Trader	Rural	Natural	Pit/others	Yes	Nurse	MCHP	Yes	3	5	Yes	Yes	Yes	Yes	2	Yes	No	MCHAide	MCHP	2	Born alive	Normal	Yes	2days	MCHAide	Yes	12	CHW	Patient Home
375	Kpama	1	Bende Bengu	Kissi Tongi	16	40	39	No	None	Christian	Kissi	7	7	2	Married	Housewife	>60	None	Farmer	Rural	Natural	Pit/others	Yes	Nurse	MCHP	Yes	4	4	Yes	No	Yes	Yes	2	Yes	No	MCHAide	MCHP	3	Born alive	Normal	Yes	3hrs	MCHAide	N0	0	0	0
376	Kpama	1	Bende Bengu	Kissi Tongi	5	30	29	No	None	Christian	Kissi	3	3	2	Married	Housewife	>60	None	Farmer	Rural	Natural	Pit/others	Yes	Nurse	MCHP	Yes	3	5	Yes	No	Yes	Yes	2	Yes	No	MCHAide	MCHP	3	Born alive	Normal	Yes	3hrs	MCHAide	N0	0	0	0
377	Kpama	1	Bende Bengu	Kissi Tongi	18	40	39	No	None	Christian	Kissi	7	7	3	Married	Housewife	>60	None	Farmer	Rural	Natural	Pit/others	Yes	Nurse	MCHP	Yes	3	5	Yes	No	Yes	Yes	2	Yes	No	TBA	MCHP	3	Born alive	Normal	Yes	2hrs	MCHAide	N0	0	0	0
378	Kpama	1	Bende Bengu	Kissi Tongi	Always	30	29	Yes	Junior Secondary	Christian	Kissi	3	3	2	Married	Housewife	>60	Junior Secondary	Farmer	Rural	Natural	Pit/others	Yes	TBA	MCHP	No	3	4	Yes	No	Yes	Yes	2	Yes	No	TBA	MCHP	3	Born alive	Normal	Yes	2hrs	TBA	N0	0	0	0
379	Kpama	1	Bende Bengu	Kissi Tongi	18	40	40	No	None	Christian	Kissi	6	6	2	Married	Housewife	>60	None	Farmer	Rural	Natural	Pit/others	Yes	Nurse	MCHP	Yes	4	5	Yes	No	Yes	Yes	2	Yes	No	TBA	MCHP	3	Born alive	Normal	Yes	4hrs	MCHAide	N0	0	0	0
380	Yekpadu	1	Bende Bengu	Kissi Tongi	15	20	19	No	None	Christian	Kissi	1	1	1	Married	Housewife	>60	Senior Secondary	Teacher	Rural	Natural	Pit/others	Yes	TBA	MCHP	No	5	4	Yes	No	Yes	Yes	3	Yes	No	MCHAide	MCHP	3	Born alive	normal	Yes	2hrs	MCHAide	N0	0	0	0
381	Yekpadu	1	Bende Bengu	Kissi Tongi	10	30	29	Yes	Junior Secondary	Christian	Kissi	4	4	2	Married	Housewife	>60	Senior Secondary	CHW	Rural	Natural	Pit/others	Yes	TBA	MCHP	No	3	6	Yes	No	Yes	Yes	2	Yes	No	MCHAide	MCHP	3	Born alive	Normal	Yes	1hrs	MCHAide	N0	0	0	0
382	Yekpadu	1	Bende Bengu	Kissi Tongi	20	31	30	No	None	Christian	Kissi	5	5	2	Married	Housewife	>60	Senior Secondary	CHW	Rural	Natural	Pit/others	Yes	Nurse	MCHP	Yes	3	6	Yes	No	Yes	Yes	3	Yes	No	MCHAide	MCHP	3	Born alive	Normal	Yes	1hrs	MCHAide	N0	0	0	0
383	Bandenin	1	Bende Bengu	Kissi Tongi	5	36	35	No	None	Traditional	Kissi	3	3	2	Married	Housewife	>60	Junior Secondary	CHW	Rural	Natural	Pit/others	Yes	Nurse	MCHP	Yes	2	6	Yes	No	Yes	Yes	2	Yes	No	MCHAide	MCHP	3	Born alive	Normal	Yes	1hrs	MCHAide	Yes	4	TBA	Other home
384	Bandenin	1	Bende Bengu	Kissi Tongi	2	35	34	Yes	Primary	Christian	Kissi	3	3	2	Married	Housewife	>60	Junior Secondary	Farmer	Rural	Natural	Pit/others	Yes	Nurse	MCHP	Yes	3	4	Yes	No	Yes	Yes	2	Yes	No	MCHAide	MCHP	3	Born alive	Normal	Yes	1hrs	MCHAide	N0	0	0	0
385	Buedu	10	Lower Konio	Kissi Tongi	2	23	22	Yes	Senior Secondary	Christian	Kissi	1	1	1	Single	None	<30	No	No	Urban	Modern	Flush	Yes	Midwife	CHC	Yes	5	7	Yes	Yes	Yes	Yes	1	Yes	No	TBA	CHC	3	Born alive	Normal	Yes	1hrs	MCHAide	N0	0	0	0
386	Buedu	10	Lower Konio	Kissi Tongi	Always	17	16	Yes	Junior Secondary	Islam	Kissi	1	1	1	Married	Farmer	<30	Vocational	Mechanic	Urban	Natural	Pit/others	Yes	Midwife	CHC	Yes	3	4	Yes	No	Yes	Yes	3	Yes	Yes	Midwife	CHC	3	Born alive	Assisted	No	0	0	N0	0	0	0
387	Buedu	10	Lower Konio	Kissi Tongi	Always	28	27	Yes	Primary	Christian	Kissi	3	5	2	Married	Farmer	<30	None	Farmer	Urban	Modern	Pit/others	Yes	Nurse	CHC	Yes	4	5	Yes	Yes	Yes	Yes	3	Yes	No	MCHAide	CHC	3	Born alive	Assisted	Yes	3hrs	MCHAide	N0	0	0	0
388	Buedu	10	Lower Konio	Kissi Tongi	Always	25	25	Yes	Primary	Christian	Kissi	3	3	2	Married	Housewife	<30	Junior Secondary	Driver	Urban	Modern	Pit/others	Yes	Midwife	CHC	Yes	4	5	Yes	Yes	Yes	Yes	2	Yes	Yes	Midwife	CHC	3	Born alive	Assisted	Yes	3days	Midwife	N0	0	0	0
389	Buedu	10	Lower Konio	Kissi Tongi	Always	21	20	Yes	Junior Secondary	Islam	Fullah	2	2	1	Married	Hairdress	<30	Senior Secondary	Trader	Urban	Natural	Pit/others	Yes	Midwife	CHP	Yes	2	5	Yes	Yes	Yes	Yes	3	Yes	No	MCHAide	CHC	3	Born alive	Normal	Yes	3	MCHAide	N0	0	0	0
390	Buedu	10	Lower Konio	Kissi Tongi	Always	30	29	No	None	Christian	Kissi	5	5	2	Married	Farmer	<30	None	TH	Urban	Modern	Pit/others	Yes	Midwife	CHC	Yes	4	5	Yes	Yes	Yes	Yes	4	Yes	Yes	Midwife	CHC	2	Born alive	Normal	Yes	2	MCHAide	N0	0	0	0
391	Buedu	10	Lower Konio	Kissi Tongi	Always	18	17	Yes	Junior Secondary	Christian	Kissi	2	2	1	Married	Farmer	<30	Primary	Trader	Urban	Natural	Pit/others	Yes	Midwife	CHC	Yes	3	9	Yes	Yes	Yes	Yes	3	Yes	Yes	Midwife	CHC	3	Born alive	Normal	Yes	3	MCHAide	N0	0	0	0
392	Buedu	10	Lower Konio	Kissi Tongi	Always	30	29	No	None	Christian	Kissi	5	5	1	Married	Farmer	<30	None	Farmer	Urban	Modern	Pit/others	Yes	Midwife	CHC	Yes	4	5	Yes	Yes	Yes	Yes	2	Yes	Yes	Doctor	Hospital	7	Born alive	CS	Yes	1hrs	Doctor	Yes	2	MCHAide	Patient Home
393	Buedu	10	Lower Konio	Kissi Tongi	Always	46	45	No	None	Christian	Kissi	6	6	2	Married	Farmer	<30	None	Maison	Urban	Natural	Pit/others	Yes	Midwife	CHC	Yes	Don’t know	1	Yes	Yes	Yes	Yes	2	Yes	Yes	Midwife	CHC	3	Born alive	Normal	Yes	3hrs	Midwife	N0	0	0	0
394	Buedu	10	Lower Konio	Kissi Tongi	Always	28	27	No	None	Christian	Kissi	3	3	2	Married	Farmer	<30	Junior Secondary	Farmer	Urban	Natural	Pit/others	Yes	Midwife	CHC	Yes	3	4	Yes	Yes	Yes	Yes	3	Yes	Yes	Midwife	CHC	1	Born alive	Normal	Yes	24hrs	MCHAide	Yes	7	TBA	Patient Home
395	Foindu	4	Marwei	Peje Bongre	Always	20	19	No	None	Christian	Mende	2	2	2	Married	Farmer	>60	Senior Secondary	Farmer	Rural	Natural	Pit/others	Yes	Nurse	CHC	Yes	3	10	Yes	No	Yes	No	2	Yes	No	MCHAide	CHC	3	Born alive	Normal	Yes	1hrs	MCHAide	Yes	1	TBA	Patient Home
396	Foindu	4	Marwei	Peje Bongre	1	18	17	Yes	Junior Secondary	Christian	Kissi	1	1	1	Married	Farmer	>60	None	Farmer	Rural	Natural	Pit/others	Yes	Nurse	CHP	Yes	4	10	Yes	Yes	Yes	No	2	Yes	Yes	Midwife	Hospital	7	Born alive	Normal	Yes	1hrs	Midwife	N0	0	0	0
397	Foindu	4	Marwei	Peje Bongre	5	21	20	Yes	Primary	Christian	Mende	2	2	1	Married	Farmer	>60	Primary	Farmer	Rural	Natural	Pit/others	Yes	Nurse	CHC	Yes	5	7	Yes	Yes	Yes	No	3	Yes	No	MCHAide	CHC	1	Born alive	Normal	Yes	1hrs	MCHAide	Yes	2	TBA	Patient Home
398	Foindu	4	Marwei	Peje West	Always	20	19	No	None	Christian	Mende	2	2	2	Married	Farmer	>60	None	Farmer	Rural	Natural	Pit/others	Yes	Nurse	CHC	Yes	3	5	Yes	No	Yes	No	2	Yes	No	MCHAide	CHC	3	Born alive	Normal	Yes	1hrs	MCHAide	Yes	6hrs	TBA	Patient Home
399	Foindu	4	Marwei	Peje West	3	39	38	Yes	Junior Secondary	Islam	Mende	4	4	2	Married	CHW	>60	Vocational	Teacher	Rural	Natural	Pit/others	Yes	Nurse	CHC	Yes	2	10	Yes	Yes	Yes	No	3	Yes	No	MCHAide	chc	1	Born alive	Normal	Yes	1hrs	MCHAide	Yes	8hrs	TBA	Patient Home
400	Foindu	4	Marwei	Peje Bongre	3	20	19	No	None	Islam	Mende	2	2	2	Living together	Farmer	>60	Junior Secondary	Farmer	Rural	Natural	Pit/others	Yes	Nurse	CHC	Yes	3	10	Yes	No	Yes	No	2	Yes	No	TBA	CHC	7	Born alive	Normal	Yes	1hrs	MCHAide	Yes	4hrs	MCHAide	Patient Home
401	Foindu	4	Marwei	Peje Bongre	10	19	18	Yes	Primary	Islam	Mende	1	1	1	Married	Farmer	>60	Senior Secondary	Bike rider	Rural	Natural	Pit/others	Yes	Nurse	CHC	Yes	3	11	Yes	No	Yes	No	3	Yes	No	MCHAide	CHC	2	Born alive	Normal	Yes	1hrs	MCHAide	Yes	1	CHW	Patient Home
402	Foindu	4	Marwei	Peje Bongre	6	40	39	No	None	Islam	Mende	6	6	1	Married	Farmer	>60	None	Farmer	Rural	Modern	Pit/others	Yes	Nurse	CHP	Yes	3	8	Yes	No	Yes	No	2	Yes	No	MCHAide	CHP	2	Born alive	Normal	Yes	8hrs	MCHAide	Yes	3	MCHAide	Patient Home
403	Foindu	4	Marwei	Peje Bongre	6	30	29	No	None	Islam	Mende	3	3	1	Married	Farmer	>60	None	Farmer	Rural	Natural	Pit/others	Yes	Nurse	CHC	Yes	3	15	Yes	Yes	Yes	No	2	Yes	No	MCHAide	CHC	2	Born alive	Normal	Yes	1hrs	MCHAide	Yes	2hrs	TBA	Patient Home
404	Foindu	4	Marwei	Peje Bongre	2	23	22	No	None	Islam	Mende	2	2	2	Living together	farmer	>60	Primary	Farmer	Rural	Natural	Pit/others	Yes	Midwife	CHc	Yes	4	Don’t know	Yes	No	Yes	No	Don’t Know	Yes	Yes	Midwife	CHC	2	Born alive	Normal	Yes	7hrs	Midwife	Yes	1	TBA	Patient Home
405	Lelema	1	Borkou	Peje Bongre	6	34	33	No	None	Islam	Mende	4	4	2	Married	Farmer	30-60	None	Farmer	Rural	Natural	Pit/others	Yes	Midwife	CHC	Yes	3	9	Yes	No	Yes	No	3	Yes	Yes	Midwife	CHC	7	Born alive	Normal	Yes	1hrs	MCHAide	N0	0	0	0
406	Lelema	1	Borkou	Peje Bongre	3	22	20	No	None	Islam	Mende	2	2	2	Living together	Farmer	30-60	None	Farmer	Rural	Natural	Pit/others	Yes	Nurse	CHC	Yes	3	6	Yes	No	Yes	No	3	Yes	No	MCHAide	CHC	2	Born alive	Normal	Yes	1hrs	MCHAide	N0	0	0	0
407	Malema	1	Borkou	Peje Bongre	Always	20	18	Yes	Primary	Islam	Mende	1	1	1	Single	Farmer	<30	No	No	Rural	Natural	Pit/others	Yes	Nurse	CHC	Yes	4	5	Yes	Yes	Yes	No	3	Yes	No	MCHAide	CHC	5	Born alive	Normal	Yes	2hrs	MCHAide	Yes	3hrs	CHW	Patient Home
408	Malema	1	Borkou	Peje Bongre	10	31	30	No	None	Christian	Mende	3	3	1	Married	Farmer	<30	None	Farmer	Rural	Modern	Pit/others	Yes	MIdwife	CHC	Yes	3	7	Yes	Yes	Yes	No	3	Yes	Yes	MIdwife	CHC	1	Born alive	Normal	Yes	2hrs	Midwife	Yes	1	TBA	Patient Home
409	Malema	1	Borkou	Peje West	15	22	20	Yes	Junior Secondary	Islam	Mende	3	3	2	Separated	Hairdress	<30	No	No	Rural	Natural	Pit/others	Yes	Nurse	CHC	Yes	3	11	Yes	Yes	Yes	No	3	Yes	No	MCHAide	CHC	2	Born alive	Normal	Yes	1hrs	MCHAide	Yes	8hrs	CHW	Patient Home
410	Malema	1	Borkou	Peje Bongre	6	26	24	Yes	Junior Secondary	Islam	Mende	2	2	2	Separated	Farmer	<30	No	No	Rural	Natural	Pit/others	Yes	Nurse	CHC	Yes	4	4	Yes	No	Yes	No	3	Yes	No	MCHAide	CHC	3	Born alive	Normal	Yes	1hrs	MCHAide	Yes	1hrs	TBA	Patient Home
411	Malema	1	Borkou	Peje Bongre	14	35	34	No	None	Christian	Mende	3	3	2	Married	Farmer	<30	Primary	Farmer	Rural	Natural	Pit/others	Yes	Midwife	CHC	Yes	4	8	Yes	No	Yes	No	3	Yes	Yes	Midwife	CHC	2	Born alive	Normal	Yes	1hrs	MIdwife	Yes	2	TBA	Patient Home
412	Malema	1	Borkou	Peje Bongre	10	20	19	Yes	Primary	Christian	Mende	2	2	2	Married	Trader	<30	Junior Secondary	Farmer	Rural	Natural	Pit/others	Yes	Midwife	CHC	Yes	4	5	Yes	Yes	Yes	No	3	Yes	Yes	Midwife	CHC	2	Born alive	Normal	Yes	1hrs	Midwife	Yes	8hrs	TBA	Patient Home
413	Semabu	1	Borkou	Peje Bongre	3	37	36	No	None	Islam	Mende	6	6	2	Living together	Farmer	30-60	None	Farmer	Rural	Natural	Pit/others	Yes	Nurse	CHP	Yes	3	8	Yes	Yes	Yes	Yes	3	Yes	No	MCHAide	CHP	3	Born alive	Normal	Yes	1hrs	MCHAide	Yes	3	MCHAide	Patient Home
414	Semabu	1	Borkou	Peje Bongre	15	37	35	No	None	Islam	Mende	6	6	1	Married	Farmer	30-60	None	Farmer	Rural	Natural	Pit/others	Yes	Nurse	CHP	Yes	2	9	Yes	Yes	Yes	Yes	3	Yes	No	MCHAide	CHC	3	Born alive	Normal	Yes	2hrs	MCHAide	Yes	3	MCHAide	Patient Home
415	Ngokolu	2	Gboo	Njaluahun	3	19	18	Yes	Senior Secondary	Christian	Mende	1	1	1	Single	Trader	30-60	No	No	Rural	Natural	Pit/others	Yes	Midwife	Private	Yes	3	12	Yes	Yes	Yes	Yes	1	Yes	Yes	Midwife	Private	7	Born alive	Assisted	Yes	1hrs	Midwife	Yes	3	Midwife	Patient Home
416	Ngokolu	2	Gboo	Njaluahun	10	22	20	Yes	Junior Secondary	Islam	Mende	3	3	1	Married	Farmer	<30	None	Farmer	Rural	Modern	Pit/others	Yes	Nurse	CHP	Yes	3	6	Yes	Yes	Yes	Yes	2	Yes	No	MCHAide	CHP	3	Born alive	Normal	Yes	2hrs	Midwife	Yes	3	CHW	Patient Home
417	Ngokolu	2	Gboo	Njaluahun	20	35	34	Yes	Primary	Islam	Mende	7	7	2	Married	Farmer	30-60	Primary	Farmer	Rural	Modern	Pit/others	Yes	Nurse	CHP	Yes	4	10	Yes	Yes	Yes	Yes	1	Yes	No	MCHAide	CHP	3	Born alive	Normal	Yes	3hrs	MCHAide	Yes	3	Relative	Patient Home
418	Walima	2	Gboo	Njaluahun	5	30	29	No	None	Islam	Mende	4	4	2	Married	Farmer	<30	Junior Secondary	Bike rider	Rural	Modern	Pit/others	Yes	Nurse	CHP	Yes	2	5	Yes	Yes	Yes	Yes	4	Yes	No	MCHAide	CHP	3	Born alive	Normal	Yes	2hrs	MCHAide	Yes	4	Relative	Patient Home
419	Daru Junction	2	Gboo	Njaluahun	5	35	34	Yes	Primary	Christian	Mende	2	2	1	Married	Farmer	30-60	Junior Secondary	Farmer	Rural	Modern	Pit/others	Yes	Nurse	CHP	Yes	3	5	Yes	Yes	Yes	Yes	2	Yes	Yes	MIdwife	Private	4	Born alive	Normal	Yes	1hrs	MCHAide	Yes	3	CHW	Patient Home
420	Daru Junction	2	Gboo	Njaluahun	8	24	23	Yes	Junior Secondary	Islam	Mende	3	3	2	Married	Trader	30-60	Senior Secondary	Trader	Rural	Natural	Pit/others	Yes	Nurse	CHP	Yes	2	8	Yes	Yes	Yes	Yes	3	Yes	No	MCHAide	CHP	3	Born alive	Normal	Yes	1hrs	MCHAide	Yes	4	CHW	Patient Home
421	Daru Junction	2	Gboo	Njaluahun	5	20	19	Yes	Primary	Christian	Mende	2	2	2	Married	Farmer	30-60	Senior Secondary	Trader	Rural	Natural	Pit/others	Yes	Nurse	CHP	Yes	2	5	Yes	Yes	Yes	Yes	2	Yes	No	MChAide	CHC	7	Born alive	Normal	Yes	1hrs	MCHAide	Yes	3	TBA	Patient Home
422	Daru Junction	2	Gboo	Njaluahun	7	20	19	Yes	Senior Secondary	Islam	Mende	1	1	1	Single	Student	30-60	No	No	Rural	Natural	Pit/others	Yes	Nurse	CHP	Yes	3	4	Yes	No	No	Yes	2	Yes	No	MCHAide	CHP	3	Born alive	Normal	Yes	1hrs	MCHAide	Yes	4hrs	TBA	Patient Home
423	Walima	2	Gboo	Njaluahun	4	27	26	Yes	Senior Secondary	Islam	Mende	1	1	1	Married	Trader	30-60	Primary	Farmer	Rural	Modern	Pit/others	Yes	Nurse	Private	Yes	3	6	Yes	Yes	Yes	Yes	2	Yes	Yes	Doctor	Private	8	Born alive	CS	Yes	1hrs	Midwife	Yes	3	Midwife	Patient Home
424	Walima	2	Gboo	Njaluahun	Always	23	22	Yes	Senior Secondary	Islam	Mende	2	2	1	Married	Farmer	30-60	Junior Secondary	Farmer	Rural	Modern	Pit/others	Yes	Nurse	CHP	Yes	2	7	Yes	Yes	Yes	Yes	2	Yes	No	MCHAide	CHP	3	Born alive	Normal	Yes	1hrs	Midwife	Yes	3	TBA	Patient Home
425	Salon Buima	5	Jonga	Njaluahun	Always	33	31	No	None	Islam	Mende	4	4	2	Married	Farmer	>60	None	Farmer	Rural	Natural	Pit/others	Yes	Nurse	MCHP	Yes	3	6	Yes	Yes	Yes	Yes	1	Yes	No	MCHAide	MCHP	3	Born alive	Normal	Yes	2hrs	MCHAide	Yes	3	CHW	Patient Home
426	Njala	5	Jonga	Njaluahun	Always	25	24	Yes	Junior Secondary	Islam	Mende	2	2	2	Married	Trader	>60	Senior Secondary	Farmer	Rural	Natural	Pit/others	Yes	MCHAide	MCHP	Yes	3	8	Yes	Yes	Yes	Yes	3	Yes	No	MCHAide	MCHP	3	Born alive	Normal	Yes	3hrs	MCHAide	Yes	4	TBA	Patient Home
427	Godie	5	Jonga	Njaluahun	3	22	21	Yes	Junior Secondary	Islam	Mende	2	2	2	Married	Farmer	>60	Junior Secondary	Farmer	Rural	Modern	Pit/others	Yes	Nurse	MCHP	Yes	4	6	Yes	Yes	Yes	Yes	2	Yes	No	MCHAide	MCHP	3	Born alive	Normal	Yes	2hrs	MCHAide	Yes	3	TBA	Patient Home
428	Salon Buima	5	Jonga	Njaluahun	5	20	19	Yes	Primary	Islam	Mende	1	1	1	Married	Farmer	>60	Senior Secondary	Farmer	Rural	Modern	Pit/others	Yes	Nurse	MCHP	Yes	3	6	Yes	Yes	Yes	Yes	Don’t Know	Yes	No	MCHAide	MCHP	3	Born alive	Normal	Yes	2hrs	MCHAide	Yes	4	CHW	Patient Home
429	Garama	5	Jonga	Njaluahun	7	22	20	Yes	Junior Secondary	Christian	Mende	3	3	2	Married	Farmer	>60	Primary	Farmer	Rural	Natural	Pit/others	Yes	Nurse	CHP	Yes	3	6	Yes	Yes	Yes	Yes	2	Yes	No	MCHAide	MCHP	3	Born alive	Normal	Yes	1hrs	MCHAide	Yes	3	MCHAide	Patient Home
430	Samibu	5	Jonga	Njaluahun	10	32	32	No	None	Islam	Mende	5	5	1	Married	Farmer	>60	None	Farmer	Rural	Natural	Pit/others	Yes	Nurse	CHP	Yes	3	3	Yes	Yes	Yes	Yes	3	Yes	No	MCHAide	CHP	7	Born alive	Normal	Yes	2hrs	MCHAide	Yes	4	TBA	Patient Home
431	Mendama	5	Jonga	Njaluahun	6	27	26	Yes	Junior Secondary	Christian	Mende	2	2	1	Married	Farmer	>60	None	Farmer	Rural	Natural	Pit/others	Yes	Nurse	CHP	Yes	2	7	Yes	Yes	Yes	Yes	3	Yes	No	MCHAide	CHP	3	Born alive	Normal	Yes	1hrs	MCHAide	Yes	3	TBA	Patient Home
432	Njala	5	Jonga	Njaluahun	10	28	26	No	None	Islam	Mende	2	3	2	Married	Farmer	>60	None	Farmer	Rural	Natural	Pit/others	Yes	Nurse	MCHP	Yes	3	5	Yes	Yes	Yes	Yes	2	Yes	No	MCHAide	MCHP	3	Born alive	Normal	Yes	2hrs	MCHAide	Yes	5hrs	TBA	Patient Home
433	Godie	5	Jonga	Njaluahun	Always	25	25	Yes	Junior Secondary	Islam	Mende	3	3	2	Married	Farmer	>60	Primary	Farmer	Rural	Natural	Pit/others	Yes	Nurse	MCHP	Yes	3	5	Yes	Yes	Yes	Yes	2	Yes	No	MCHAide	MCHP	3	Born alive	Normal	Yes	2hrs	MCHAide	Yes	3	CHW	Patient Home
434	Njala	5	Jonga	Njaluahun	2	22	22	Yes	Senior Secondary	Islam	Mende	2	2	1	Married	Farmer	>60	Senior Secondary	Farmer	Rural	Natural	Pit/others	Yes	Nurse	MCHP	Yes	4	3	Yes	Yes	Yes	Yes	2	Yes	No	MCHAide	MCHP	3	Born alive	Normal	Yes	1hrs	MCHAide	Yes	4	CHW	Patient Home
435	Mendama	5	Jonga	Njaluahun	7	30	29	No	None	Christian	Mende	2	2	2	Married	Farmer	>60	None	Farmer	Rural	Natural	Pit/others	Yes	Nurse	CHP	Yes	3	5	Yes	Yes	Yes	Yes	1	Yes	No	MCHAide	CHP	3	Born alive	Normal	Yes	1hrs	Nurse	Yes	8hrs	CHW	Patient Home
436	Teyama	7	Kargbu	Njaluahun	Always	37	35	Yes	Primary	Islam	Mende	4	4	1	Married	Tailor	<30	Junior Secondary	Miner	Urban	Natural	Pit/others	Yes	Nurse	CHC	Yes	4	6	Yes	No	Yes	Yes	3	Yes	Yes	Midwife	Private	3	Born alive	Normal	Yes	1hrs	Midwife	Yes	1	Midwife	Patient Home
437	Teyama	7	Kargbu	Njaluahun	10	30	28	Yes	Primary	Islam	Mende	4	4	2	Married	Trader	<30	Higher	Teacher	Urban	Natural	Pit/others	Yes	Nurse	CHC	Yes	2	6	Yes	Yes	Yes	Yes	3	Yes	Yes	Midwife	CHC	3	Born alive	Normal	Yes	2hrs	Midwife	Yes	3	Midwife	Patient Home
438	Teyama	7	Kargbu	Njaluahun	10	30	28	Yes	Primary	Islam	Mende	3	3	1	Married	Trader	>60	Higher	Teacher	Urban	Natural	Pit/others	Yes	Nurse	CHC	Yes	4	6	Yes	Yes	Yes	Yes	2	Yes	Yes	Midwife	CHC	2	Born alive	Normal	Yes	1hrs	Nurse	N0	0	0	0
439	Teyama	7	Kargbu	Njaluahun	Always	30	20	Yes	Primary	Christian	Mende	4	4	2	Married	Farmer	30-60	Junior Secondary	Farmer	Urban	Natural	Pit/others	Yes	Nurse	CHC	Yes	3	6	Yes	No	Yes	Yes	3	Yes	Yes	Midwife	CHC	3	Born alive	Normal	Yes	1hrs	Nurse	N0	0	0	0
440	Teyama	7	Kargbu	Njaluahun	5	35	33	Yes	Junior Secondary	Islam	Mende	4	4	2	Married	Farmer	<30	Higher	Police office	Urban	Natural	Pit/others	Yes	Nurse	CHC	Yes	3	6	Yes	Yes	Yes	Yes	3	Yes	Yes	Midwife	CHC	3	Born alive	Normal	Yes	1hrs	Midwife	Yes	3	Nurse	Patient Home
441	Teyama	7	Kargbu	Njaluahun	10	30	28	Yes	Primary	Christian	Mende	4	4	2	Married	Farmer	<30	Junior Secondary	Farmer	Urban	Natural	Pit/others	Yes	Nurse	CHC	Yes	3	5	Yes	Yes	Yes	Yes	3	Yes	Yes	Midwife	CHC	3	Born alive	Normal	Yes	2hrs	Midwife	N0	0	0	0
442	Teyama	7	Kargbu	Njaluahun	11	30	28	No	None	Islam	Mende	3	3	1	Married	Housewife	30-60	None	Farmer	Urban	Natural	Pit/others	Yes	Nurse	CHC	Yes	3	5	Yes	Yes	Yes	Yes	3	Yes	Yes	Midwife	CHC	2	Born alive	Normal	Yes	2hrs	Midwife	N0	0	0	0
443	Teyama	7	Kargbu	Njaluahun	Always	38	36	No	None	Islam	Mende	4	4	1	Married	Trader	30-60	Junior Secondary	Farmer	Urban	Natural	Pit/others	Yes	Nurse	Private	Yes	5	5	Yes	Yes	Yes	Yes	3	Yes	Yes	Midwife	Private	2	Born alive	Normal	Yes	1hrs	Midwife	Yes	1	Nurse	Patient Home
444	Teyama	7	Kargbu	Njaluahun	3	20	18	Yes	Senior Secondary	Christian	Mende	1	1	1	Single	Trader	30-60	No	No	Urban	Natural	Pit/others	Yes	Nurse	CHC	Yes	3	6	Yes	Yes	Yes	Yes	3	Yes	Yes	Midwife	Private	2	Born alive	Normal	Yes	2hrs	Midwife	N0	0	0	0
445	Teyama	7	Kargbu	Njaluahun	Always	30	28	No	None	Islam	Mende	5	5	1	Married	Farmer	30-60	Primary	Farmer	Urban	Natural	Pit/others	Yes	Nurse	Private	Yes	2	6	Yes	Yes	Yes	Yes	3	Yes	Yes	Midwife	Private	3	Born alive	Normal	Yes	2hrs	Nurse	N0	0	0	0
446	Hanjama	6	Keimaya	Njaluahun	Always	20	16	No	None	Christian	Mende	2	2	2	Married	Farmer	30-60	None	Farmer	Rural	Natural	Pit/others	Yes	Nurse	CHP	Yes	2	6	Yes	Yes	Yes	Yes	2	Yes	No	MCHAide	CHP	3	Born alive	Normal	Yes	2hrs	MCHAide	N0	0	0	0
447	Tongoru	6	Keimaya	Njaluahun	10	26	24	No	None	Islam	Mende	3	3	3	Married	Farmer	30-60	Junior Secondary	Farmer	Rural	Natural	Pit/others	Yes	Nurse	CHP	Yes	2	6	Yes	Yes	Yes	Yes	3	Yes	No	MCHAide	CHP	3	Born alive	Normal	Yes	2hrs	MCHAide	Yes	3	MCHAide	Patient Home
448	Tongoru	6	Keimaya	Njaluahun	5	28	26	No	None	Islam	Mende	4	4	1	Married	Farmer	30-60	None	Farmer	Rural	Natural	Pit/others	Yes	Nurse	CHP	Yes	3	6	Yes	No	Yes	Yes	2	Yes	No	MCHAide	CHP	3	Born alive	Normal	Yes	2hrs	MCHAide	Yes	4	MCHAide	Patient Home
449	Hanjama	6	Keimaya	Njaluahun	Always	20	18	No	None	Islam	Mende	1	1	1	Married	Farmer	30-60	None	Farmer	Rural	Natural	Pit/others	Yes	Nurse	CHP	Yes	3	5	Yes	Yes	Yes	Yes	2	Yes	No	MCHAide	CHP	3	Born alive	Normal	Yes	3hrs	MCHAide	N0	0	0	0
450	Hanjama	6	Keimaya	Njaluahun	Always	20	18	Yes	Primary	Islam	Mende	1	1	1	Married	Farmer	30-60	None	Farmer	Rural	Natural	Pit/others	Yes	Nurse	CHP	Yes	3	6	No	No	Yes	Yes	3	Yes	No	MCHAide	CHC	3	Born alive	Normal	Yes	1hrs	MCHAide	Yes	4	MCHAide	Patient Home
451	Sasahun	6	Keimaya	Njaluahun	10	30	28	No	None	Islam	Mende	5	5	1	Married	Farmer	<30	Senior Secondary	Farmer	Rural	Natural	Pit/others	Yes	Nurse	CHP	Yes	2	5	Yes	Yes	Yes	Yes	3	Yes	No	MCHAide	CHP	3	Born alive	Normal	Yes	2hrs	MCHAide	Yes	2	MCHAide	Patient Home
452	Sasahun	6	Keimaya	Njaluahun	5	20	18	No	None	Islam	Mende	1	1	1	Single	Farmer	>60	None	Farmer	Rural	Natural	Pit/others	Yes	Nurse	CHP	Yes	2	5	Yes	Yes	Yes	Yes	3	Yes	Yes	Midwife	CHP	3	Born alive	Normal	Yes	3hrs	MChAide	Yes	3	MCHAide	Patient Home
453	Mamboma	6	Keimaya	Njaluahun	Always	30	28	Yes	Junior Secondary	Islam	Mende	3	3	2	Married	Farmer	<30	None	Farmer	Rural	Natural	Pit/others	Yes	Nurse	MCHP	Yes	2	4	Yes	Yes	Yes	Yes	3	Yes	No	MCHAide	MCHP	3	Born alive	Normal	Yes	2	MCHAide	N0	0	0	0
454	Mamboma	6	Keimaya	Njaluahun	Always	25	23	Yes	Junior Secondary	Islam	Mende	3	3	1	Married	Farmer	>60	None	Farmer	Rural	Natural	Pit/others	Yes	Nurse	MCHP	Yes	2	5	Yes	Yes	Yes	Yes	3	Yes	No	MCHAide	MCHP	3	Born alive	Normal	Yes	1hrs	MCHAide	Yes	3	TBA	Patient Home
455	Mamboma	6	Keimaya	Njaluahun	Always	23	21	No	None	Islam	Mende	2	2	2	Married	Farmer	>60	None	Farmer	Rural	Natural	Pit/others	Yes	Nurse	CHC	Yes	4	6	Yes	Yes	Yes	Yes	3	Yes	Yes	Midwife	CHC	3	Born alive	Normal	Yes	1hrs	Midwife	N0	0	0	0
456	Daru	3	Sowa	Jawei	2	22	22	Yes	Senior Secondary	Christian	Mende	2	2	2	Married	Housewife	30-60	Senior Secondary	Bike rider	Urban	Natural	Pit/others	Yes	Midwife	CHC	Yes	4	7	Yes	Yes	Yes	Yes	3	Yes	Yes	Midwife	CHC	3	Born alive	Normal	Yes	1hrs	Midwife	Yes	2	Nurse	Patient Home
457	Daru	3	Sowa	Jawei	Always	20	20	Yes	Senior Secondary	Islam	Mende	2	2	1	Single	Student	30-60	Senior Secondary	Finance Office	Urban	Modern	Pit/others	Yes	Nurse	CHC	Yes	3	4	Yes	Yes	Yes	Yes	2	Yes	Yes	Midwife	CHC	3	Born alive	Normal	Yes	1hrs	TBA	Yes	2	TBA	Patient Home
458	Daru	3	Sowa	Jawei	4	23	23	Yes	Senior Secondary	Islam	Mende	2	2	1	Separated	Student	<30	No	No	Urban	Natural	Pit/others	Yes	Nurse	CHC	Yes	5	3	Yes	Yes	Yes	Yes	2	Yes	Yes	Midwife	CHC	3	Born alive	Normal	Yes	1hrs	Midwife	Yes	2	TBA	Patient Home
459	Daru	3	Sowa	Jawei	3	20	20	Yes	Senior Secondary	Christian	Mende	1	1	1	Single	Student	30-60	No	No	Urban	Natural	Pit/others	Yes	Midwife	CHC	Yes	4	6	Yes	Yes	Yes	Yes	2	Yes	No	MCHAide	CHC	3	Born alive	Normal	Yes	1hrs	MCHAide	Yes	3	MCHAide	Patient Home
460	Daru	3	Sowa	Jawei	Always	15	15	Yes	Junior Secondary	Islam	Mende	1	1	1	Single	Student	30-60	No	No	Urban	Modern	Pit/others	Yes	Nurse	CHC	Yes	4	3	Yes	Yes	Yes	Yes	2	Yes	Yes	Midwife	CHC	1	Born alive	Normal	Yes	1hrs	Nurse	Yes	3	TBA	Patient Home
461	Daru	3	Sowa	Jawei	Always	24	23	No	None	Islam	Mende	2	2	1	Married	Housewife	<30	Higher	Manger	Urban	Modern	Flush	Yes	Midwife	CHC	Yes	4	5	Yes	Yes	Yes	Yes	2	Yes	No	MCHAide	CHC	3	Born alive	Normal	Yes	1hrs	MCHAide	N0	0	0	0
462	Daru	3	Sowa	Jawei	1	25	25	Yes	Senior Secondary	Christian	Mende	1	1	1	Single	Student	30-60	No	No	Urban	Natural	Pit/others	Yes	Midwife	CHC	Yes	4	7	Yes	Yes	Yes	Yes	3	Yes	Yes	Midwife	CHC	3	Born alive	Normal	Yes	1hrs	Midwife	Yes	7	Nurse	Patient Home
463	Daru	3	Sowa	Jawei	1	22	22	Yes	Primary	Christian	Mende	1	1	1	Widow	Housewife	30-60	No	No	Urban	Natural	Pit/others	Yes	Midwife	CHC	Yes	3	5	Yes	Yes	Yes	Yes	2	Yes	Yes	Midwife	Hospital	1	Born alive	Normal	Yes	1hrs	Midwife	N0	0	0	0
464	Daru	3	Sowa	Jawei	19	36	36	Yes	Primary	Christian	Fullah	5	7	2	Living together	Trader	>60	Junior Secondary	Trader	Urban	Natural	Pit/others	Yes	Nurse	CHC	Yes	Don’t know	3	Yes	Yes	Yes	Yes	2	Yes	Yes	Midwife	CHC	2	Born alive	Normal	Yes	2hrs	Midwife	N0	0	0	0
465	Daru	3	Sowa	Jawei	Always	25	25	No	None	Islam	Mende	3	3	2	Divorced	Trader	30-60	No	No	Urban	Modern	Flush	Yes	Midwife	CHC	Yes	4	3	Yes	Yes	Yes	Yes	3	Yes	Yes	Midwife	CHC	3	Born alive	Normal	Yes	2hrs	Midwife	Yes	3	Midwife	Patient Home
466	Joporwahun	2	Bambara	Upper Bambara	9	35	34	No	None	Islam	Mende	3	4	1	Married	Farmer	>60	None	Farmer	Rural	Natural	Pit/others	Yes	Nurse	CHC	Yes	7	5	Yes	Yes	Yes	No	3	Yes	Yes	Midwife	CHC	3	Born alive	Normal	Yes	1hrs	Midwife	Yes	1hrs	CHW	Patient Home
467	Joporwahun	2	Bambara	Upper Bambara	7	28	27	No	None	Islam	Mende	2	4	2	Married	Farmer	>60	None	Farmer	Rural	Natural	Pit/others	Yes	Nurse	CHC	Yes	2	8	Yes	Yes	Yes	No	3	Yes	Yes	Midwife	CHC	3	Born alive	Normal	Yes	1hrs	Midwife	Yes	1hrs	CHW	Patient Home
468	Joporwahun	2	Bambara	Upper Bambara	5	19	18	Yes	Junior Secondary	Christian	Mende	1	1	1	Living together	Farmer	>60	Junior Secondary	Farmer	Rural	Natural	Pit/others	Yes	Nurse	CHP	Yes	3	4	Yes	Yes	Yes	Yes	3	Yes	No	Nurse	CHP	2	Born alive	Normal	Yes	1hrs	Nurse	Yes	1	Nurse	Patient Home
469	Joporwahun	2	Bambara	Upper Bambara	5	30	29	No	None	Islam	Gbandi	5	8	3	Married	Trader	>60	Junior Secondary	Maison	Rural	Modern	Pit/others	Yes	Nurse	CHC	Yes	Don’t know	4	Yes	Yes	Yes	No	3	Yes	Yes	Midwife	Private	3	Born alive	Normal	Yes	1hrs	Midwife	Yes	1hrs	CHW	Patient Home
470	Joporwahun	2	Bambara	Upper Bambara	Always	20	19	No	None	Islam	Mende	2	2	2	Married	Farmer	>60	Higher	Teacher	Rural	Natural	Pit/others	Yes	Nurse	MCHP	Yes	5	8	Yes	Yes	Yes	No	4	Yes	Yes	Midwife	Private	2	Born alive	Normal	Yes	1hrs	Midwife	Yes	3hrs	TBA	Patient Home
471	Joporwahun	2	Bambara	Upper Bambara	6	30	29	No	None	Islam	Mende	4	5	1	Married	Farmer	>60	Primary	Farmer	Rural	Natural	Pit/others	Yes	Nurse	CHC	Yes	3	7	Yes	Yes	Yes	No	3	Yes	Yes	Midwife	CHC	3	Born alive	Normal	Yes	1hrs	MIdwife	Yes	1hrs	CHW	Patient Home
472	Joporwahun	2	Bambara	Upper Bambara	Always	20	19	Yes	Senior Secondary	Islam	Mende	2	2	1	Married	Farmer	>60	Senior Secondary	Student	Rural	Modern	Pit/others	Yes	Nurse	CHC	Yes	5	5	Yes	Yes	Yes	No	3	Yes	Yes	Midwife	CHC	4	Born alive	Normal	Yes	2hrs	Midwife	Yes	2hrs	Midwife	Patient Home
473	Joporwahun	2	Bambara	Upper Bambara	1	25	24	Yes	Junior Secondary	Islam	Mende	4	4	2	Married	Trader	>60	Primary	Farmer	Rural	Natural	Pit/others	Yes	Nurse	CHC	Yes	3	7	Yes	Yes	Yes	No	2	Yes	Yes	Midwife	CHC	3	Born alive	Normal	Yes	1hrs	Midwife	Yes	1hrs	CHW	Patient Home
474	Joporwahun	2	Bambara	Upper Bambara	10	26	25	Yes	Junior Secondary	Islam	Mende	2	3	2	Married	Farmer	>60	Junior Secondary	Farmer	Rural	Natural	Pit/others	Yes	Nurse	CHC	Yes	4	6	Yes	Yes	Yes	No	4	Yes	Yes	Midwife	CHC	3	Born alive	Normal	Yes	1hrs	Midwife	Yes	1hrs	CHW	Patient Home
475	Joporwahun	2	Bambara	Upper Bambara	6	40	39	No	None	Islam	Mende	7	7	2	Married	Farmer	>60	None	Farmer	Rural	Natural	Pit/others	Yes	Nurse	CHC	hrs	5	4	Yes	Yes	Yes	No	2	Yes	Yes	MIdwife	CHC	3	Born alive	Normal	Yes	1hrs	Midwife	Yes	1hrs	CHW	Patient Home
476	Jaama	1	Golu	Upper Bambara	Always	30	28	Yes	Senior Secondary	Islam	Mende	4	4	2	Married	Farmer	>60	Senior Secondary	Farmer	Rural	Modern	Pit/others	Yes	Nurse	CHC	Yes	4	8	Yes	Yes	Yes	No	2	Yes	No	TBA	Private	3	Born alive	Normal	Yes	1hrs	Nurse	Yes	2	Nurse	Patient Home
477	Jaama	1	Golu	Upper Bambara	1	19	18	Yes	Primary	Islam	Mende	2	2	2	Married	Farmer	>60	Junior Secondary	Farmer	Rural	Modern	Pit/others	Yes	Nurse	Hospital	Yes	3	11	Yes	Yes	Yes	No	4	Yes	Yes	Midwife	Hospital	5	Born alive	Normal	Yes	1hrs	Midwife	Yes	6hrs	Nurse	Patient Home
478	Jaama	1	Golu	Upper Bambara	Always	35	34	No	None	Islam	Mende	4	7	3	Married	Farmer	>60	Junior Secondary	Farmer	Rural	Natural	Pit/others	Yes	Nurse	CHC	Yes	4	9	Yes	Yes	Yes	No	3	Yes	Yes	Midwife	CHC	3	Born alive	Normal	Yes	2hrs	Midwife	Yes	1	CHW	Patient Home
479	Tomboru	1	Golu	Upper Bambara	1	19	18	Yes	Junior Secondary	Islam	Mende	1	1	1	Married	Farmer	>60	Primary	Maison	Rural	Modern	Pit/others	Yes	Nurse	MCHP	Yes	5	10	Yes	Yes	Yes	No	5	Yes	Yes	MIdwife	Faithbased Hosp	7	Born alive	Normal	Yes	1hrs	Midwife	Yes	7	Nurse	Patient Home
480	Tomboru	1	Golu	Upper Bambara	Always	32	30	No	None	Islam	Mende	2	2	1	Widow	Farmer	>60	No	No	Rural	Natural	Pit/others	Yes	Nurse	MCHP	Yes	3	8	Yes	Yes	Yes	No	3	Yes	Yes	Midwife	CHC	3	Born alive	Normal	Yes	1hrs	MCHAide	Yes	1hrs	CHW	Patient Home
481	Tomboru	1	Golu	Upper Bambara	8	28	27	Yes	Junior Secondary	Islam	Mende	2	5	1	Married	Farmer	>60	Primary	Farmer	Rural	Natural	Pit/others	Yes	Nurse	MCHP	Yes	3	10	Yes	No	Yes	No	5	Yes	No	MCHAide	MCHP	3	Born alive	Normal	Yes	2hrs	MCHAide	Yes	3	CHW	Patient Home
482	Tomboru	1	Golu	Upper Bambara	14	30	29	No	None	Islam	Mende	3	4	1	Married	Farmer	>60	None	Farmer	Rural	Modern	Pit/others	Yes	Nurse	CHC	Yes	3	6	Yes	Yes	Yes	No	4	Yes	No	MCHAide	MCHP	3	Born alive	Normal	Yes	1hrs	MCHAide	Yes	2hrs	CHW	Patient Home
483	Tomboru	1	Golu	Upper Bambara	6	27	26	Yes	Primary	Islam	Mende	2	2	2	Married	Farmer	>60	Primary	Farmer	Rural	Natural	Pit/others	Yes	Nurse	MCHP	Yes	2	7	Yes	Yes	Yes	No	4	Yes	No	MCHAide	MCHP	3	Born alive	Normal	Yes	1hrs	MCHAide	Yes	1hrs	CHW	Patient Home
484	Tomboru	1	Golu	Upper Bambara	9	30	30	Yes	Primary	Islam	Mende	7	7	3	Married	Farmer	>60	Primary	Farmer	Rural	Modern	Pit/others	Yes	Midwife	CHC	Yes	3	8	Yes	No	Yes	No	3	Yes	Yes	MIdwife	CHC	3	Born alive	Normal	Yes	2hrs	MIdwife	Yes	2	Nurse	Patient Home
485	Tomboru	1	Golu	Upper Bambara	Always	24	23	Yes	Junior Secondary	Islam	Mende	2	2	1	Married	Farmer	>60	Senior Secondary	Farmer	Rural	Modern	Pit/others	Yes	Nurse	CHC	Yes	7	5	Yes	Yes	Yes	No	4	Yes	No	TBA	CHC	3	Born alive	Normal	Yes	1hrs	Midwife	Yes	3	Nurse	Patient Home
486	Pendembu	17	Naiahun	Upper Bambara	8	18	18	Yes	Senior Secondary	Islam	Mende	1	1	1	Married	Student	<30	Senior Secondary	Student	Urban	Natural	Pit/others	Yes	Nurse	Hospital	Yes	2	10	Yes	Yes	Yes	Yes	3	Yes	No	MCHAide	CHC	3	Born alive	Normal	Yes	1hrs	MCHAide	Yes	4	Nurse	Patient Home
487	Pendembu	17	Naiahun	Upper Bambara	5	30	30	No	None	Islam	Mende	3	3	3	Married	Trader	<30	Junior Secondary	Carpenter	Urban	Modern	Pit/others	Yes	Midwife	CHC	Yes	3	9	Yes	Yes	Yes	Yes	3	Yes	No	MCHAide	CHC	2	Born alive	Normal	Yes	1hrs	MCHAide	Yes	3	MCHAide	Patient Home
488	Pendembu	17	Naiahun	Upper Bambara	1	23	22	Yes	Junior Secondary	Islam	Mende	1	1	1	Married	Housewife	<30	Vocational	Teacher	Urban	Natural	Flush	Yes	Midwife	CHC	Yes	4	5	Yes	Yes	Yes	Yes	2	Yes	Yes	Midwife	Hospital	2	Born alive	Normal	Yes	1hrs	Midwife	Yes	7	Relative	Patient Home
489	Pendembu	17	Naiahun	Upper Bambara	2	22	20	Yes	Primary	Islam	Mende	3	3	2	Married	Farmer	<30	Primary	Farmer	Urban	Modern	Pit/others	Yes	Midwife	CHC	Yes	Don’t know	8	Yes	Yes	Yes	Yes	3	Yes	Yes	Midwife	CHC	3	Born alive	Normal	Yes	1hrs	Midwife	Yes	4	CHW	Patient Home
490	Pendembu	17	Naiahun	Upper Bambara	8	35	33	Yes	Primary	Islam	Mende	4	4	1	Married	Trader	30-60	Primary	Farmer	Urban	Modern	Pit/others	Yes	Nurse	CHC	Yes	4	10	Yes	Yes	Yes	Yes	3	Yes	Yes	Midwife	Private	1	Born alive	Normal	Yes	1hrs	Midwife	Yes	2	Nurse	Patient Home
491	Pendembu	17	Naiahun	Upper Bambara	4	20	19	Yes	Vocational	Islam	Mende	1	1	1	Living together	Teacher	30-60	Vocational	Teacher	Urban	Modern	Pit/others	Yes	Nurse	CHC	Yes	3	10	Yes	Yes	Yes	Yes	2	Yes	No	Midwife	CHC	2	Born alive	Normal	Yes	1hrs	MChAide	Yes	10hrs	MCHAide	Patient Home
492	Pendembu	17	Naiahun	Upper Bambara	10	37	35	Yes	Primary	Islam	Mende	6	6	2	Married	Trader	30-60	Primary	Trader	Urban	Modern	Pit/others	Yes	Nurse	Private	Yes	5	7	Yes	Yes	Yes	Yes	3	Yes	Yes	Midwife	Private	2	Born alive	Normal	Yes	1hrs	Midwife	N0	0	0	0
493	Pendembu	17	Naiahun	Upper Bambara	10	19	19	Yes	Senior Secondary	Christian	Mende	1	1	1	Single	Trader	30-60	No	No	Urban	Modern	Pit/others	Yes	Nurse	CHC	Yes	3	10	Yes	Yes	Yes	Yes	3	Yes	No	MCHAide	CHC	2	Born alive	Normal	Yes	1hrs	MCHAide	Yes	5hrs	MCHAide	Patient Home
494	Pendembu	17	Naiahun	Upper Bambara	2	19	19	Yes	Junior Secondary	Islam	Mende	1	1	1	Married	Student	<30	Senior Secondary	Bike rider	Urban	Modern	Pit/others	Yes	MCHAide	MCHP	Yes	3	9	Yes	Yes	Yes	Yes	3	Yes	Yes	Midwife	Hospital	1	Born alive	Assisted	Yes	1hrs	Midwife	N0	0	0	0
495	Pendembu	17	Naiahun	Upper Bambara	1	21	21	Yes	Junior Secondary	Islam	Mende	2	2	2	Married	Tailor	<30	Vocational	Teacher	Urban	Modern	Pit/others	Yes	Nurse	Private	Yes	3	10	Yes	Yes	Yes	Yes	2	Yes	No	TBA	Private	2	Born alive	Normal	Yes	1	TBA	N0	0	0	0
496	Bomaru	8	Guma	Upper Bambara	Always	25	25	Yes	Primary	Islam	Loma	4	6	2	Married	Farmer	<30	Junior Secondary	CHW	Urban	Natural	Pit/others	Yes	Nurse	CHP	Yes	4	8	Yes	Yes	Yes	Yes	3	Yes	No	MCHAide	CHP	3	Born alive	Normal	Yes	2hrs	MCHAide	Yes	4	MCHAide	Patient Home
497	Bomaru	8	Guma	Upper Bambara	Always	24	23	No	None	Islam	Mende	5	6	2	Married	Trader	<30	None	Maison	Urban	Modern	Pit/others	Yes	Nurse	CHP	Yes	3	8	Yes	Yes	Yes	Yes	3	Yes	No	MCHAide	CHP	3	Born alive	Normal	Yes	2hrs	MCHAide	Yes	1	MCHAide	Patient Home
498	Bomaru	8	Guma	Upper Bambara	5	27	27	No	None	Islam	Mende	5	6	2	Married	Farmer	30-60	None	Farmer	Urban	Natural	Pit/others	Yes	Nurse	CHP	Yes	3	8	Yes	Yes	Yes	Yes	3	Yes	No	MCHAide	CHP	4	Born alive	Normal	Yes	1hrs	Nurse	Yes	1	Midwife	Patient Home
499	Bomaru	8	Guma	Upper Bambara	Always	19	19	Yes	Junior Secondary	Islam	Mende	1	1	1	Living together	Student	<30	Primary	Farmer	Urban	Natural	Pit/others	Yes	Nurse	CHP	Yes	4	7	Yes	Yes	Yes	Yes	2	Yes	No	MCHAide	CHP	3	Born alive	Normal	Yes	1hrs	MCHAide	Yes	4	MCHAide	Patient Home
500	Bomaru	8	Guma	Upper Bambara	1	19	18	Yes	Junior Secondary	Islam	Mende	1	1	1	Living together	Student	<30	None	Maison	Urban	Modern	Pit/others	Yes	Nurse	Hospital	Yes	3	2	Yes	Yes	Yes	No	1	Yes	Yes	Midwife	Hospital	2	Born alive	Normal	Yes	1hrs	Nurse	N0	0	0	0
501	Bomaru	8	Guma	Upper Bambara	4	23	22	No	None	Islam	Mende	2	2	2	Married	Farmer	<30	None	Maison	Urban	Natural	Pit/others	Yes	Nurse	CHP	Yes	2	8	Yes	Yes	Yes	No	3	Yes	Yes	Midwife	Hospital	14	Born alive	Normal	Yes	1hrs	Midwife	Yes	4hrs	Nurse	Patient Home
502	Bomaru	8	Guma	Upper Bambara	1	19	18	Yes	Junior Secondary	Islam	Mende	1	1	1	Living together	Student	<30	None	Bike rider	Urban	Modern	Pit/others	Yes	Nurse	CHC	Yes	3	8	Yes	No	Yes	No	2	Yes	No	MCHAide	CHP	3	Born alive	Normal	Yes	1hrs	MCHAide	Yes	2hrs	Nurse	Patient Home
503	Bomaru	8	Guma	Upper Bambara	5	22	21	Yes	Primary	Islam	Mende	2	2	2	Married	Farmer	<30	None	Farmer	Urban	Modern	Pit/others	Yes	Nurse	CHP	Yes	4	9	Yes	Yes	Yes	No	2	Yes	No	MCHAide	CHP	12hrs	Born alive	Normal	Yes	1hrs	MCHAide	Yes	3hrs	MChAide	Patient Home
504	Bomaru	8	Guma	Upper Bambara	7	25	24	Yes	Primary	Islam	Mende	3	3	2	Married	Farmer	<30	None	Farmer	Urban	Modern	Pit/others	Yes	Nurse	CHP	Yes	3	8	Yes	Yes	Yes	No	2	Yes	No	MCHAide	CHP	3	Born alive	Normal	Yes	1hrs	Nurse	Yes	1hrs	Nurse	Patient Home
505	Bomaru	8	Guma	Upper Bambara	4	28	27	Yes	Primary	Islam	Gbandi	4	5	2	Married	Farmer	<30	Junior Secondary	Carpenter	Urban	Modern	Pit/others	Yes	Nurse	CHP	Yes	5	6	Yes	Yes	Yes	No	3	Yes	No	MCHAide	CHP	3	Born alive	Normal	Yes	1hrs	Nurse	Yes	1hrs	Nurse	Patient Home
506	Daru	18	Sowa	Jawei	Always	23	22	Yes	Senior Secondary	Islam	Mende	2	2	1	Living together	Student	<30	Senior Secondary	Student	Urban	Modern	Flush	Yes	Nurse	CHC	Yes	6	3	Yes	Yes	Yes	Yes	2	Yes	No	MCHAide	CHC	2	Born alive	Normal	Yes	1hrs	MCHAide	Yes	2hrs	MCHAide	CHC
507	Daru	18	Sowa	Jawei	Always	28	27	No	None	Christian	Mende	4	4	1	Widow	Trader	<30	No	No	Urban	Modern	Pit/others	Yes	TBA	CHC	No	4	8	Yes	Yes	Yes	No	2	Yes	No	MCHAide	CHC	3	Born alive	Normal	Yes	3hrs	MCHAide	Yes	2	TBA	Other home
508	Daru	18	Sowa	Jawei	Always	31	30	Yes	Higher	Islam	Mandingo	1	1	1	Married	Teacher	<30	Higher	CHO	Urban	Modern	Flush	Yes	Midwife	CHC	Yes	3	8	Yes	No	Yes	No	2	Yes	No	MCHAide	CHC	1	Born alive	Normal	Yes	1hrs	Nurse	Yes	3	MCHAide
509	Daru	18	Sowa	Jawei	6	22	21	Yes	Junior Secondary	Islam	Mende	1	1	1	Living together	Student	<30	Vocational	Mine worker	Urban	Modern	Pit/others	Yes	Nurse	CHC	Yes	6	7	Yes	Yes	Yes	Yes	3	Yes	Yes	Midwife	Private	2	Born alive	Normal	Yes	1hrs	Nurse	Yes	3	Nurse	Hospital
510	Daru	18	Sowa	Jawei	4	23	22	Yes	Senior Secondary	Islam	Mende	1	1	1	Single	Student	<30	No	No	Urban	Modern	Pit/others	Yes	Nurse	CHC	Yes	6	8	Yes	No	Yes	No	2	Yes	Yes	Doctor	Hospital	5	Born alive	CS	Yes	3hrs	Doctor	Yes	4	MCHAide	Patient Home
511	Daru	18	Sowa	Jawei	3	23	22	Yes	Junior Secondary	Christian	Mende	2	2	2	Married	Trader	<30	Senior Secondary	Trader	Urban	Modern	Pit/others	Yes	Nurse	CHC	Yes	6	Don’t know	Yes	Yes	Yes	Yes	3	Yes	No	MCHAide	CHC	1	Born alive	Normal	Yes	1hrs	Nurse	N0	0	0	0
512	Daru	18	Sowa	Jawei	3	23	22	Yes	Senior Secondary	Christian	Sherbro	1	1	1	Married	Trader	<30	Senior Secondary	Trader	Urban	Modern	Pit/others	Yes	Nurse	CHC	Yes	3	8	Yes	No	Yes	No	Don’t Know	Don’t know	No	MCHAide	CHC	2	Born alive	Normal	Yes	1	Nurse	Yes	3	Nurse	Patient Home
513	Daru	18	Sowa	Jawei	3	19	18	No	None	Islam	Mende	1	2	1	Married	Trader	<30	Junior Secondary	Trader	Urban	Modern	Pit/others	Yes	Nurse	CHC	Yes	1	8	Yes	Yes	Yes	No	2	Yes	No	MCHAide	CHC	3	Born alive	Normal	Yes	3	MCHAide	Yes	3	MCHAide	Patient Home
514	Daru	18	Sowa	Jawei	Always	25	24	Yes	Junior Secondary	Christian	Kissi	3	4	1	Married	Trader	<30	Senior Secondary	Police office	Urban	Modern	Flush	Yes	Midwife	CHC	Yes	4	6	Yes	No	Yes	Yes	Don’t Know	Yes	No	MCHAide	CHC	2	Born alive	Normal	Yes	5hrs	Nurse	Yes	5hrs	Nurse	Patient Home
515	Daru	18	Sowa	Jawei	Always	22	21	Yes	Senior Secondary	Christian	Mende	2	2	1	Living together	Student	<30	Vocational	Nurse	Urban	Modern	Pit/others	Yes	Nurse	CHC	Yes	6	7	Yes	Yes	Yes	Yes	2	Yes	Yes	Doctor	Hospital	7	Born alive	CS	Yes	1hrs	Midwife	Yes	7	MCHAide	Patient Home
516	Tenehun	3	Lower Luyengeh	Jawie	Always	19	18	No	None	Islam	Mende	2	2	2	Married	Farmer	>60	None	Farmer	Rural	Natural	Pit/others	Yes	MCHAide	CHP	Yes	Don’t know	5	Yes	Yes	Yes	Yes	2	Yes	No	MCHAide	CHP	4	Born alive	Normal	Yes	2hrs	MCHAide	N0	0	0	0
517	Tenehun	3	Lower Luyengeh	Jawei	Always	35	34	No	None	Islam	Mende	7	7	3	Married	Farmer	>60	Primary	Farmer	Rural	Natural	Pit/others	Yes	MCHAide	CHP	Yes	3	7	Yes	Yes	Yes	Yes	3	Yes	No	MCHAide	CHP	4	Born alive	Normal	Yes	3hrs	MCHAide	N0	0	0	0
518	Tenehun	3	Lower Luyengeh	Jawei	Always	32	32	No	None	Islam	Mende	7	7	2	Married	Farmer	30-60	None	Farmer	Rural	Natural	Pit/others	Yes	MCHAide	CHP	Yes	3	6	Yes	No	Yes	No	Don’t Know	Yes	No	MCHAide	CHP	3	Born alive	Normal	Yes	2hrs	MCHAide	Yes	3	MCHAide	Other home
519	Tenehun	3	Lower Luyengeh	Jawei	Always	30	30	Yes	Primary	Islam	Mende	5	5	2	Married	Farmer	>60	None	Farmer	Rural	Modern	Pit/others	Yes	MCHAide	CHP	Yes	4	8	Yes	Yes	Yes	Yes	3	Yes	No	MCHAide	CHP	4	Born alive	Normal	Yes	3hrs	MCHAide	N0	0	0	0
520	Tenehun	3	Lower Luyengeh	Jawei	1	21	21	Yes	Primary	Islam	Mende	2	1	1	Married	Trader	>60	Primary	Trader	Rural	Natural	Pit/others	Yes	Nurse	CHP	Yes	6	4	No	No	Yes	No	2	Yes	Yes	Doctor	Hospital	14	Born alive	CS	Yes	1hrs	Doctor	N0	0	0	0
521	Tenehun	3	Lower Luyengeh	Jawei	Always	30	29	No	None	Islam	Mende	4	4	2	Married	Farmer	>60	Senior Secondary	Farmer	Rural	Natural	Pit/others	Yes	TBA	CHP	No	6	5	Yes	No	Yes	Yes	2	Yes	Yes	Midwife	Hospital	1	Born alive	Normal	Yes	2hrs	Midwife	Yes	9	MCHAide	Patient Home
522	Tenehun	3	Lower Luyengeh	Jawei	Always	30	30	Yes	Primary	Islam	Mende	6	6	2	Married	Farmer	>60	None	Farmer	Rural	Natural	Pit/others	Yes	Nurse	CHP	Yes	4	7	Yes	No	Yes	Yes	2	Yes	No	MCHAide	CHP	1	Born alive	Normal	Yes	2hrs	MCHAide	N0	0	0	0
523	Tenehun	3	Lower Luyengeh	Jawei	Always	34	34	No	None	Islam	Mende	8	8	2	Married	Farmer	>60	Primary	Farmer	Rural	Modern	Pit/others	Yes	MCHAide	CHP	Yes	5	8	No	No	Yes	No	2	Yes	No	MCHAide	CHP	3	Born alive	Normal	Yes	3hrs	MCHAide	N0	0	0	0
524	Tenehun	3	Lower Luyengeh	Jawei	Always	20	20	Yes	Junior Secondary	Islam	Mende	3	3	2	Married	Farmer	>60	Vocational	Trader	Rural	Modern	Pit/others	Yes	MCHAide	CHP	Yes	4	5	Yes	No	Yes	No	3	Yes	No	MCHAide	CHP	9	Born alive	Normal	Yes	2hrs	MCHAide	N0	0	0	0
525	Tenehun	3	Lower Luyengeh	Jawei	3	18	18	Yes	Primary	Islam	Mende	2	2	2	Married	Farmer	>60	Junior Secondary	Farmer	Rural	Natural	Pit/others	Yes	MCHAide	CHP	Yes	3	5	Yes	Yes	Yes	Yes	3	Yes	No	MCHAide	CHP	5	Born alive	Normal	Yes	3hrs	MCHAide	N0	0	0	0
526	Limeyana	33	Sowa	Jawei	Always	20	20	Yes	Junior Secondary	Islam	Mende	2	2	1	Married	Farmer	>60	Junior Secondary	Bike rider	Rural	Natural	Pit/others	Yes	Nurse	CHC	Yes	5	4	Yes	No	Yes	Yes	2	Yes	Yes	Midwife	CHC	1	Born alive	Normal	No	0	0	0	0	0	0
527	Limeyana	33	Sowa	Jawei	Always	39	39	Yes	Junior Secondary	Islam	Mende	4	4	1	Married	Farmer	>60	Primary	Farmer	Rural	Natural	Pit/others	Yes	MCHAide	MCHP	Yes	4	4	Yes	Yes	Yes	Yes	4	Yes	No	MCHAide	MCHP	2	Born alive	Normal	Yes	2hrs	MCHAide	Yes	14	MCHAide	MCHP
528	Limeyana	33	Sowa	Jawei	Always	33	33	Yes	Junior Secondary	Islam	Mende	4	5	2	Married	Farmer	>60	Primary	Farmer	Rural	Natural	Pit/others	Yes	MCHAide	MCHP	Yes	5	3	Yes	Yes	Yes	Yes	3	Yes	No	MCHAide	MCHP	1	Born alive	Normal	Yes	1	MCHAide	Yes	7	MCHAide	Patient Home
529	Limeyana	33	Sowa	Jawei	Always	20	20	Yes	Junior Secondary	Islam	Mende	2	2	2	Married	Trader	30-60	Junior Secondary	Bike rider	Rural	Natural	Pit/others	Yes	MCHAide	MCHP	Yes	4	4	Yes	Yes	Yes	Yes	3	Yes	No	MCHAide	MCHP	2	Born alive	Normal	Yes	1	MCHAide	Yes	1	MCHAide	Patient Home
530	Bombohun	33	Sowa	Jawei	Always	18	18	Yes	Junior Secondary	Christian	Mende	1	1	1	Married	Farmer	>60	Primary	Farmer	Rural	Natural	Pit/others	Yes	Nurse	MCHP	Yes	4	3	Yes	Yes	Yes	No	3	Yes	No	MCHAide	Hospital	2	Born alive	Normal	Yes	1	Nurse	N0	0	0	0
531	Bombohun	33	Sowa	Jawei	Always	24	24	Yes	Junior Secondary	Islam	Mende	3	4	2	Married	Trader	<30	Junior Secondary	Carpenter	Rural	Natural	Pit/others	Yes	Nurse	MCHP	Yes	1	5	Yes	No	Yes	No	3	Yes	No	MCHAide	MCHP	2	Born alive	Normal	Yes	1	MCHAide	Yes	2	MCHAide	Patient Home
532	Bombohun	33	Sowa	Jawei	5	20	20	Yes	Junior Secondary	Islam	Mende	1	1	1	Married	Student	<30	Higher	Student	Rural	Natural	Pit/others	No	MCHAide	MCHP	Yes	3	4	Yes	Yes	Yes	Yes	4	Yes	No	MCHAide	MCHP	1	Born alive	Normal	Yes	5hrs	MCHAide	Yes	14	MCHAide	MCHP
533	Bombohun	33	Sowa	Jawei	Always	40	40	Yes	Primary	Islam	Mende	6	6	2	Married	Farmer	<30	Primary	Farmer	Rural	Natural	Pit/others	Yes	MCHAide	MCHP	Yes	5	4	Yes	Yes	Yes	Yes	4	Yes	No	MCHAide	MCHP	2	Born alive	Normal	Yes	1	MCHAide	Yes	7	MCHAide	MCHP
534	Bombohun	33	Sowa	Jawei	Always	20	20	Yes	Senior Secondary	Christian	Mende	2	2	2	Married	Student	<30	Senior Secondary	Student	Rural	Natural	Pit/others	Yes	Nurse	MCHP	Yes	5	5	Yes	No	Yes	Yes	3	Yes	No	MCHAide	MCHP	3	Born alive	Normal	Yes	2hrs	MCHAide	Yes	3hrs	MCHAide	Patient Home
535	Bombohun	33	Sowa	Jawei	3	28	28	Yes	Primary	Islam	Mende	2	3	2	Married	Farmer	30-60	Primary	Farmer	Rural	Natural	Pit/others	Yes	MCHAide	MCHP	Yes	4	3	Yes	Yes	Yes	Yes	3	Yes	No	MCHAide	MCHP	1	Born alive	Normal	Yes	1	MCHAide	Yes	7hrs	MCHAide	MCHP
536	Bombohun	33	Sowa	Jawei	Always	21	21	No	None	Islam	Mende	2	3	2	Married	Farmer	<30	None	Farmer	Rural	Natural	Pit/others	No	MCHAide	MCHP	Yes	3	7	Yes	Yes	Yes	No	4	Yes	No	MCHAide	MCHP	3	Born alive	Normal	Yes	3	MCHAide	Yes	4	MCHAide	Patient Home
537	Limeyana	33	Sowa	Jawei	3	24	24	Yes	Junior Secondary	Christian	Mende	1	1	1	Married	Tailor	>60	Higher	Student	Rural	Natural	Pit/others	Yes	Nurse	Hospital	Yes	4	5	Yes	Yes	Yes	Yes	3	Yes	Yes	Midwife	Hospital	7	Born alive	Normal	Yes	2	Midwife	N0	0	0	0
538	Gandohun	4	Kaio	Jawei	Always	28	28	Yes	Junior Secondary	Islam	Mende	2	2	2	Married	Farmer	>60	None	Farmer	Rural	Natural	Pit/others	Yes	MCHAide	MCHP	Yes	4	6	Yes	Yes	Yes	Yes	4	Yes	No	MCHAide	MCHP	3	Born alive	Normal	Yes	4hrs	MCHAide	N0	0	0	0
539	Gandohun	4	Kaio	Jawei	Always	28	28	Yes	Junior Secondary	Islam	Mende	2	4	2	Married	Trader	>60	Junior Secondary	Maison	Rural	Natural	Pit/others	Yes	MCHAide	MCHP	Yes	6	3	Yes	Yes	Yes	Yes	3	Yes	No	MCHAide	MCHP	3	Born alive	Normal	Yes	4hrs	MCHAide	Yes	2	TBA	Other home
540	Gandohun	4	Kaio	Jawei	Always	35	35	Yes	Primary	Islam	Mende	3	3	2	Married	Farmer	30-60	Primary	Farmer	Rural	Natural	Pit/others	Yes	MCHAide	MCHP	Yes	4	4	Yes	Yes	Yes	Yes	3	Yes	No	MCHAide	MCHP	2	Born alive	Normal	Yes	1	MCHAide	Yes	7	MCHAide	Patient Home
541	Gandohun	4	Kaio	Jawei	1	17	17	Yes	Primary	Islam	Mende	1	1	1	Married	Student	>60	Higher	Student	Rural	Natural	Flush	Yes	MCHAide	MCHP	Yes	3	4	Yes	Yes	Yes	Yes	3	Yes	No	MCHAide	MCHP	1	Born alive	Normal	Yes	1hrs	MCHAide	N0	0	0	0
542	Gandohun	4	Kaio	Jawei	Always	22	22	Yes	Primary	Islam	Mende	2	3	2	Married	Farmer	>60	Junior Secondary	Farmer	Rural	Natural	Pit/others	Yes	MCHAide	MCHP	Yes	4	4	Yes	Yes	Yes	Yes	4	Yes	No	MCHAide	MCHP	2	Born alive	Normal	Yes	1hrs	MCHAide	N0	0	0	0
543	Gandohun	4	Kaio	Jawei	1	19	19	Yes	Primary	Islam	Mende	2	2	2	Married	Farmer	>60	Primary	Farmer	Rural	Natural	Pit/others	Yes	MCHAide	CHP	Yes	3	2	Yes	Yes	Yes	Yes	3	Yes	No	MCHAide	CHP	2	Born alive	Normal	Yes	2	MCHAide	Yes	1	MCHAide	MCHP
544	Gandohun	4	Kaio	Jawei	Always	20	20	Yes	Primary	Islam	Mende	2	3	2	Married	Farmer	>60	Primary	Farmer	Rural	Natural	Pit/others	Yes	MCHAide	CHP	Yes	4	4	Yes	No	Yes	No	4	Yes	No	MCHAide	CHP	1	Born alive	Normal	Yes	4hrs	MCHAide	N0	0	0	0
545	Gandohun	4	Kaio	Jawei	Always	19	19	Yes	Primary	Islam	Mende	2	2	2	Married	Farmer	>60	Junior Secondary	Farmer	Rural	Natural	Pit/others	Yes	MCHAide	MCHP	Yes	3	3	Yes	No	Yes	Yes	3	Yes	No	MCHAide	CHP	3	Born alive	Normal	Yes	1	MCHAide	N0	0	0	0
546	Tongoyama	46	Luawa Fogiuya	Luawa	1	22	22	Yes	Primary	Christian	Mende	4	4	3	Married	Farmer	<30	None	Farmer	Urban	Natural	Pit/others	Yes	Midwife	Hospital	Yes	5	4	Yes	No	Yes	Yes	2	Yes	Yes	Midwife	Hospital	2	Born alive	Normal	Yes	1hrs	Midwife	N0	0	0	0
547	Tongoyama	46	Luawa Fogiuya	Luawa	19	39	39	Yes	Primary	Islam	Mende	4	8	1	Married	Farmer	<30	Junior Secondary	Tailor	Urban	Natural	Pit/others	Yes	Midwife	Hospital	Yes	5	3	Yes	Yes	Yes	Yes	2	Yes	Yes	Midwife	Hospital	1	Born alive	Normal	Yes	1hrs	Midwife	N0	0	0	0
548	Gitiby	46	Luawa Fogiuya	Luawa	2	20	18	Yes	Senior Secondary	Christian	Mende	1	1	1	Married	Housewife	<30	Senior Secondary	Jobless	Urban	Modern	Pit/others	Yes	Midwife	Hospital	Yes	3	5	Yes	Yes	Yes	Yes	2	Yes	Yes	Midwife	Hospital	1	Born alive	Normal	Yes	2hrs	Midwife	N0	0	0	0
549	Tongoyama	46	Luawa Fogiuya	Luawa	1	18	17	No	None	Christian	Mende	1	1	1	Married	Farmer	<30	Junior Secondary	Farmer	Urban	Modern	Pit/others	Yes	Midwife	Hospital	Yes	4	4	Yes	Yes	Yes	Yes	2	Yes	Yes	Midwife	Hospital	3	Born alive	Assisted	Yes	1hrs	Midwife	N0	0	0	0
550	Gbanyawallu	46	Luawa Fogiuya	Luawa	9	20	20	Yes	Junior Secondary	Islam	Mende	1	2	1	Single	Jobless	<30	No	No	Urban	Modern	Pit/others	Yes	Nurse	CHP	Yes	4	5	Yes	Yes	Yes	Yes	2	Yes	Yes	Midwife	Hospital	2	Born alive	Normal	Yes	1hrs	Midwife	N0	0	0	0
551	Pendembu	17	Naiahun	Upper Bambara	5	30	30	No	None	Islam	Mende	3	3	3	Married	Trader	<30	Junior Secondary	Carpenter	Urban	Modern	Pit/others	Yes	Midwife	CHC	Yes	3	9	Yes	Yes	Yes	Yes	3	Yes	No	MCHAide	CHC	2	Born alive	Normal	Yes	1hrs	MCHAide	Yes	3	MCHAide	Patient Home
552	Pendembu	17	Naiahun	Upper Bambara	1	23	22	Yes	Junior Secondary	Islam	Mende	1	1	1	Married	Housewife	<30	Vocational	Teacher	Urban	Natural	Flush	Yes	Midwife	CHC	Yes	4	5	Yes	Yes	Yes	Yes	2	Yes	Yes	Midwife	Hospital	2	Born alive	Normal	Yes	1hrs	Midwife	Yes	7	Relative	Patient Home
553	Pendembu	17	Naiahun	Upper Bambara	2	22	20	Yes	Primary	Islam	Mende	3	3	2	Married	Farmer	<30	Primary	Farmer	Urban	Modern	Pit/others	Yes	Midwife	CHC	Yes	Don’t know	8	Yes	Yes	Yes	Yes	3	Yes	Yes	Midwife	CHC	3	Born alive	Normal	Yes	1hrs	Midwife	Yes	4	CHW	Patient Home
554	Pendembu	17	Naiahun	Upper Bambara	8	35	33	Yes	Primary	Islam	Mende	4	4	1	Married	Trader	30-60	Primary	Farmer	Urban	Modern	Pit/others	Yes	Nurse	CHC	Yes	4	10	Yes	Yes	Yes	Yes	3	Yes	Yes	Midwife	Private	1	Born alive	Normal	Yes	1hrs	Midwife	Yes	2	Nurse	Patient Home
